# Supplementary material for: Biomimetic Cardiac Tissue Culture Model (CTCM) to Emulate Cardiac Physiology and Pathophysiology ex vivo
Source: Research Square preprint supplement (doi:10.21203/rs.3.rs-1322108/v1), 2022-02-17
Supplement: Supplementary file 1 [file 083c17e48f310eea129f5e54.xlsx]

## Sheet: Sheet1
gene_name	gene_id	D0-1	D0-2	Ctrl-1	Ctrl-2	Ctrl-3	Ctrl-4	TD-1	TD-2	TD-3	TD-4	MC-1	MC-2	MT-1	MT-2
ATP6	ENSSSCG00000018081	8823.65	6346.37	1853.42	2078.31	1504.08	1516.65	2841.16	2008.73	1042.4	1834.67	4476.65	5240.61	11476.6	8136.39
COX3	ENSSSCG00000018082	10724.7	8156.24	3400.07	3604.78	3421.21	3280.06	5008.86	3616.19	2796.84	4415.21	6106.06	8990.9	15225.3	12122.7
COX1	ENSSSCG00000018075	9024.06	7323.35	4391.44	4339.31	4818.1	5092.15	7779.53	4771.92	4822.08	7448.93	9830.67	13084	16616.1	14730.7
COX2	ENSSSCG00000018078	5828.21	4697.37	1370.33	1640.38	908.555	1030.57	2060.86	1345.24	874.033	1657.02	2961.39	3528.54	7492.31	4763.75
ssc-mir-10390	ENSSSCG00000050793	6832.14	6877.83	4749.02	4784.13	4211.03	5339.95	7503.06	4905.09	5472.97	8544.34	10658	13477.9	14948.5	13776.3
ND3	ENSSSCG00000018084	2492.31	1354.14	630.91	832.129	481.715	430.102	1213.05	819.501	261.765	528.845	1418.92	1480.24	3190.62	1987.16
CYTB	ENSSSCG00000018094	1902.72	1436.99	538.767	571.184	345.354	338.984	836.079	567.695	286.271	431.894	1046.96	989.268	2234.64	1751.44
ND4	ENSSSCG00000018087	2114.69	1669.15	799.066	648.971	646.972	661.479	940.751	841.677	648.351	772.433	1595.87	1880.25	3103.14	2355.49
ND6	ENSSSCG00000018092	1878.66	1203	1035.88	575.777	1126.02	993.13	1177.18	1032.9	928.29	869.018	2052.75	2479.31	3894.91	3371.77
RPLP1	ENSSSCG00000004970	4013.71	3617.57	3505.61	5736.41	4178.76	4198.83	9385.45	4327.26	3911.37	8536.44	5609.91	9449.09	7232.46	8809.21
-	ENSSSCG00000033310	2840.55	2138.62	1919.91	3502.61	2591.6	2376.54	9506.47	2460.28	1929.52	5055.16	3931.24	6800.39	3937.93	5679.64
RPLP0	ENSSSCG00000036014	2392.21	2351.72	2475.11	4666.26	2865.42	2932.79	5470.85	3110.3	2858.68	6359.68	3694.63	6249.96	4026.63	5440.02
-	ENSSSCG00000014540	3093.18	2927.78	2916.48	4774.07	3389.67	3532.19	2643.45	2176.76	1905.5	3577.71	2275.99	3402.04	2714.47	3405.19
MYL2	ENSSSCG00000039710	332.092	284.626	6.5689	6.79061	7.78356	4.10983	7.95123	6.63128	2.20629	7.94873	20.2159	30.4099	73.4223	205.392
-	ENSSSCG00000004489	2468.16	2555.51	2103.43	3431.97	2338.46	2566.76	4267.99	2618.34	2534.05	5111.83	3466.71	5172.53	3654.74	4018.92
-	ENSSSCG00000048719	930.349	794.915	149.23	252.687	141.606	126.119	544.353	177.635	108.361	357.502	434.206	496.415	901.54	754.519
RPL10	ENSSSCG00000035997	2255.61	2088.16	1814.3	3222.66	2129.04	2056.93	3973.59	2244.02	1944.65	4029.28	2533.82	4157.3	2957.24	4187.85
RPS18	ENSSSCG00000001502	1984.43	1840.92	1575.32	2503.07	1837.37	1784.14	5437.97	1971.59	1681.1	4041.83	2785.53	4690.93	3442.77	4377.63
FTL	ENSSSCG00000003153	2528.11	2300.67	2591.42	4771.77	3155.58	3102.82	2706.42	1779.41	1596.74	3020.55	1843.3	2894.9	2561.09	3321.82
RPLP2	ENSSSCG00000012842	2134.5	1691.49	1586.87	2678.1	2084.14	1833.02	4492.12	2163.78	1575.01	3154.56	2182.27	3874.26	2306.64	3573.28
TMSB10	ENSSSCG00000008245	2630.36	2258.04	1742.72	2716.77	1917.15	1726.03	5462.56	1592.01	1279.22	3141.4	2424.16	4105.21	2693.03	3881.28
RPS7	ENSSSCG00000031088	1933.02	1871.3	1484.63	2443.6	1577.39	1582.47	4516.38	1943.18	1515.51	3774.07	2337.8	4180.82	2764.75	4103.67
RPS16	ENSSSCG00000020817	1746.4	1490.03	1673.01	2800.91	1950.24	1731.44	4887.18	2161.02	1584.6	3609.97	2525.96	4158.49	2579.66	4123.15
ND4L	ENSSSCG00000018086	1050.09	1063.85	760.262	526.551	525.995	586.047	771.412	608.897	731.167	871.349	1250.11	1739.35	1700.56	1479.33
RPS12	ENSSSCG00000004177	1737.85	1477.93	1348.8	2270.37	1606.21	1477.65	4010.49	1702.71	1392.37	3231.72	2265.77	4252.06	3089.18	3697.38
RPS11	ENSSSCG00000003165	2030.4	1798.77	1337.65	2643.26	1699.75	1624.94	3647	1756.58	1329.08	2897.43	1870.36	3115.13	1861.96	3001.13
TPT1	ENSSSCG00000040929	1454.97	1373.09	1477.37	2530.79	1721.51	1815.7	3362.68	1686.09	1704.16	3193.33	2400.67	3711.02	2736.61	3403.62
RPS8	ENSSSCG00000003930	1615.01	1470.91	1335.95	2129.89	1588.58	1464.81	3961.93	1601.05	1424.95	3131.75	2151.29	3588.06	2396.9	3360.98
ACTG1	ENSSSCG00000028355	2480.19	2445.03	2002.71	2406.89	2237.41	2064.77	1576.25	2088.34	1868.55	2680.85	1686.26	2188.48	1952.42	2309.14
TMSB4X	ENSSSCG00000012119	2355.95	2307.67	1804.12	2660.32	1787.74	1723.09	3346.03	1145.63	1159.13	2339.27	1781.11	3089.12	2379.86	2827.86
-	ENSSSCG00000030849	1387.75	1034.46	1047.13	2100.51	1556.86	1464.56	4978.89	1397.41	1085.22	2564.88	2145.7	3558.94	2242.36	2835.08
ND2	ENSSSCG00000018069	724.218	728.574	483.323	514.696	272.095	304.454	664.144	494.356	332.244	510.433	1078.64	986.009	1554.13	1238.48
RPL23	ENSSSCG00000038880	1453.18	1242.95	1041.81	1582.76	1311.27	1244.29	4108.35	1115.97	1036.44	2410.29	1877.43	3129.31	2090.11	2906.27
-	ENSSSCG00000018063	816.651	587.775	89.3467	145.883	89.9389	68.9843	221.67	108.297	45.0427	182.891	208.122	318.801	506.913	530.312
SPARC	ENSSSCG00000017082	2900.34	2831.97	2537.63	1950.69	2484.69	2180.5	2089.94	2476.12	2681.21	2466.66	2091.27	2140.68	2077.38	2104.46
-	ENSSSCG00000009146	1348.55	1017.28	878.717	1554.32	1097.15	1106.48	4373.59	1105.05	930.773	2271.72	1712.53	3361.67	2240.75	2989.9
ND5	ENSSSCG00000018091	950.121	822.413	786.625	473.997	698.926	689.405	807.866	781.878	772.549	761.315	1493.13	1695.49	1856.57	1769.69
RPL31	ENSSSCG00000008170	1410.04	1169.65	1130.19	1918.37	1380.41	1279.41	3802.86	1332.2	1119.09	2289.53	1696.27	3156.6	1858.11	2715.41
-	ENSSSCG00000018061	527.838	403.096	96.9233	133.995	117.016	99.0597	517.743	128.352	82.7485	251.043	247.536	401.325	552.011	483.896
VIM	ENSSSCG00000011033	1605.28	1641.61	2087.39	2537.44	2349.35	2238.82	2143.3	2517.87	2446.46	3753.69	2366.35	3549.94	2347.4	3258.23
RPS21	ENSSSCG00000021825	1179.31	673.617	843.36	1713.26	1410.19	1211.65	5361.35	1378.29	837.625	1969.08	1636.06	2740.68	1912.05	2309.55
RPS28	ENSSSCG00000013597	1179.14	666.74	867.266	1654.78	1469.33	1233.8	3775.17	1542.61	865.51	1931.05	1650.98	2455.27	1587.93	2124.6
CCL2	ENSSSCG00000017723	1528.36	1542.65	1639.21	1859.08	1456.42	1279.63	2191.07	1244.96	943.793	1734.82	1516.63	1985.88	1669.67	1818
-	ENSSSCG00000029830	1348.12	1259.5	1174.17	1883.48	1296.36	1174.88	2096.79	1446.93	1170.06	2539.11	1310.9	2260.21	1580.02	2465.65
SERPINE1	ENSSSCG00000025698	1722.13	1729.19	1804.57	839.148	2745.9	1980.69	1278.97	2116.16	2625.7	1216.83	1847.83	1465.07	1639.09	1744.26
RACK1	ENSSSCG00000029724	1235.29	1149.64	1102.32	1850.72	1299.62	1281.54	2002.79	1473.29	1316.46	2764.82	1555.51	2545.2	1554.81	2269.54
RPS23	ENSSSCG00000014133	941.977	785.361	901.222	1465.59	1042.5	944.815	3096.14	1196.69	941.425	2362.11	1526.84	3087.32	1638.92	2590.55
RPL27	ENSSSCG00000025507	1106.54	931.376	819.177	1426.71	991.056	954.722	2676.89	1092.39	888.648	1963.6	1392.87	2629.74	2050.8	2407.22
RPL3	ENSSSCG00000040494	1181.5	1138.77	980.446	1442.26	1104.44	1027.78	1798.33	1261.61	1127.08	2248.6	1325.87	2131.84	1458.46	2033.6
-	ENSSSCG00000035904	1161	1220.8	916.888	1440.47	927.386	927.129	1887.94	1022.15	1003.81	2296.36	1172.47	2120.84	1384.55	2072.49
ND1	ENSSSCG00000018065	487.939	443.729	300.263	298.924	161.665	174.987	373.433	297.67	167.221	255.47	546.498	600.228	868.136	610.045
EEF2	ENSSSCG00000025675	1297.32	1343	1087.17	1283.8	1216.27	1221.57	1121.48	1412.18	1402.94	2182.65	1268.4	1697.43	1141.75	1349.71
RPS3	ENSSSCG00000014855	961.919	916.253	827.554	1273.69	886.587	813.214	2145.8	1034.25	874.442	1838.2	1167.57	2015.23	1208.55	1891.04
RPS4X	ENSSSCG00000012405	1055.41	1054.99	847.626	1307.76	941.046	959.567	1707.33	1054.18	989.476	2096.55	1347.64	2211.71	1347.74	1721.41
-	ENSSSCG00000035080	992.256	1065.09	814.224	1198.74	824.072	856.826	1539.05	874.902	1039.44	2094.33	1254.87	2621.46	1354.09	2066.88
-	ENSSSCG00000011272	932.228	883.723	652.103	1118.19	740.549	732.481	2173.61	817.171	754.119	1806.26	1188.26	1946.56	1305.82	1453.83
ENO1	ENSSSCG00000022343	1256.19	1231.29	1354.46	1809.05	1566.79	1495.75	1164.41	1366.4	1252.28	1790.31	1072.04	1442.13	1104.14	1515.53
BGN	ENSSSCG00000012766	1860.17	1661.96	2032.91	1272.19	2033.37	1707.6	1026.27	1767.13	1611.63	1348.71	898.585	830.307	951.78	810.801
TNNC1	ENSSSCG00000011441	97.8859	67.1349	4.33559	3.79934	5.04161	2.83447	9.32627	3.10413	1.44948	3.39652	11.3958	17.0522	67.5697	127.4
TIMP1	ENSSSCG00000012277	849.734	704.38	1709.49	1576.16	1710.1	1695.64	1575.82	1680.96	1958.56	2238.77	1288.43	1827.71	1365.09	1834.79
-	ENSSSCG00000024974	993.394	899.242	823.047	1313.14	918.795	851.707	1700.35	1034.96	776.741	1641.62	978.672	1660.08	1116.6	1637.72
UBB	ENSSSCG00000018033	706.504	605.227	665.964	928.24	755.439	677.853	1266.09	662.871	538.424	1001.91	694.466	1143.88	704.784	1203.82
EEF1B2	ENSSSCG00000016128	780.789	738.501	600.002	1030.57	712.31	714.045	2554.12	889.713	824.404	1946.2	1257.28	2200.08	1315.66	1774.49
RPL24	ENSSSCG00000011952	794.345	678.513	631.942	999.95	748.598	671.81	2287.65	777.872	698.992	1608.13	1080.2	2031.21	1172.77	1674.59
EEF1G	ENSSSCG00000013064	883.325	860.207	697.137	1065.3	822.78	792.371	1344.11	841.551	799.845	1715.7	879.867	1575.97	979.719	1486.73
S100A6	ENSSSCG00000021084	753.986	633.404	819.873	1244.9	1124.25	895.064	2697.62	1101.09	911.839	1955.85	1224.4	2108.45	1106.68	2039.56
COL3A1	ENSSSCG00000016034	1941.49	1700.4	1764.52	852.371	1840.22	1603.11	810.08	998.822	1212.89	636.958	786.323	699.768	913.758	812.409
RPL7	ENSSSCG00000032111	781.528	698.324	533.557	906.876	615.225	622.177	1291.51	635.47	600.147	1315.46	1104.3	1811.57	1277.39	1678.09
-	ENSSSCG00000031838	617.627	416.203	543.346	973.463	748.936	698.936	2653.38	743.394	548.957	1264.58	1009.95	1641.57	1073.19	1491.02
RPS25	ENSSSCG00000036296	687.512	620.118	507.512	879.566	609.039	569.992	2109.56	595.554	563.628	1358.25	994.101	1764.12	1098.73	1539
-	ENSSSCG00000035811	719.809	660.798	431.586	844.324	603.803	582.162	1877.49	619.558	569.286	1326.8	915.001	1521.12	962.166	1299.85
RPS5	ENSSSCG00000004002	740.76	668.362	595.763	991.876	644.577	621.674	1108.88	807.395	637.401	1342.28	729.981	1285.5	928.046	1181.59
RPL5	ENSSSCG00000006899	679.337	659.748	471.354	743.2	533.358	556.5	1424.99	586.715	612.13	1266.01	912.099	1457.49	992.853	1155.22
MGP	ENSSSCG00000037697	1043.09	1024.65	463.392	929.814	296.665	318.231	2167.19	607.917	419.874	1345.36	930.723	1446.04	1155.03	1076.46
-	ENSSSCG00000037274	703.048	768.623	567.995	713.446	590.606	591.604	840.472	521.608	539.094	787.32	689.504	869.085	728.186	883.469
-	ENSSSCG00000000576	474.7	459.256	259.914	367.988	278.324	269.435	567.184	308.693	295.407	572.338	434.192	673.295	509.686	680.654
RPL17-C18orf32	ENSSSCG00000035007	542.76	499.28	425.358	766.776	531.834	530.096	1796.71	525.757	510.859	1152.94	884.052	1458.92	885.905	1236.93
RPS2	ENSSSCG00000033697	616.293	588.166	482.075	769.056	552.614	479.99	946.378	621.038	500.885	1190.03	579.436	1141.88	678.287	1020.44
RPSA	ENSSSCG00000037236	590.887	582.129	472.232	803.418	509.662	485.41	958.388	593.846	504.46	1226.04	698.44	1247.58	729.764	981.786
COL1A2	ENSSSCG00000015326	1126.78	989.973	1262.8	515.98	1502.56	1224.85	478.21	923.175	1265.23	563.24	660.014	584.284	687.049	687.995
-	ENSSSCG00000014569	510.524	469.09	451.636	716.173	503.839	495.7	1122.97	538.08	484.841	1014.84	679.667	1146.2	679.683	1042.84
RPL36A-HNRNPH2	ENSSSCG00000039046	432.833	357.842	366.778	535.567	469.787	444.997	1284.69	461.776	449.022	1065.43	801.718	1395.54	953.656	1066.33
LGALS1	ENSSSCG00000033854	660.591	634.987	453.379	743.385	549.643	478.771	1124.02	407.946	322.097	778.245	451.134	861.674	508.863	1049.31
RPS15	ENSSSCG00000033169	506.915	412.881	422.204	663.252	484.604	428.202	1085.93	521.936	367.395	824.929	514.969	923.559	622.814	1040.98
-	ENSSSCG00000010190	24.6825	17.0693	1.21021	1.52814	0.857446	0.679241	1.66944	1.04736	0.353443	1.05962	2.72147	7.70917	14.8342	26.7666
SPON2	ENSSSCG00000039488	373.995	404.775	599.5	638.708	608.734	542.877	976.516	1171.86	834.851	1042.27	610.21	756.101	661.503	737.669
RPL6	ENSSSCG00000039130	470.195	437.774	390.967	642.829	437.12	446.403	950.729	458.461	445.216	955.33	684.636	1091.86	721.772	798.513
NDUFA4	ENSSSCG00000024313	180.72	152.88	129.172	177.014	145.472	133.167	275.485	141.234	119.342	228.212	179.925	327.359	282.067	448.907
SLC25A6	ENSSSCG00000033673	600.744	624.428	445.815	652.176	412.4	390.961	604.879	476.25	383.965	867.917	452.02	771.61	502.004	777.84
-	ENSSSCG00000047299	450.461	381.322	487.676	453.996	502.504	401.414	23.1088	460.318	397.076	677.389	700.796	927.456	1384.43	1697.77
-	ENSSSCG00000034448	508.968	470.851	377.107	549.848	404.86	378.505	1085.21	405.258	345.377	780.587	459.732	853.336	532.817	834.849
IGFBP2	ENSSSCG00000035392	421.058	377.561	1924.15	1817.72	1912.52	1674.56	466.976	536.685	530.404	413.201	462.405	630.492	735.746	1252.43
YBX1	ENSSSCG00000028485	464.072	481.992	379.627	544.744	395.535	378.577	447.676	403.334	359.08	701.662	470.762	688.97	486.805	592.646
SSR4	ENSSSCG00000012784	394.696	363.644	472.746	768.257	558.935	510.659	1320.98	587.134	478.996	1111.59	635.837	1194.22	685.718	951.053
DCN	ENSSSCG00000000915	347.727	321.71	584.785	684.583	709.899	668.257	1068.66	589.947	567.906	851.09	857.053	921.26	831.7	958.672
RPS3A	ENSSSCG00000009019	437.508	409.56	310.973	527.655	361.235	367.514	1209.91	363.094	361.538	843.119	614.641	1015.71	727.091	798.937
RPL15	ENSSSCG00000037030	491.969	472.522	387.286	652.878	448.484	443.93	929.552	481.855	430.232	830.344	596.324	911.087	686.256	853.856
ID3	ENSSSCG00000039514	693.435	748.846	540.943	714.607	454.49	403.689	716.401	508.946	317.666	660.946	502.441	656.644	642.084	801.417
COL1A1	ENSSSCG00000036135	1381.56	1147.59	1037.93	278.73	1100.03	809.609	204.943	807.685	1049.66	353.587	290.974	220.856	257.831	192.208
SSR2	ENSSSCG00000006501	490.169	478.938	463.684	657.44	535.763	512.773	764.668	546.022	512.869	919.531	565.638	840.217	629.434	843.259
-	ENSSSCG00000018089	170.699	130.617	76.1146	25.4927	40.6719	37.3732	64.9102	58.7301	41.6203	12.1909	100.358	116.983	1720.33	339.134
TAGLN	ENSSSCG00000015073	520.04	568.053	530.181	759.161	584.494	512.356	766.118	558.552	462.199	882.45	538.678	849.59	674.314	783.489
P4HB	ENSSSCG00000039148	772.248	722.858	657.392	476.917	727.761	613.554	442.437	631.797	606.696	622.755	450.279	550.407	466.497	588.999
-	ENSSSCG00000033262	461.961	394.454	368.931	583.873	397.149	366.503	889.525	465.913	335.25	714.02	426.201	760.201	490.228	745.59
-	ENSSSCG00000006081	374.848	327.654	297.298	511.95	354.523	338.587	1257.07	379.564	293.605	657.411	521.278	941.568	644.705	857.026
TNNT2	ENSSSCG00000023031	23.2838	16.4505	1.74683	1.13454	0.841487	0.606664	0.847674	0.836398	0.176408	0.53738	4.76413	3.73781	24.5304	36.5105
-	ENSSSCG00000013366	380.864	376.269	513.231	740.946	650.993	667.61	746.471	483.321	551.533	871.408	690.679	986.597	765.527	854.062
CD63	ENSSSCG00000000361	481.475	439.905	406.886	596.061	473.634	451.042	784.04	447.692	410.501	714.227	485.536	756.686	602.905	770.082
-	ENSSSCG00000018088	170.689	91.0783	72.2268	13.6238	51.2819	31.9568	49.5026	39.1704	58.1277	15.2887	92.3518	139.784	1270.02	421.685
EIF1	ENSSSCG00000017430	520.273	480.198	361.054	462.031	374.533	388.23	418.861	336.038	327.255	439.525	373.563	423.971	398.684	444.879
H3-3A	ENSSSCG00000023971	447.483	454.905	350.153	526.924	361.723	393.403	554.58	341.788	351.615	602.333	496.847	728.326	646.881	654.084
RPL38	ENSSSCG00000017239	303.008	210.948	254.87	383.469	389.035	333.781	1240.46	380.492	253.567	574.127	550.291	859.714	559.366	767.9
SERPINH1	ENSSSCG00000039468	967.28	923.681	644.25	413.932	599.764	487.284	359.35	499.944	495.674	357.326	318.97	343.364	338.042	371.317
RPS17	ENSSSCG00000027358	337.273	278.734	293.328	460.147	360.203	317.248	844.482	380.776	307.707	687.188	537.47	802.25	589.17	791.759
MYL3	ENSSSCG00000011325	67.3529	47.5536	1.86177	0.761227	1.10302	0.931855	2.29309	1.53533	0.328288	1.17221	3.51102	6.15149	14.5414	46.0798
RPS6	ENSSSCG00000005169	354	345.96	275.608	434.592	300.462	307.86	756.881	343.053	324.208	739.268	499.684	826.919	554.385	681.251
-	ENSSSCG00000000405	273.234	273.211	232.9	300.171	251.983	234.691	325.541	246.417	249.74	398.63	267.875	391.574	265.381	306.629
FN1	ENSSSCG00000016174	506.411	463.395	1265.59	401.415	1564.06	1349.36	310.102	893.127	1495.78	580.393	577.923	507.288	507.639	543.794
TPM4	ENSSSCG00000013849	515.922	558.058	480.822	631.734	509.103	507.123	597.917	405.576	418.025	544.674	560.741	649.907	665.816	676.412
SLC25A3	ENSSSCG00000000886	365.265	366.017	245.725	340.895	272.161	269.28	341.178	275.557	248.38	473.969	330.159	483.278	327.902	377.089
-	ENSSSCG00000016737	412.976	402.25	315.62	429.803	352.978	333.503	528.582	341.573	318.055	600.6	379.943	629.424	383.24	550.907
-	ENSSSCG00000043761	394.49	314.281	338.052	291.725	318.328	233.523	47.131	365.927	319.644	526.382	564.038	734.11	1012.1	1167.54
RPS13	ENSSSCG00000013381	369.122	370.03	280.177	455.09	308.87	288.699	636.709	333.752	316.855	746.505	381.911	769.195	423.526	610.779
COL6A2	ENSSSCG00000028022	756.374	676.17	1050.6	425.503	1026.77	834.797	288.409	609.018	652.012	369.719	280.679	281.827	292.062	326.93
OAZ1	ENSSSCG00000013460	371.108	374.029	307.393	456.322	296.612	298.76	411.239	306.039	252.669	453.451	340.683	517.747	416.385	505.326
HTRA1	ENSSSCG00000010703	627.689	659.869	596.682	582.207	563.464	506.584	498.486	530.943	513.606	505.807	439.456	493.881	463.983	559.275
ATP5PO	ENSSSCG00000012042	227.062	214.784	154.152	252.897	174.179	182.931	397.155	178.332	169.368	378.716	269.2	483.825	368.31	453.699
RPL28	ENSSSCG00000039460	360.043	290.21	325.292	555.2	405.069	379.741	643.887	421.814	296.318	629.253	391.523	664.331	447.643	643.433
BTF3	ENSSSCG00000014071	347.744	321.589	257.71	389.943	301.869	304.646	572.35	307.641	315.586	574.681	451.263	656.485	414.25	612.694
RPL35	ENSSSCG00000034227	308.783	253.625	245.027	433.12	285.677	258.204	1041.76	319.132	233.68	575.086	394.251	687.09	411.216	627.759
DDIT4	ENSSSCG00000031888	493.872	500.076	68.5276	90.8799	767.058	754.422	121.719	138.045	607.38	511.853	112.946	493.369	97.0977	678.326
-	ENSSSCG00000044700	631.55	512.495	872.796	232.788	973.808	658.336	252.966	659.842	696.432	195.114	322.482	216.127	306.048	268.635
-	ENSSSCG00000009303	316.962	280.65	226.016	367.436	276.655	270.057	579.138	263.59	241.402	541.786	381.037	707.739	425.633	598.15
RPS9	ENSSSCG00000029785	348.175	350.494	240.573	363.716	256.216	232.015	492.662	277.432	251.978	543.195	296.707	532.207	385.968	535.81
RPS15A	ENSSSCG00000035768	295.556	235.234	188.296	329.611	246.053	235.693	1021.16	252.901	213.443	540.786	422.988	706.501	528.761	652.986
RPS29	ENSSSCG00000038507	197.826	111.349	205.686	360.674	361.019	290.609	992.319	370.322	202.104	518.069	488.547	718.239	369.985	662.929
ACTB	ENSSSCG00000007585	514.766	543.47	391.307	459.476	365.408	332.056	293.151	403.324	336.026	403.317	308.714	296.19	324.177	274.867
SERF2	ENSSSCG00000024263	385.912	288.25	219.892	427.959	341.987	306.144	599.558	280.134	191.198	383.711	276.094	423.357	330.56	384.696
-	ENSSSCG00000017509	318.33	257.341	219.632	390.828	304.509	290.869	618.809	278.673	222.618	479.009	367.575	530.345	438.714	498.811
-	ENSSSCG00000004945	323.941	319.891	235.499	355.362	251.511	253.954	472.299	279.463	266.984	553.264	390.236	582.873	410.268	466.978
YBX3	ENSSSCG00000000633	282.09	273.82	241.215	331.542	261.441	256.389	240.638	278.005	247.257	349.307	249.302	336.685	262.374	306.46
COL6A1	ENSSSCG00000022506	616.739	524.307	928.731	325.261	890.565	704.674	221.739	577.494	581.722	296.858	239.293	227.625	235.995	195.791
CST3	ENSSSCG00000037360	312.5	312.234	393.097	478.502	387.536	377.076	385.344	377.14	377.358	580.724	335.081	441.978	367.119	465.306
ATP5MD	ENSSSCG00000032165	242.062	153.481	115.974	177.657	157.52	135.668	447.265	133.793	91.0979	198.686	159.224	295.442	335.418	373.107
NME2	ENSSSCG00000017591	304.48	270.88	211.313	344.376	252.165	228.286	471.372	261.164	207.18	428.823	299.378	489.3	315.76	509.424
H3-5	ENSSSCG00000017202	299.691	308.85	345.156	464.175	291.151	301.288	462.84	324.175	257.713	357.175	402.101	426.518	451.288	381.776
CEBPD	ENSSSCG00000032367	188.416	222.202	462.144	650.815	333.635	314.242	681.737	587.297	355.793	493.357	510.313	503.521	584.23	492.111
CSTB	ENSSSCG00000027357	273.776	227.841	360.637	616.358	464.802	475.822	480.317	408.536	369.828	593.64	414.689	632.133	400.378	574.085
TPI1	ENSSSCG00000000685	369.288	355.72	337.204	456.63	387.37	343.009	359.063	326.445	293.515	478.101	277.566	416.273	323.67	444.159
DES	ENSSSCG00000020785	178.704	158.325	3.86292	2.49559	1.93675	2.61106	4.1587	5.92982	2.37521	3.56777	4.68253	3.73962	3.09153	4.34221
COX8A	ENSSSCG00000013046	321.352	308.59	264.378	403.155	289.985	269.828	387.521	285.628	227.64	493.476	290.852	470.343	348.022	385.144
ITM2B	ENSSSCG00000009403	247.425	257.786	296.67	386.92	354.036	360.019	658.394	412.35	419.674	604.899	507.358	657.053	466.974	572.497
-	ENSSSCG00000013889	310.268	273.251	238.734	383.675	260.974	241.299	409.233	320.017	230.207	462.221	264.172	449.126	329.758	402.722
RPS27A	ENSSSCG00000034617	251.824	212.769	169.586	293.696	216.327	211.962	813.19	195.088	183.322	426.729	302.714	579.894	347.907	539.303
MMP2	ENSSSCG00000002829	385.597	341.762	668.34	382.462	697.908	606.909	351.508	600.548	610.027	374.709	342.967	270.098	346.512	315.202
RPL18	ENSSSCG00000025928	306.84	259.73	223.214	399.137	263.293	245.923	503.232	310.946	226.798	485.822	290.681	487.964	367.934	470.431
MT1X	ENSSSCG00000030300	19.2012	10.2558	15.8063	19.0301	22.6506	14.8756	56.0655	61.5544	41.7585	70.8542	61.7788	55.0345	54.1299	55.4108
-	ENSSSCG00000040273	239.993	194.553	180.374	321.601	234.531	212.534	933.446	227.718	187.995	451.579	341.526	610.238	332.659	477.665
ANKRD1	ENSSSCG00000010461	435.57	340.949	17.4012	11.4332	18.1103	28.5612	22.1879	23.0827	11.9475	15.7121	31.6924	19.8178	28.8212	20.162
PDIA3	ENSSSCG00000004700	408.918	409.708	317.223	263.422	329.823	305.46	375.45	301.646	315.187	304.628	353.969	330.919	379.021	379.409
SPP1	ENSSSCG00000009216	190.106	173.715	387.646	549.854	317.332	399.605	535.316	407.578	370.051	460.926	482.155	464.16	433.957	436.768
PRDX1	ENSSSCG00000003914	213.093	208.696	175.995	285.102	208.536	194.975	374.065	171.596	157.266	328.914	228.6	387.954	293.601	360.874
CAVIN3	ENSSSCG00000014633	450.508	442.678	337.743	417.808	310.493	257.411	322.401	282.432	195.725	319.919	191.983	322.026	218.502	355.128
SOD3	ENSSSCG00000028814	419.23	367.883	606.706	352.999	547.074	456.657	342.59	474.606	274.868	333.163	166.903	159.349	196.161	146.677
CFL1	ENSSSCG00000012974	338.841	353.917	284.734	352.623	282.922	247.084	290.342	275.322	236.267	374.261	236.778	326.327	222.787	230.917
TPM2	ENSSSCG00000005316	101.187	89.3797	203.696	229.018	241.784	226.539	395.711	249.137	236.516	483.884	242.754	446.389	228.077	329.601
EIF3G	ENSSSCG00000013661	238.307	222.364	223.91	369.144	241.664	236.269	443.037	274.934	248.277	481.002	251.359	432.933	297.551	433.39
THBS1	ENSSSCG00000004789	355.519	307.813	688.329	243.872	869.533	677.276	249.876	492.873	540.503	145.856	418.038	259.741	455.464	382.627
RPS20	ENSSSCG00000040470	221.321	190.637	212.12	366.21	257.964	233.151	620.698	268.787	204.368	470.428	324.205	554.3	321.972	475.04
-	ENSSSCG00000038359	266.225	265.667	215.256	241.798	213.75	182.759	273.23	261.293	203.094	273.124	225.685	239.479	189.95	221.45
ECM1	ENSSSCG00000029230	220.615	189.28	668.867	438.841	848.855	797.313	349.792	618.906	651.225	424.882	367.244	326.849	373.308	339.299
RPS19	ENSSSCG00000003042	222.065	185.709	202.546	397.896	282.023	255.915	679.944	275.975	217.346	459.642	313.059	566.741	411.363	502.45
HSP90AA1	ENSSSCG00000002535	261.099	263.992	205.228	242.735	204.367	210.321	249.705	238.464	247.18	274.305	282.233	284.822	269.164	266.944
PABPC1	ENSSSCG00000006063	324.182	342.833	304.822	303.746	332.712	333.913	291.26	391.943	403.807	388.15	364.635	319.765	341.022	313.611
-	ENSSSCG00000007743	223.563	226.877	177.897	254.497	185.268	185.797	357.071	194.174	169.127	335.709	234.779	366.644	263.458	369.922
RPL11	ENSSSCG00000024260	211.623	196.137	165.368	284.657	200.251	201.647	467.954	204.432	198.593	425.945	301.37	524.066	345.837	474.79
EIF4A1	ENSSSCG00000017957	212.981	208.446	210.014	253.377	209.027	205.484	303.422	241.088	213.71	347.423	270.108	342.533	276.282	295.072
H2AFZ	ENSSSCG00000009178	234.607	214.521	119.404	198.775	117.703	114.428	320.45	122.766	101.253	202.482	165.468	262.552	208.649	237.734
HSPE1	ENSSSCG00000016078	181.326	162.262	119.025	183.087	148.212	133.959	347.177	149.225	145.851	305.542	227.639	450.663	275.884	470.167
-	ENSSSCG00000009327	283.984	295.916	177.392	224.487	174.268	179.444	254.232	156.137	164.694	268.218	237.987	322.998	255.288	281.501
ACTA2	ENSSSCG00000010447	301.555	331.432	321.657	471.43	379.493	338.248	309.941	250.678	203.684	447.225	260.7	405.269	267.265	294.114
HNRNPA1	ENSSSCG00000000288	285.69	289.539	174.43	187.61	175.356	166.12	230.63	200.133	196.021	276.066	251.72	283.468	221.471	290.508
HSPA8	ENSSSCG00000015140	181.819	181.657	180.265	230.846	153.081	160.909	239.531	177.072	176.481	259.574	232.115	283.142	238.367	229.532
HSPA5	ENSSSCG00000005601	283.978	282.203	214.598	183.574	211.567	177.734	218.286	214.599	181.476	119.032	235.886	161.232	231.599	188.792
TCAP	ENSSSCG00000017500	34.8126	22.1978	3.05651	1.28384	2.32334	2.09471	3.16021	2.91221	0.913661	0.850081	2.14755	2.78882	7.32836	1.04008
SELENOM	ENSSSCG00000029781	312.39	298.781	288.932	368.997	322.959	280.961	322.814	281.862	231.898	385.167	184.968	346.063	206.788	337.491
PCOLCE	ENSSSCG00000027466	335.108	306.963	373.829	264.016	403.12	358.969	265.156	360.129	309.38	314.443	207.384	230.413	203.622	211.149
CCNG1	ENSSSCG00000017024	106.698	111.131	177.063	307.81	203.147	227.871	443.721	255.419	277.82	453.224	424.843	519.085	432.538	457.175
CTSD	ENSSSCG00000040793	381.788	321.49	441.161	399.319	439.097	409.39	200.157	330.386	285.668	218.043	204.431	209.919	222.42	251.486
PRDX6	ENSSSCG00000022742	154.452	137.965	372.526	435.825	452.584	454.372	283.652	254.987	272.229	417.915	312.405	381.458	304.715	433.226
WFDC1	ENSSSCG00000023837	67.3026	66.1274	137.797	142.914	191.406	180.094	523.649	431.557	365.699	576.304	326.304	514.619	322.328	440.758
NDRG1	ENSSSCG00000005944	152.725	131.879	499.663	460.587	679.491	687.326	262.893	453.457	504.524	394.666	334.91	320.606	300.344	382.951
GPX3	ENSSSCG00000036438	23.6719	21.7935	112.115	116.156	89.3395	90.4488	818.616	690.2	528.721	784.967	494.223	547.273	419.683	436.63
STPG4	ENSSSCG00000008433	154.517	151.451	206.338	277.262	238.431	233.323	380.153	202.004	213.085	355.657	350.814	531.883	441.323	494.03
ATP5F1D	ENSSSCG00000035532	211.075	181.753	147.942	185.652	157.102	146.8	210.302	158.467	147.11	240.064	119.28	192.877	157.662	240.66
BNIP3	ENSSSCG00000024388	294.51	256.861	304.298	375.45	368.536	335.843	280.875	310.767	257.623	319.733	257.321	299	248.14	308.348
SQSTM1	ENSSSCG00000014016	229.513	213.07	290.346	320.951	295.158	314.769	225.648	281.696	262.072	286.838	242.079	249.863	246.558	332.57
CDC42EP5	ENSSSCG00000039922	363.56	318.619	278.094	364.786	286.023	242.294	313.429	285.831	201.09	303.689	165.147	286.337	269.926	373.182
CALR	ENSSSCG00000013746	360.496	328.988	242.36	199.53	271.015	216.648	236.387	244.028	218.629	186.041	228.966	187.505	209.333	174.118
HSD11B1L	ENSSSCG00000030546	210.994	156.741	155.057	261.624	203.383	185.119	487.61	208.622	162.311	367.791	210.795	394.839	215.683	310.696
CKM	ENSSSCG00000036132	32.2298	26.8408	0.384949	0.616711	0.260473	0.190534	0.533533	0.481712	0.140641	0.284619	0.431615	1.06428	5.24739	7.57913
ERBB3	ENSSSCG00000020725	181.259	144.721	131.982	262.967	171.072	174.216	673.636	189.312	158.294	374.559	277.549	478.985	344.226	356.991
FSTL1	ENSSSCG00000039426	352.296	363.944	300.535	239.174	329.37	306.995	309.225	265.266	327.762	238.679	309.87	287.317	338.394	340.75
COX5B	ENSSSCG00000008195	128.234	107.204	95.6689	143.084	110.361	100.076	274.34	108.769	77.2373	173.944	109.382	204.013	105.252	216.107
RPL37	ENSSSCG00000033326	173.263	121.859	137.248	235.201	169.817	153.462	585.481	191.291	119.188	292.222	254.997	435.849	268.47	408.98
FAM162A	ENSSSCG00000026990	202.653	171.787	128.501	207.724	193.276	176.085	325.373	135.109	136.908	257.558	204.696	332.639	209.083	363.547
GJA1	ENSSSCG00000004241	139.595	139.337	535.097	492.221	617.089	724.458	353.586	250.83	387.426	291.499	353.967	392.301	407.72	557.93
-	ENSSSCG00000009851	171.043	170.145	139.117	209.791	158.798	159.026	264.166	141.392	148.184	260.578	182.745	276.178	198.426	228.986
ACTC1	ENSSSCG00000004803	6.21721	3.14773	0.274023	0.268776	0.14536	0.234744	0.147971	0.148609	0.204779	0.0342751	0.161235	3.036	7.78043	8.28341
-	ENSSSCG00000013906	199.99	176.842	175.083	280.621	204.951	189.638	318.671	211.239	164.258	319.589	192.05	328.577	237.211	310.223
EIF4A2	ENSSSCG00000011803	160.432	156.776	175.996	221.406	220.645	238.991	338.792	185.523	245.541	344.897	302.824	409.131	335.235	361.828
PSMB4	ENSSSCG00000034984	189.432	183.87	151.393	224.311	157.364	147.869	273.829	153.044	128.865	260.843	179.745	297.612	192.026	196.946
CTSH	ENSSSCG00000001770	131.047	133.617	353.791	446.723	464.052	466.786	402.554	291.414	350.49	473.874	305.777	469.817	326.819	556.558
-	ENSSSCG00000010517	192.817	208.19	230.335	303.712	245.757	244.143	257.981	220.548	223.06	355.398	227.41	327.229	256.562	286.51
-	ENSSSCG00000027746	197.466	201.621	171.001	208.301	175.178	167.252	201.878	167.115	157.828	231.26	190.968	251.116	208.994	239.619
-	ENSSSCG00000001930	257.068	256.608	260.354	279.387	290.259	262.067	218.122	291.555	267.733	333.227	211.229	247.293	201.134	236.193
-	ENSSSCG00000013992	202.39	198.495	192.591	252.466	212.786	215.595	225.993	187.024	188.775	271.714	227.09	240.731	228.297	284.217
-	ENSSSCG00000003046	199.499	187.973	183.284	266.913	202.824	180.72	293.677	202.517	161.782	323.691	186.924	302.52	276.195	329.771
LUM	ENSSSCG00000000916	202.801	214.125	251.446	257.475	325.632	340.645	342.43	232.947	263.97	324.864	329.586	396.72	400.116	354.912
SELENOF	ENSSSCG00000030125	196.646	199.117	175.831	248.468	189.465	167.015	326.556	187.909	166.58	273.993	206.593	289.325	240.88	345.83
NOP53	ENSSSCG00000022774	203.214	177.247	235.349	303.653	238.733	223.977	282.985	267.66	212.488	362.105	198.363	313.453	194.771	345.783
-	ENSSSCG00000004578	177.191	181.766	163.128	202.596	180.295	169.26	262.02	218.152	196.131	341.715	239.066	366.434	239.256	311.065
UBL5	ENSSSCG00000023331	167.995	138.738	131.213	207.04	166.506	162.672	336.71	140.3	130.548	270.776	177.001	321.623	207.029	243.306
TXNIP	ENSSSCG00000031262	173.873	181.322	223.171	291.446	217.87	258.376	375.385	385.453	400.79	303.805	403.109	306.099	357.675	297.803
COX7A2	ENSSSCG00000004480	142.741	106.233	96.2233	178.028	129.542	119.349	354.821	114.639	91.7215	162.585	165.381	293.247	215.125	213.335
EIF4G2	ENSSSCG00000013405	228.517	244.147	184.555	215.339	180.213	194.97	230.198	187.222	191.314	189.535	254.723	212.53	282.175	210.968
HSPB1	ENSSSCG00000039962	222.629	192.022	133.901	191.781	172.329	150.881	154.839	161.087	110.694	165.617	111.552	148.624	135.361	172.07
-	ENSSSCG00000006777	292.223	269.991	206.988	275.498	209.239	191.037	222.998	171.012	147.525	223.043	130.017	187.954	157.553	266.565
EIF3F	ENSSSCG00000039647	195.096	181.311	178.696	266.13	185.057	173.951	256.667	244.945	173.621	337.682	161.446	263.172	222.202	226.681
-	ENSSSCG00000044051	315.59	284.231	543.122	128.233	588.996	393.201	115.431	425.064	474.611	129.833	166.996	95.5904	119.897	75.0665
KARS1	ENSSSCG00000002704	181.23	185.209	160.941	236.113	176.861	183.566	243.678	206.855	202.153	355.509	232.514	308.888	243.997	272.684
LAPTM4A	ENSSSCG00000008602	173.985	176.365	195.491	269.154	220.437	230.481	329.33	193.145	201.219	255.464	252.704	299.144	310.118	320.723
CDKN1A	ENSSSCG00000001565	72.545	71.1924	466.973	441.722	473.772	445.942	347.483	388.402	379.066	390.18	323.927	305.8	346.404	315.967
PPP1R14B	ENSSSCG00000037999	185.655	206.868	143.776	167.104	153.732	130.644	188.501	153.441	119.793	218.754	136.657	206.685	190.562	209.542
COX5A	ENSSSCG00000024316	132.347	128.058	95.2354	136.03	109.106	98.6602	130.143	110.577	100.31	182.519	135.935	204.084	90.8694	197.698
BCAP31	ENSSSCG00000012772	198.852	190.844	181.012	222.509	203.024	184.35	224.183	190.373	162.168	222.262	162.818	223.448	197.665	255.843
-	ENSSSCG00000038713	221.638	214.038	201.954	206.559	190.835	177.325	133.538	182.978	157.288	172.136	119.085	140.68	115.838	128.417
LMNA	ENSSSCG00000006496	151.184	141.686	275.074	242.385	264.219	254.812	216.525	346.776	311.999	334.429	227.421	252.829	218.378	253.733
ATP5MC1	ENSSSCG00000017544	83.9387	68.6129	54.4405	78.1351	53.0113	50.2153	119.207	70.8285	42.973	110.043	48.6499	106.034	73.5145	149.078
PGK1	ENSSSCG00000012440	185.193	177.791	177.822	232.672	213.877	217.751	268.841	163.372	175.771	267.595	214.271	277.831	210.808	250.353
COL4A2	ENSSSCG00000009545	304.107	247.961	451.732	102.317	469.268	293.02	94.0981	355.059	370.419	99.2712	146.375	88.2409	123.587	96.3492
SFRP2	ENSSSCG00000009004	345.806	341.458	548.056	445.06	431.002	391.427	130.676	197.155	176.835	116.345	148.446	135.999	209.069	179.75
CYC1	ENSSSCG00000031918	136.325	128.544	102.311	127.707	101.712	87.8719	125.804	116.375	90.2426	147.63	95.2858	146.032	70.1321	140.336
-	ENSSSCG00000032166	98.2794	86.362	72.6168	114.83	85.6455	81.0191	243.536	84.9944	76.0291	151.645	122.218	204.541	120.653	210.19
ROMO1	ENSSSCG00000007308	127.831	79.6932	91.8751	146.029	139.741	113.437	291.515	111.296	90.4051	166.754	132.815	215.802	124.195	236.175
NCL	ENSSSCG00000016275	158.212	162.644	156.929	141.039	149.232	151.452	156.075	170.888	175.673	181.782	192.823	164.007	166.119	126.286
UQCRQ	ENSSSCG00000014289	87.8319	78.121	72.0876	94.6276	83.2537	67.3274	191.142	83.3246	78.6877	161.669	90.8188	174.407	121.648	204.05
TUBA1B	ENSSSCG00000000190	231.247	245.991	120.951	165.499	121.401	107.023	157.555	129.88	100.746	167.261	126.193	149.416	145.606	132.181
POSTN	ENSSSCG00000009361	325.167	340.626	280.711	270.179	223.461	198.342	239.146	137.117	131.344	155.054	248.881	224.186	344.486	251.451
HSP90B1	ENSSSCG00000000849	278.747	264.887	147.506	115.418	171.673	147.372	163.756	130.702	138.658	107.284	170.247	158.278	173.845	166.812
PSMA7	ENSSSCG00000033332	166.861	158.304	129.819	172.475	130.69	127.331	192.376	143.119	114.084	194.796	128.196	208.846	127.09	236.677
EMP1	ENSSSCG00000036723	174.688	172.077	232.307	203.832	271.134	266.578	281.193	281.634	319.469	264.072	328.678	279.095	278.16	268.273
CRYAB	ENSSSCG00000036724	70.4304	43.5461	48.1479	53.713	53.8055	55.0929	55.131	52.7221	50.9309	87.6768	44.9959	75.091	36.7585	74.2229
SAT1	ENSSSCG00000012173	187.257	167.072	146.593	222.555	160.086	176.835	232.731	123.808	141.421	212.484	195.495	258.654	203.724	263.586
SUMO2	ENSSSCG00000017212	167.713	156.346	135.572	208.345	144.787	155.093	241.857	120.523	124.191	210.731	190.463	258.314	224.722	310.18
-	ENSSSCG00000020790	147.753	125.711	115.412	158.567	140.577	95.405	411.591	129.068	82.952	184.294	128.048	227.057	144.251	262.421
EEF1A2	ENSSSCG00000040401	79.5563	65.9876	4.85357	2.75333	4.20895	4.33533	4.67047	8.03306	6.64602	17.4649	4.63202	12.7674	3.23963	12.1868
PARK7	ENSSSCG00000003385	136.328	133.738	134.185	178.976	153.677	137.365	229.204	143.443	123.909	230.326	164.509	251.29	198.448	218.514
RRAS	ENSSSCG00000003183	184.464	166.579	197.614	266.756	207.746	179.408	203.326	207.034	166.064	254.617	149.335	210.052	162.403	292.713
-	ENSSSCG00000039506	152.374	142.4	158.979	223.706	173.356	145.717	266.868	126.417	113.066	230.925	155.186	265.688	156.165	255.131
ARPC1B	ENSSSCG00000007625	225.291	230.382	207.14	285.686	198.103	185.667	190.812	171.87	148.893	248.957	137.408	238.105	144.692	248.644
NDUFB9	ENSSSCG00000005976	118.346	108.283	80.6097	117.606	89.4448	81.371	212.192	81.6541	75.7916	150.759	105.641	166.58	95.1547	165.634
-	ENSSSCG00000044426	195.752	190.848	189.312	173.154	224.448	218.938	191.038	179.885	201.602	171.972	288.225	232.688	220.33	96.2363
CTSZ	ENSSSCG00000007522	227.139	211.467	267.547	318.324	275.09	265.5	180.61	232.447	207.57	243.607	166.976	231.847	216.055	241.332
-	ENSSSCG00000021591	151.485	164.702	90.3722	133.531	71.3067	65.9677	189.573	98.2908	69.0065	154.646	138.361	182.073	164.672	126.045
ID1	ENSSSCG00000037016	160.066	190.659	141.777	165.361	116.231	100.412	239.381	200.301	96.6016	221.611	183.618	202.768	211.696	169.96
NDUFS5	ENSSSCG00000003653	116.513	109.386	87.0629	139.741	110.414	103.229	276.18	109.672	97.4631	212.705	120.917	250.146	151.326	254.387
SNRPE	ENSSSCG00000023562	130.9	114.093	75.9614	126.398	101.56	92.7246	245.241	83.4614	75.9032	172.397	145.688	278.499	164.782	163.465
GNB2	ENSSSCG00000007669	223.346	227.289	184.492	243.703	196.024	178.379	161.039	169.733	160.539	231.074	131.986	181.916	161.037	187.612
-	ENSSSCG00000032028	172.683	169.316	153.846	179.03	175.92	178.146	208.805	193.009	196.567	239.779	214.556	230.19	193.961	206.709
TUBB	ENSSSCG00000001379	232.785	230.566	132.701	144.065	162.025	135.923	108.239	147.844	135.551	152.624	123.666	124.662	114.427	137.782
SERP1	ENSSSCG00000037465	139.713	141.983	134.795	196.346	133.636	140.606	228.575	164.591	143.609	199.438	202.994	215.687	238.854	270.21
TPM1	ENSSSCG00000004570	166.033	168.927	104.996	130.785	89.6541	86.1654	85.2311	58.4577	58.6816	90.0243	77.0175	93.9099	92.7606	82.3051
MDH2	ENSSSCG00000025486	111.742	107.345	85.1774	96.9978	85.455	85.4653	101.013	104.373	98.2239	143.291	97.5908	120.273	116.091	99.719
NDUFB10	ENSSSCG00000030328	132.462	114.352	93.2703	144.378	102.356	98.2882	169.272	109.508	95.9977	184.115	103.206	186.012	130.717	217.139
SLC16A3	ENSSSCG00000024018	234.124	207.645	256.202	196.655	276.809	228.878	185.762	244.699	219.676	174.717	137.908	147.267	150.998	187.107
MRPL12	ENSSSCG00000033148	138.64	137.452	122.947	165.27	122.449	118.871	202.969	142.663	129.9	263.758	125.063	220.327	150.131	224.952
HMGA1	ENSSSCG00000032242	166.065	151.307	185.721	177.691	161.423	137.201	186.598	275.591	224.943	232.585	169.357	158.764	159.037	111.071
PRRX2	ENSSSCG00000005680	165.534	214.279	184.636	273.004	192.725	172.09	196.627	176.989	124.745	230.492	136.075	214.276	215.822	300.472
TMA7	ENSSSCG00000011351	123.403	108.223	90.7619	145.8	116.359	105.637	292.78	93.7407	73.5189	150.998	144.154	244.804	131.729	231.339
IGFBP4	ENSSSCG00000017472	307.821	300.302	514.634	457.133	399.55	368.703	129.338	98.3705	92.8905	99.7466	83.0058	100.12	166.384	167.022
CRLF1	ENSSSCG00000013909	145.923	140.97	235.819	181.287	246.618	198.913	217.151	242.82	189.767	221.788	168.494	171.514	160.943	205.032
TALDO1	ENSSSCG00000012847	170.964	162.479	140.958	189.958	146.791	141.809	163.692	134.043	111.474	190.048	114.43	171.229	125.77	192.424
EIF6	ENSSSCG00000022864	167.797	150.77	133.712	187.945	142.163	122.832	179.764	132.017	115.448	187.125	153.951	204.138	191.643	241.557
RPL37A	ENSSSCG00000036716	141.766	93.8909	86.6599	149.979	125.866	105.693	325.161	130.763	80.7035	173.647	144.912	264.542	195.756	245.385
PFN1	ENSSSCG00000017907	178.538	182.272	145.059	174.929	134.461	118.31	151.398	137.775	121.137	182.904	119.012	168.435	140.704	130.265
CCT7	ENSSSCG00000008303	143.386	144.83	134.102	154.023	143.064	136.521	157.557	155.576	144.294	226.838	158.858	218.873	154.726	159.573
ANXA5	ENSSSCG00000009097	141.681	145.848	129.582	176.934	157.483	153.198	225.717	155.292	162.311	264.364	198.337	294.139	203.646	242.091
PCBP1	ENSSSCG00000027224	147.199	147.056	162.763	189.522	156.355	156.859	159.453	174.911	158.48	181.906	152.472	154.014	163.761	218.756
SNRPD2	ENSSSCG00000033500	121.811	102.224	99.3539	180.178	119.839	108.926	330.948	136.123	103.663	218.501	137.412	239.356	164.081	234.679
PSMB1	ENSSSCG00000027257	127.813	121.899	114.161	155.928	114.008	111.574	195.498	115.207	105.526	197.831	147.723	201.286	165.882	222.476
CCT3	ENSSSCG00000006487	137.25	134.225	111.788	132.345	118.008	111.432	143.295	133.433	124.719	198.754	140.352	196.717	132.152	151.575
MIF	ENSSSCG00000010067	152.172	125.961	134.764	199.081	162.418	152.587	204.577	152.112	110.484	206.813	119.508	208.13	154.924	211.643
GDI2	ENSSSCG00000011137	186.388	185.15	178.484	181.115	177.569	173.207	150.514	180.38	174.162	207.341	140.923	149.606	116.43	176.809
-	ENSSSCG00000013318	180.723	185.226	157.045	150.036	153.738	148.47	224.72	159.451	163.132	211.268	194.505	244.413	218.224	224.999
RTRAF	ENSSSCG00000005029	125.672	109.565	77.0734	134.56	93.8169	95.0664	226.242	103.855	102.374	196.224	156.019	236.659	154.427	195.681
BRK1	ENSSSCG00000011565	137.711	132.115	107.432	168.116	108.09	109.546	226.01	116.331	106.035	209.881	153.213	236.913	190.209	225.585
ARPC3	ENSSSCG00000009821	135.511	140.116	102.263	152.496	112.894	109.903	258.178	102.99	97.1376	193.53	152.177	209.565	213.963	133.032
-	ENSSSCG00000012961	153.874	135.88	105.54	144.371	107.383	98.4616	157.359	103.92	85.0624	173.004	121.107	178.198	143.382	152.897
IL33	ENSSSCG00000005203	49.8247	50.5126	274.734	341.892	312.075	346.532	284.913	175.57	224.412	294	313.033	387.413	359.003	373.171
NDUFB4	ENSSSCG00000031913	114.503	89.982	99.1184	131.709	113.985	100.864	157.34	104.396	87.0907	172.343	114.021	222.754	131.92	125.132
-	ENSSSCG00000039894	135.416	130.569	176.376	173.558	189.806	166.98	222.417	241.412	235.169	270.25	180.593	223.057	170.23	209.604
CSRP3	ENSSSCG00000013354	13.3235	7.13182	0.654968	0.172961	0.299333	0.388443	0.999823	1.14759	0	0.352904	1.45259	1.46528	1.8299	0.153395
-	ENSSSCG00000005453	94.7645	86.0181	110.906	171.348	141.426	134.117	282.589	116.736	104.083	261.566	193.542	334.569	246.903	319.87
HNRNPK	ENSSSCG00000022760	150.339	164.103	138.681	169.809	147.564	154.443	186.208	143.693	152.538	193.248	174.617	193.779	172.007	181.114
JUNB	ENSSSCG00000013735	208.96	231.642	315.426	315.293	151.312	140.117	203.491	239.336	123.015	123.322	183.597	114.677	207.569	206.51
SELENOP	ENSSSCG00000021208	90.1737	100.151	62.8428	101.529	71.1882	83.7097	352.403	183.263	201.928	280.193	275.264	302.8	265.782	230.391
-	ENSSSCG00000039222	132.559	140.875	184.216	207.22	174.818	173.432	209.646	185.431	183.128	202.107	202.531	232.532	212.2	257.016
-	ENSSSCG00000033744	105.125	85.7702	88.7085	136.992	115.131	91.5093	371.973	108.645	78.9756	185.56	132.021	254.63	142.737	260.316
CTSV	ENSSSCG00000011171	104.917	100.145	128.654	150.055	166.745	175.558	288.19	164.503	194.138	234.13	238.028	269.806	219.095	252.776
FKBP10	ENSSSCG00000017422	199.075	184.902	225.961	146.044	269.52	232.296	153.752	214.053	228.524	224.576	134.076	184.824	152.328	188.16
SARS1	ENSSSCG00000006835	174.203	180.591	122.406	141.885	111.524	112.298	121.254	113.046	118.773	166.827	121.388	160.657	119.925	132.183
EIF3E	ENSSSCG00000006033	109.404	108.131	87.3316	153.96	104.014	115.167	225.36	112.823	118.969	227.982	202.308	284.279	233.604	217.898
S100A11	ENSSSCG00000006610	173.015	153.206	127.952	173.692	139.47	133.648	192.84	133.675	119.684	235.958	136.273	228.022	147.759	174.098
PRXL2A	ENSSSCG00000010340	60.7788	65.7918	136.462	165.045	173.544	165.766	356.201	204.946	204.633	328.506	282.505	338.486	224.974	407.837
PSAP	ENSSSCG00000010281	186.585	172.031	206.673	165.232	209.602	192.476	157.843	215.895	210.773	142.865	159.246	134.65	153.038	167.273
YWHAQ	ENSSSCG00000008638	150.816	166.626	134.35	167.428	132.378	127.944	148.844	129.756	117.664	172.368	150.098	182.951	148.419	165.144
ATF4	ENSSSCG00000000084	162.171	148.261	99.7836	109.609	106.449	103.865	122.409	90.1294	90.4313	117.59	98.9399	111.888	89.6974	123.451
NUDT3	ENSSSCG00000031593	123.462	110.288	97.8816	160.895	108.95	107.392	200.269	112.451	95.8176	213.269	145.096	222.218	180.86	220.435
ILK	ENSSSCG00000023272	171.106	172.582	154.42	179.42	157.442	143.592	121.322	136.539	129.847	174.877	101.135	172.283	143.778	158.222
DHRS4	ENSSSCG00000002013	92.9138	93.1498	56.9364	64.1789	63.5479	56.144	146.549	98.0174	87.2408	171.074	89.7966	154.604	100.298	126.646
-	ENSSSCG00000006395	137.905	153.698	123.737	149.204	127.114	121.641	155.674	162.458	145.657	237.709	140.105	195.978	130.513	182.198
ATP5IF1	ENSSSCG00000027072	87.6778	54.2591	48.9167	82.9915	68.9052	68.4751	172.174	65.8813	44.7014	77.3576	84.4964	131.012	108.718	110.216
CEBPB	ENSSSCG00000034207	137.18	142.763	306.133	303.254	240.548	216.135	192.394	223.866	162.553	150.101	159.427	140.167	199.792	209.136
-	ENSSSCG00000018083	32.5696	11.3017	20.6362	5.44953	8.25226	7.47925	4.50024	12.0524	8.30395	4.16964	17.1627	33.3429	198.59	76.1208
EIF3D	ENSSSCG00000000141	128.564	125.288	124.736	146.604	133.792	129.837	149.331	150.234	138.059	221.116	122.289	200.927	138.995	140.99
HSPA9	ENSSSCG00000014338	98.6098	97.1785	82.4529	89.8526	85.2868	88.9285	104.453	93.6629	97.6508	111.311	121.652	112.761	92.2932	92.5607
UQCRC1	ENSSSCG00000011356	86.0896	86.7777	69.8505	87.2582	70.6278	67.8986	97.5698	76.3881	71.7865	126.249	73.873	107.277	93.0723	110.713
CD81	ENSSSCG00000039243	172.252	184.33	175.4	178.593	189.526	167.881	157.622	195.345	168.925	172.201	120.641	137.659	116.697	118.028
-	ENSSSCG00000012427	91.0943	63.7742	81.6917	135.836	105.069	93.3094	399.862	116.224	76.2258	173.089	158.759	255.752	173.51	222.669
ERH	ENSSSCG00000002307	103.435	114.01	77.7068	114.341	68.9571	72.8638	168.302	79.0458	76.3613	155.602	115.745	198.657	144.934	220.343
ATP6V1F	ENSSSCG00000016577	120.76	106.923	117.603	152.798	118.43	111.729	149.425	90.2322	85.9932	151.891	104.146	173.01	156.656	176.018
ITM2C	ENSSSCG00000016267	168.539	162.07	227.768	206.337	227.774	200.971	175.141	199.04	194.967	218.944	165.878	215.012	164.951	270.145
CTSB	ENSSSCG00000023666	149.636	140.617	205.095	195.061	187.238	190.761	174.463	201.907	192.692	174.462	160.762	145.79	151.513	172.684
-	ENSSSCG00000006581	157.827	150.033	147.388	208.54	154.955	139.355	162.893	134.308	123.216	180.755	126.163	164.66	141.515	176.061
RPL36AL	ENSSSCG00000005006	95.9694	84.6605	72.5861	114.595	87.9385	79.7846	289.724	97.701	85.2053	180.711	165.118	251.945	174.657	215.693
NPC2	ENSSSCG00000002366	109.365	109.246	125.272	159.718	153.104	159.536	217.832	177.741	196.515	255.839	170.672	257.467	238.848	258.275
-	ENSSSCG00000014910	70.5502	63.128	95.4483	128.383	97.3219	90.4795	406.752	115.338	89.1616	233.475	175.352	328.455	97.2188	246.34
-	ENSSSCG00000027538	126.976	99.3102	78.7502	129.218	91.4374	77.3247	202.931	90.1932	61.838	134.262	99.6941	175.165	81.4678	288.206
CCN1	ENSSSCG00000006940	119.463	108.813	233.958	120.885	215.936	188.694	127.782	174.434	225.547	140.912	128.743	144.51	129.937	168.663
-	ENSSSCG00000032623	101.152	159.595	126.645	189.314	149.413	157.362	215.277	169.404	179.338	215.113	118.658	216.301	146.957	268.059
COX4I1	ENSSSCG00000029034	119.954	59.9815	46.2419	93.4053	78.8516	80.7219	119.932	76.3931	36.2622	64.7572	76.9167	76.5585	87.8223	51.5957
UQCR10	ENSSSCG00000024550	59.3659	53.5044	58.6583	88.2031	72.5391	63.817	126.247	62.4162	48.1995	102.099	76.5252	121.652	98.1877	184.25
COL5A2	ENSSSCG00000016035	180.905	159.859	356.698	139.141	411.203	332.206	130.006	188.756	251.921	89.3413	162.844	125.981	163.606	137.948
SNU13	ENSSSCG00000000058	108.477	107.198	97.426	127.625	101.156	105.408	142.376	106.158	95.8468	146.425	120.569	170.201	110.545	144.378
CD151	ENSSSCG00000012840	154.293	132.506	193.029	213.09	177.108	152.962	149.38	161.467	143.731	167.735	108.378	146.285	171.422	185.632
CYCS	ENSSSCG00000016714	71.4264	62.9065	33.1451	44.6466	34.0724	32.9145	76.5123	34.2566	31.2187	59.6458	57.9577	81.5595	76.012	53.1351
SLC25A4	ENSSSCG00000015790	11.6651	10.9421	7.50756	9.11454	9.09255	7.90085	15.2228	9.53172	8.31351	11.8517	12.4149	10.624	13.6565	29.84
HMOX1	ENSSSCG00000039745	45.1418	47.1833	83.0379	101.026	122.817	112.735	123.215	151.567	154.583	207.52	121.543	154.258	103.671	129.932
LOXL2	ENSSSCG00000033608	243.601	229.919	261.565	117.209	305.825	252.611	99.569	183.186	180.512	91.7908	126.367	103.868	121.511	125.038
MRPL41	ENSSSCG00000033694	119.24	106.022	117.182	165.245	113.642	100.5	233.522	149.219	111.344	175.35	118.45	152.033	41.9814	153.459
-	ENSSSCG00000022925	148.188	134.646	193.308	147.68	303.868	310.549	98.1695	135.589	228.235	102.21	128.703	116.319	138.296	161.109
VDAC2	ENSSSCG00000010320	104.524	102.578	83.6974	117.688	94.6237	99.2353	144.569	93.6539	100.475	151.501	119.299	154.837	104.404	129.062
TMBIM6	ENSSSCG00000029652	120.204	118.608	133.535	163.492	145.478	147.696	180.135	135.252	131.297	162.596	139.92	185.297	154.791	175.471
OSTC	ENSSSCG00000009145	110.034	116.838	83.3986	123.458	98.4388	89.9392	191.384	84.1565	94.4783	183.67	158.402	244.597	157.829	200.928
-	ENSSSCG00000009772	114.617	110.061	97.1251	126.182	107.33	106.57	164.401	93.5202	100.256	126.817	151.515	176.032	204.056	168.153
ENO3	ENSSSCG00000017904	15.3937	13.8108	2.15921	1.76553	1.64728	1.64792	1.76219	2.34731	1.0415	1.97647	2.40524	2.06152	1.40608	6.45449
CHMP2A	ENSSSCG00000029362	127.599	116.123	126.203	155.374	141.701	131.111	140.25	128.841	106.73	177.75	104.694	167.568	119.743	196.682
PSMB3	ENSSSCG00000037606	91.5661	80.1714	76.2627	93.6641	78.5372	70.7976	135.997	76.9059	70.0475	127.688	85.4807	156.454	109.006	86.8599
DDOST	ENSSSCG00000003505	149.883	147.033	132.495	124.875	139.752	133.23	149.062	154.756	141.219	149.732	126.515	120.729	125.621	148.803
GPI	ENSSSCG00000002873	147.644	137.224	160.736	201.453	190.457	184.367	106.114	164.4	156.621	182.385	121.615	149.796	107.298	127.454
HSBP1	ENSSSCG00000031892	113.358	110.333	98.541	133.277	99.554	91.5229	188.265	82.2593	77.072	159.452	112.973	193.642	138.58	200.993
HSPD1	ENSSSCG00000016077	89.4484	89.4121	83.4439	88.8556	93.8703	97.0335	128.619	98.4147	118.398	162.657	138.092	165.098	130.438	174.405
-	ENSSSCG00000017913	110.172	98.1826	85.043	106.093	83.5993	77.5688	141.311	85.4559	66.4969	131.429	92.4063	149.293	122.141	124.116
SERPING1	ENSSSCG00000013181	85.4387	76.37	162.764	140.739	144.966	137.753	208.077	227.712	217.325	224.743	158.744	144.974	163.59	147.351
SNX3	ENSSSCG00000004385	112.741	114.484	100.365	138.988	120.206	122.358	161.654	92.0595	105.929	146.291	127.28	193.534	153.975	179.164
TLE5	ENSSSCG00000032265	99.0241	101.59	115.491	131.007	116.024	105.143	137.675	120.351	117.636	138.259	100.78	138.397	102.764	149.896
CLU	ENSSSCG00000009668	163.378	149.822	245.963	258.2	243.912	238.311	142.168	127.369	157.272	143.642	110.471	140.119	157.773	161.245
RAC1	ENSSSCG00000035090	143.323	171.704	121.548	164.633	134.721	130.903	125.979	149.454	128.73	137.732	118.764	119.882	105.647	97.7103
CAP1	ENSSSCG00000003672	136.533	151.658	133.112	152.918	144.589	139.126	145.029	132.517	132.064	155.913	157.345	132.562	132.137	134.481
IFITM3	ENSSSCG00000038912	125.065	113.237	131.041	189.077	157.538	145.433	155.749	125.173	130.5	195.355	115.164	227.962	139.441	145.126
ANGPTL4	ENSSSCG00000013599	187.045	164.929	157.042	127.858	157.26	145.62	116.713	140.707	115.525	96.6334	102.421	89.32	102.918	120.941
RRAD	ENSSSCG00000036060	96.968	74.1027	67.4483	61.4091	15.2952	15.5831	66.5602	112.124	30.8979	22.1077	79.5156	22.9364	71.8444	14.702
MYL9	ENSSSCG00000036402	72.5997	72.0689	104.2	123.357	128.449	103.713	99.6486	101.739	88.5136	136.304	80.4494	97.5711	90.6316	77.0939
RAN	ENSSSCG00000009746	92.3519	93.4619	64.1018	95.8758	68.116	68.5345	126.273	75.7342	71.1416	140.067	109.848	161.104	125.394	147.997
VEGFA	ENSSSCG00000001695	122.582	117.95	319.816	160.732	391.767	373.861	92.2429	140.307	195.391	85.27	100.951	122.25	127.92	148.837
-	ENSSSCG00000002907	69.2106	62.4021	51.106	77.1147	63.3422	55.4892	91.0919	55.4294	47.962	99.7356	67.9535	114.159	87.6915	111.653
GARS1	ENSSSCG00000016677	167.672	163.785	103.455	116.666	116.876	107.117	109.5	108.318	118.963	167.007	117.28	149.02	110.838	146.737
-	ENSSSCG00000039071	168.093	182.976	107.6	133.004	97.9709	87.7191	115.125	80.2809	78.968	114.696	89.5571	127.34	91.6225	126.908
ATP6V0B	ENSSSCG00000039267	114.533	99.8855	115.062	147.904	123.354	123.983	138.509	119.515	104.743	145.504	105.319	152.059	108.012	134.401
ITGB1	ENSSSCG00000011101	224.617	225.679	152.593	112.579	162.853	143.678	129.267	109.514	122.34	71.2917	138.09	104.336	158.519	134.035
ISG15	ENSSSCG00000040575	371.202	242.96	45.7818	63.579	43.0454	33.7435	30.2027	21.9163	26.144	22.4628	21.7028	39.9168	39.6531	49.5752
EMP3	ENSSSCG00000023377	95.4579	92.2295	136.536	163.007	171.098	164.925	183.357	169.359	149.688	209.143	126.657	184.574	150.935	140.66
ANXA1	ENSSSCG00000005267	98.2084	103.463	77.0067	114.595	86.7042	84.4329	192.801	100.319	111.885	206.537	160.652	257.778	183.011	211.413
RARRES2	ENSSSCG00000035419	162.519	156.645	109.155	165.362	105.654	98.4417	235.815	127.198	101.077	194.489	100.861	180.817	126.671	147.399
COX17	ENSSSCG00000011893	84.1188	53.3041	52.5246	71.3264	77.6826	56.8205	184.396	60.7948	46.4862	107.595	67.6517	154.237	76.504	71.9087
MRPL20	ENSSSCG00000033374	98.9552	95.161	69.7275	95.2577	68.6371	67.3373	129.822	77.5453	64.1451	111.572	88.6051	139.96	108.556	141.566
-	ENSSSCG00000002449	49.2071	29.427	46.6711	63.852	79.681	55.4722	175.601	51.7582	31.0167	75.2436	51.9585	133.565	47.6079	164.906
ANAPC16	ENSSSCG00000037728	96.4603	103.833	83.4217	137.873	101.68	104.196	179.329	87.1642	95.1782	163.367	110.379	218.13	178.822	134.104
MANF	ENSSSCG00000032914	93.9963	91.3759	52.4048	70.9895	52.7181	52.6064	117.177	60.3188	52.6704	104.582	76.1845	106.359	59.5738	111.298
-	ENSSSCG00000044397	42.7333	40.7353	198.574	219.77	174.419	146.096	256.253	233.169	158.892	217.189	173.074	218.66	217.79	296.055
UBE2M	ENSSSCG00000037734	99.7582	103.468	108.142	111.338	97.2156	85.1341	103.152	106.082	93.2329	121.678	89.1265	110.932	73.3651	159.99
-	ENSSSCG00000032129	64.9719	50.0544	36.7002	61.1661	46.4217	46.3698	122.414	39.0192	39.5991	87.4502	70.6795	117.08	75.7445	106.433
FBL	ENSSSCG00000030510	88.4755	88.2447	64.5265	73.0125	60.7115	53.1064	101.732	91.155	79.2581	128.28	85.3367	135.043	82.5716	124.52
PRDX3	ENSSSCG00000010682	79.7194	82.3202	64.7384	102.593	75.1929	75.5316	126.365	81.223	72.8272	132.462	100.276	145.192	85.8213	124.767
YWHAZ	ENSSSCG00000006062	132.251	131.761	123.204	142.503	122.069	123.651	144.325	104.29	113.703	120.287	154.621	139.423	162.633	127.874
ACTN1	ENSSSCG00000036702	153.672	159.787	187.99	154.221	180.488	157.202	84.4775	179.853	158.28	136.431	130.285	99.2848	105.661	119.727
SRGN	ENSSSCG00000023374	63.0942	58.6689	101.093	171.106	104.007	127.517	223.346	116.859	126.974	207.44	182.925	270.358	174.561	265.888
PCP4	ENSSSCG00000037110	7.12298	3.56213	1.38866	0.417135	0.644562	0.892209	0.656136	0.384398	0	0.303967	0	1.96326	9.54448	9.51295
NPM1	ENSSSCG00000016998	82.1866	83.7523	56.4157	76.3599	65.6746	67.0519	147.628	79.3676	83.5706	152.761	130.71	178.098	123.089	155.166
SURF4	ENSSSCG00000040710	125.57	120.247	121.67	116.117	113.965	101.885	132.233	131.333	102.5	119.877	106.245	115.243	97.1085	119.288
ADM	ENSSSCG00000013408	52.7793	47.3939	91.5935	81.6273	248.346	253.593	131.015	111.003	213.651	215.909	108.703	242.689	137.291	248.841
PSMD8	ENSSSCG00000036658	99.0823	98.3953	85.5321	118.803	91.8322	75.2538	114.078	82.5195	68.0476	129.582	85.5477	131.67	122.42	110.6
PDAP1	ENSSSCG00000033450	98.4033	103.581	96.8111	96.8851	94.4637	80.5506	108.597	93.0821	90.3026	118.253	87.9985	123.596	136.394	148.251
NUPR1	ENSSSCG00000040162	79.3567	74.8397	82.5982	118.42	103.017	100.257	213.888	109.601	117.678	124.607	130.86	133.579	153.421	223.045
GPX4	ENSSSCG00000024052	86.0305	77.9981	92.2217	135.32	108.451	100.017	147.027	96.3253	89.2868	153.029	96.899	160.856	117.536	149.716
HSP90AB1	ENSSSCG00000001701	98.6173	107.44	91.8942	110.842	105.448	107.557	138.497	124.393	138.515	208.014	126.976	180.971	123.029	141.648
FMOD	ENSSSCG00000015270	93.3514	84.848	269.993	134.191	412.972	356.205	120.002	203.736	251.469	169.237	147.324	154.99	129.862	207.176
MYH7	ENSSSCG00000002029	1.30621	1.31516	0.217618	0.0132394	0.034778	0.00943923	0.0312375	0.0644876	0.0205858	0.0434141	0.104949	0.338263	0.208439	1.18675
SEC61G	ENSSSCG00000035434	91.1197	75.148	57.3711	82.0822	65.4954	58.9617	117.94	64.185	43.4111	101.566	74.2021	171.239	134.076	170.913
SUMO3	ENSSSCG00000035795	103.896	119.223	110.807	130.773	102.391	84.5351	110.864	109.849	91.9657	126.192	87.4138	138.403	71.6098	109.023
ACO2	ENSSSCG00000000064	60.8034	64.7313	66.6718	70.137	66.6805	64.2053	34.5458	69.1754	65.5333	69.9007	48.9988	53.9428	48.633	57.8371
TOLLIP	ENSSSCG00000033033	149.516	136.49	137.241	145.549	134.957	125.734	92.0221	125.091	98.1309	134.962	81.4173	101.876	81.0288	119.172
MLF2	ENSSSCG00000000690	131.863	133.661	119.001	127.7	118.263	105.339	104.449	114.75	100.734	122.447	76.1133	106.135	76.4078	76.0007
TMEM147	ENSSSCG00000040012	76.8648	75.7538	76.9975	109.489	86.3142	76.0317	174.177	86.9399	65.413	137.687	80.3628	136.915	104.164	191.814
MRPL57	ENSSSCG00000031280	92.9177	86.2616	81.3731	109.081	75.5883	65.1356	178.856	87.1173	57.5933	127.869	84.765	135.513	94.6076	182.602
COL5A1	ENSSSCG00000005751	299.117	240.821	263.284	47.0215	272.553	166.083	34.7291	158.125	186.22	40.1802	57.0187	37.9291	49.7243	54.2437
RPL22L1	ENSSSCG00000036114	95.7958	84.0831	31.8322	57.8395	34.2197	33.0547	249.257	59.7987	50.9677	137.539	110.212	181.748	119.236	136.434
FLNA	ENSSSCG00000033299	188.067	172.135	206.331	125.593	214.89	169.315	56.0246	192.67	188.072	109.315	78.6962	69.9435	78.653	61.6503
PLAUR	ENSSSCG00000032434	145.302	143.676	116.337	119.036	119.169	123.99	103.025	97.6657	94.5113	89.4626	74.7191	87.0332	86.2735	100.223
-	ENSSSCG00000022176	183.792	182.501	105.033	107.152	93.1881	85.9768	89.0879	95.0434	78.3888	97.8706	52.5801	72.0528	68.1674	92.0604
ANXA6	ENSSSCG00000017089	135.654	142.457	126.914	132.016	120.594	104.467	103.685	127.101	110.2	160.251	96.5433	114.46	96.3723	100.974
GADD45A	ENSSSCG00000037066	45.8486	46.2487	43.746	56.8338	48.9787	48.8236	97.6158	70.2612	86.4931	128	81.0373	130.261	70.6979	88.9622
CALCOCO2	ENSSSCG00000017543	64.8486	63.7614	104.28	122.67	148.5	150.391	183.357	153.197	183.58	242.265	181.582	229.519	170.016	220.024
ARPC5	ENSSSCG00000015560	110.294	118.013	108.434	144.014	107.309	105.252	153.371	101.639	108.234	145.724	131.204	165.975	130.569	171.323
FKBP8	ENSSSCG00000013905	107.178	104.014	134.762	160.116	155.308	146.208	119.734	138.739	128.963	150.942	117.819	128.306	124.378	165.639
TRIR	ENSSSCG00000013727	120.875	101.227	79.3175	100.933	84.5883	74.0102	109.146	76.9325	65.3446	85.4495	79.7088	94.0546	88.9013	102.48
PTGES	ENSSSCG00000005688	124.312	121.289	143.348	188.438	163.986	144.884	143.924	107.088	85.6191	143.853	96.1876	132.764	140.464	151.145
TRAPPC5	ENSSSCG00000013573	74.5542	59.835	87.1848	146.608	99.0981	94.9245	188.442	98.7457	81.8002	170.437	97.2977	168.263	172.415	244.496
ARPC2	ENSSSCG00000016185	113.883	120.006	102.188	138.601	103.182	102.38	123.011	93.4093	90.6504	138.851	115.653	150.854	110.879	141.374
TSPAN6	ENSSSCG00000012481	81.6938	81.1236	121.752	173.65	168.172	167.507	152.634	97.2124	105.638	183.306	153.193	246.19	202.748	244.192
ARF4	ENSSSCG00000031791	93.8431	100.613	93.3255	125.58	96.8855	102.243	133.14	102.622	107.868	144.608	127.596	163.945	146.544	149.713
CD164	ENSSSCG00000004414	82.4533	83.4955	109.792	125.98	128.153	135.962	174.624	126.517	143.945	142.284	163.622	161.795	167.198	184.485
LAMP1	ENSSSCG00000009555	123.488	116.035	137.81	105.862	136.301	129.676	76.9338	134.219	134.056	118.53	97.7972	111.743	118.442	123.691
-	ENSSSCG00000035570	113.716	113.952	114.839	118.599	106.593	103.365	91.5554	115.621	107.426	122.586	107.671	103.584	100.166	90.6314
GSTO1	ENSSSCG00000022351	90.6809	85.5966	52.0074	75.3049	56.3627	54.383	111.79	60.6077	51.4159	102.499	70.6419	119.441	82.5316	97.1656
-	ENSSSCG00000023305	4.52355	1.56704	1.70079	5.02135	2.02096	3.78819	5.78602	7.96322	3.55884	6.25446	2.10156	2.47324	0	0
THY1	ENSSSCG00000032330	147.698	147.501	157.098	138.409	134.559	112.789	141.869	145.99	132.246	155.233	125.539	137.272	100.574	135.879
RAB2A	ENSSSCG00000006232	87.4853	88.6117	83.4108	108.708	94.5271	94.6366	135.348	78.6378	81.1687	121.113	115.333	134.05	119.024	144.994
H2AJ	ENSSSCG00000039307	55.876	50.5654	85.7567	118.227	87.3341	83.2838	241.834	112.494	92.4498	189.573	129.395	164.901	165.159	203.062
PGD	ENSSSCG00000003402	104.386	101.98	113.654	132.259	102.19	95.8094	93.9175	101.899	76.9368	111.262	80.779	91.4632	82.8056	83.7711
CYP1B1	ENSSSCG00000033844	106.611	110.296	218.096	127.501	220.092	198.318	118.394	139.237	121.096	76.9815	146.141	108.681	179.38	133.121
PNRC2	ENSSSCG00000023326	110.31	124.076	76.9665	92.9715	74.3484	79.4781	144.833	84.4807	81.6328	105.475	135.462	132.301	134.353	118.215
POLR1D	ENSSSCG00000009310	109.768	94.8496	71.4949	110.177	84.7721	80.885	138.554	88.3245	76.3983	148.447	89.7881	128.331	107.043	154.788
S100A4	ENSSSCG00000006578	38.9603	29.9895	107.2	140.225	181.175	143.105	227.031	159.849	171.306	351.238	177.465	330.499	176.767	243.016
POLR2F	ENSSSCG00000000116	75.8205	62.4059	62.4464	82.1648	55.6172	52.9689	124.918	68.9614	50.2255	102.022	66.8318	111.943	52.7731	118.917
-	ENSSSCG00000040857	102.3	96.3137	76.5084	96.9882	76.2049	72.4573	103.745	96.6378	73.9286	106.443	85.5869	107.62	81.0206	85.0833
CXCL14	ENSSSCG00000014310	70.1766	61.7478	247.023	309.631	253.944	252.302	119.23	75.8243	77.0686	105.118	93.0055	153.186	185.94	239.649
RAMP1	ENSSSCG00000016331	27.4052	18.9896	124.406	150.276	185.208	155.661	71.1431	64.3082	48.5758	103.691	51.4175	121.95	53.1779	136.742
-	ENSSSCG00000039612	82.6998	78.973	70.7136	98.7562	80.7478	70.4589	133.837	82.9461	72.5586	137.529	87.7894	128.03	107.875	184.759
DCTN2	ENSSSCG00000000444	117.153	113.249	97.3701	125.049	108.06	109.542	114.571	96.0974	101.378	163.295	101.685	128.377	106.264	108.626
CHMP4B	ENSSSCG00000007272	104.897	108.195	89.7525	94.777	86.7886	87.0241	91.0345	81.1683	79.942	105.456	76.0552	101.325	97.5699	111.507
MMP9	ENSSSCG00000007436	117.466	100.28	309.457	260.655	308.797	357.065	86.0564	166.557	197.996	107.21	93.9721	93.2871	110.475	125.582
VDAC3	ENSSSCG00000007026	85.4386	81.7749	65.2286	98.8942	79.7619	80.1917	105.719	60.7778	68.1049	106.322	96.5541	128.966	88.5605	98.934
-	ENSSSCG00000032573	82.9043	61.2829	44.0504	70.1503	58.0337	51.6439	129.893	50.4011	32.5148	68.7043	50.8195	121.014	82.8794	129.175
PKDCC	ENSSSCG00000008468	307.374	312.926	90.3825	90.0557	70.3911	58.1123	48.4178	49.2333	45.6151	46.1389	37.3253	36.5	54.1101	51.0039
CNN3	ENSSSCG00000006887	128.613	132.761	110.864	148.688	116.277	113.874	125.461	102.214	95.3735	120.89	107.461	123.609	142.922	117.539
-	ENSSSCG00000033653	82.2674	83.9863	84.5087	93.4059	75.6529	74.0752	115.345	87.7299	77.6737	121.721	81.5961	103.098	82.5863	122.678
PHB	ENSSSCG00000017549	74.295	68.3621	64.7789	89.9192	73.5506	64.1597	109.144	82.7323	65.6056	109.383	80.1208	119.017	98.2236	101.485
-	ENSSSCG00000046793	77.4532	68.6915	53.3824	78.7168	55.4616	66.4634	139.314	76.4767	91.6715	129.806	95.5527	163.12	112.459	169.057
NDUFS2	ENSSSCG00000006358	74.5238	73.9469	74.8226	94.8395	76.9874	72.8044	116.278	80.8974	78.2171	130.054	91.073	127.009	76.6068	92.2178
HNRNPC	ENSSSCG00000038947	77.1829	79.0719	76.315	101.218	77.3331	81.3604	139.638	79.826	85.1388	126.439	107.864	137.009	117.508	125.451
KDELR2	ENSSSCG00000031432	102.875	101.783	102.75	104.329	103.383	105.431	116.491	105.668	101.229	122.269	113.584	126.092	136.221	107.264
VDAC1	ENSSSCG00000014296	89.7938	84.7332	82.2068	107.009	96.0532	93.076	118.49	86.6548	87.5259	129.557	100.432	130.595	107.232	95.0602
IDH2	ENSSSCG00000001852	110.856	94.976	40.1523	50.8652	40.3439	38.4436	37.9254	44.82	34.6843	56.6937	38.5963	44.8019	35.7827	55.4829
-	ENSSSCG00000003520	92.7446	96.1172	81.8365	118.056	77.9033	85.2586	130.345	77.7857	80.6951	117.141	111.222	132.145	128.028	129.249
GSN	ENSSSCG00000037508	72.286	70.3922	38.6106	37.8495	37.566	35.3827	71.7753	91.0146	73.6596	95.6263	63.7278	65.016	59.2762	50.3406
-	ENSSSCG00000001341	78.7053	83.3993	86.2419	107.699	89.7044	90.5964	135.915	112.313	108.435	163.487	118.779	148.532	138.339	127.86
PSMA5	ENSSSCG00000006830	69.8631	70.447	56.7472	80.6795	58.0821	59.3791	119.767	59.5149	58.2654	99.3721	80.1828	112.932	83.7328	139.368
PDIA4	ENSSSCG00000015453	151.501	147.009	81.9425	69.7946	85.2441	76.9455	78.541	87.0874	77.4674	65.6658	86.298	72.1544	93.6203	66.1762
-	ENSSSCG00000039544	70.8591	57.6862	50.3979	83.9233	66.7227	65.526	202.346	62.0725	59.7263	134.789	113.787	176.255	131.483	141.307
LGMN	ENSSSCG00000002452	134.946	126.889	134.509	132.519	123.934	131.19	100.111	117.28	104.022	91.5673	107.045	87.2224	105.93	86.1265
HSPB6	ENSSSCG00000023498	36.8686	31.9997	57.8895	61.5325	67.2274	61.0705	32.7945	44.8674	40.5891	38.0311	20.3863	26.6981	19.405	12.9496
MMP14	ENSSSCG00000002039	165.414	150.615	187.663	99.7582	188.013	173.382	69.174	147.572	167.993	76.054	92.1034	66.1787	84.7619	83.6716
ERRFI1	ENSSSCG00000035774	37.6789	35.5455	230.001	133.873	335.511	341.202	108.05	174.304	286.993	204.406	121.328	163.786	127.864	184.683
YWHAB	ENSSSCG00000007381	106.691	110.853	99.4789	111.125	97.3641	95.9266	100.288	93.0772	97.8674	109.684	105.582	103.872	117.994	95.2583
HNRNPA2B1	ENSSSCG00000036350	104.649	103.356	66.5504	68.1102	68.2798	67.8243	76.9194	67.6263	73.7442	97.3264	93.9962	112.04	86.493	114.473
CFD	ENSSSCG00000013418	17.8899	14.3714	84.1931	158.181	125.46	153.607	261.12	187.392	190.916	223.247	159.314	177.941	139.642	213.058
DRAP1	ENSSSCG00000012965	98.9674	94.0243	78.5879	97.012	82.7084	74.5754	106.079	76.2982	64.0015	105.268	67.9134	125.493	87.8617	93.8105
-	ENSSSCG00000018085	46.4418	29.9162	27.7796	12.5339	20.6306	23.7976	15.7508	25.1093	31.4364	2.77976	31.0563	0	84.0805	42.2894
-	ENSSSCG00000022236	125.506	125.043	84.0899	122.763	82.1797	91.4037	125.171	114.541	93.0558	138.99	89.1759	132.806	97.9182	116.016
PTTG1IP	ENSSSCG00000031249	122.61	109.92	139.267	134.087	128.9	126.39	103.146	136.859	115.337	105.933	91.9548	97.9347	97.5319	136.816
TUBB4B	ENSSSCG00000037046	94.9627	100.051	58.7232	67.0344	46.4585	41.8508	54.0435	63.4325	47.8217	77.7523	48.394	56.3934	58.023	53.2833
MORF4L2	ENSSSCG00000012534	84.5288	82.6993	73.6159	91.7581	74.2053	77.5987	115.258	73.3286	76.1383	108.682	99.9102	138.777	100.907	118.37
GNG10	ENSSSCG00000046439	63.7409	64.8487	64.7588	109.635	76.3334	82.0555	150.247	72.7027	72.6326	129.227	112.932	181.754	150.289	164.819
UBE2D2	ENSSSCG00000036711	102.083	95.131	80.7163	103.245	84.1615	80.0627	99.1758	81.6218	70.7522	93.4885	78.8379	117.809	82.3738	90.2363
TGM2	ENSSSCG00000023522	72.7151	67.7672	379.462	271.956	372.681	339.156	59.1047	127.723	127.09	92.5422	78.3765	73.7676	92.4919	95.1065
PLOD1	ENSSSCG00000003433	181.455	158.827	164.393	100.331	180.606	144.472	65.5786	125.985	126.287	64.5089	83.9287	64.5583	78.3178	100.279
TSPO	ENSSSCG00000000033	90.0851	78.8686	104.871	158.966	117.297	113.685	161.091	105.101	93.3851	157.734	73.5897	149.108	91.2742	222.659
PLIN2	ENSSSCG00000035863	77.1532	74.1105	114.728	140.093	105.713	119.353	94.4905	78.4961	68.0038	103.107	99.557	112.427	87.9677	98.8126
-	ENSSSCG00000034253	82.848	81.337	69.978	94.0043	58.7482	74.717	130.819	61.2805	82.2322	81.4721	85.893	125.356	97.2042	86.8442
EIF3I	ENSSSCG00000003612	92.0402	90.9437	65.4912	89.6513	62.8473	64.6692	110.807	69.014	64.0561	130.243	77.2638	119.916	91.7978	105.303
NDUFA8	ENSSSCG00000005528	59.4361	55.0207	50.5064	65.8804	52.319	51.3794	88.7325	49.1705	44.6336	76.2476	54.9472	89.6203	30.0277	83.6756
EIF4EBP1	ENSSSCG00000022301	88.3903	86.2973	68.3381	100.391	83.1588	78.8494	102.407	88.7288	76.8704	119.254	67.1424	112.142	79.863	96.1939
NARS1	ENSSSCG00000004542	76.7739	82.5066	79.1174	81.3188	83.2205	90.2276	99.1134	90.5907	98.7046	113.201	128.233	120.267	110.452	108.255
SDHD	ENSSSCG00000015034	71.5936	71.3226	63.4724	82.0601	63.0532	73.7676	88.4599	63.4103	67.3523	115.194	85.8136	120.184	70.2045	93.2169
MAP1LC3A	ENSSSCG00000007281	93.6456	87.5599	78.7546	98.8548	74.4647	65.601	65.2254	60.8752	46.4771	76.8036	37.0964	62.6236	57.7076	67.3852
PRKAR1A	ENSSSCG00000017259	99.2345	100.316	104.788	128.953	105.074	108.539	108.725	87.2015	87.764	95.1921	103.31	101.121	112.156	90.4303
-	ENSSSCG00000031657	108.019	92.9328	284.349	225.105	96.2684	92.0279	101.219	153.848	70.7665	51.5898	96.4782	53.6361	143.307	94.4224
COX6A2	ENSSSCG00000036789	24.4946	17.4133	13.0677	18.6241	16.1746	15.0278	26.8306	15.534	15.3882	26.3851	16.6362	33.9744	19.3765	26.042
PRKCSH	ENSSSCG00000013627	112.612	105.284	111.113	87.9602	130.873	115.933	81.9802	121.303	120.385	144.812	86.9269	111.002	84.5574	106.436
DNAJA1	ENSSSCG00000011000	76.1886	76.4126	65.585	87.7374	62.3883	69.9647	109.113	60.179	64.9519	102.475	87.4342	117.135	105.24	119.215
-	ENSSSCG00000005656	85.9749	87.9336	67.8284	78.6549	73.2043	77.411	89.8846	74.9703	80.2561	88.132	98.6812	94.2055	88.4771	107.603
C1QC	ENSSSCG00000038706	115.645	111.514	76.4223	95.6357	83.3975	93.1966	81.494	99.3684	92.8563	101.393	79.133	104.347	73.8015	142.489
WDR1	ENSSSCG00000036501	101.056	100.117	92.8836	100.927	92.6025	86.0218	80.1311	100.862	88.6473	125.635	74.9774	90.1277	79.3666	83.7569
GNAI2	ENSSSCG00000011399	133.157	129.484	127.888	128.552	121.879	116.049	78.7793	107.604	105.16	101.398	85.6833	91.307	86.8415	112.388
POLR2E	ENSSSCG00000021472	74.7431	67.0676	61.5932	75.9903	65.1033	58.1226	110.68	74.8904	60.7298	107.9	64.5039	112.248	82.5181	107.72
RHOA	ENSSSCG00000022080	93.8329	89.3526	88.9488	112.258	104.458	105.978	119.408	98.1447	97.7916	123.423	100.062	122.781	110.96	127.639
TMED9	ENSSSCG00000014036	95.6677	92.3734	85.0186	89.1399	83.6272	75.6687	112.852	86.0896	72.8709	96.7677	74.9234	106.031	82.8902	85.5308
ARHGDIB	ENSSSCG00000033337	194.42	215.028	68.2871	102.456	66.5147	59.4122	73.9652	78.5315	54.6533	92.5918	71.3131	65.7779	49.1409	80.1979
PHLDA2	ENSSSCG00000021597	45.0534	43.5632	62.8212	75.9313	49.0686	45.7046	73.6558	46.8568	38.2334	71.586	42.4939	73.7581	67.2303	38.189
DPT	ENSSSCG00000035937	144.273	147.915	45.1913	54.4878	50.5218	40.068	56.4424	37.2906	37.1195	38.3376	39.2979	44.6337	43.201	53.686
IGFBP7	ENSSSCG00000008913	162.372	169.62	161.098	172.224	124.228	93.4637	91.2982	84.3532	62.3397	83.6327	69.2424	83.1804	87.7631	89.1816
-	ENSSSCG00000000394	66.4448	67.2435	72.8131	97.4532	88.4745	80.6928	193.317	80.5237	81.5875	158.409	105.368	185.736	127.458	214.923
ATP5PB	ENSSSCG00000037772	56.05	55.2101	38.7498	57.1756	45.7154	47.382	74.7292	42.0382	45.4725	81.4815	63.0481	90.1886	61.9397	82.1542
RPL22	ENSSSCG00000003369	70.8566	56.1519	53.0722	71.4328	65.8947	59.3099	216.01	59.4556	56.1176	109.645	94.7858	146.576	103.23	123.29
EIF3L	ENSSSCG00000000119	88.4898	87.4081	79.6101	117.187	82.6465	81.2972	93.8298	93.2076	86.0184	141.859	95.0538	128.087	96.4729	118.086
CAPZA1	ENSSSCG00000006775	73.0906	74.2627	78.9374	107.389	80.8157	95.5595	121.71	85.4226	95.1698	123.632	138.264	152.925	134.477	143.804
SRXN1	ENSSSCG00000023298	66.9653	67.4592	85.6977	100.226	72.8131	69.4286	110.985	91.2722	70.633	86.5779	87.153	90.1612	93.2671	79.7457
C12orf57	ENSSSCG00000040186	74.0075	63.1701	73.1085	117.743	91.8302	85.352	177.518	91.8872	69.8711	152.114	90.4307	154.799	106.711	120.134
APP	ENSSSCG00000012022	156.286	147.034	120.884	76.8484	114.094	108.079	73.3392	98.845	116.998	56.9158	99.9937	65.755	92.2473	79.979
-	ENSSSCG00000017181	189.808	185.825	123.267	125.004	96.1274	79.4204	93.0358	96.401	76.8216	93.9301	71.7187	69.7853	90.4448	86.0101
-	ENSSSCG00000017114	62.2542	65.8227	55.8569	69.3406	49.8743	40.8103	69.5295	53.7839	43.5175	69.1437	44.3598	57.8847	65.2282	119.436
MT1A	ENSSSCG00000023684	3.75914	0.806694	0.262664	0.871663	1.46302	0.562534	2.23393	2.88064	1.63576	6.36278	2.61449	3.25371	1.94335	0
DARS1	ENSSSCG00000015689	79.2089	79.6585	78.1019	105.278	91.213	101.569	116.087	79.1503	91.6179	136.052	124.684	148.424	146.209	156.079
COL6A3	ENSSSCG00000027331	227.815	186.659	241.575	61.985	226.384	167.289	30.7197	111.611	133.107	31.8979	54.2952	38.4693	50.1667	42.1463
PTGES3	ENSSSCG00000000406	77.1926	73.9792	60.6321	79.2517	69.8196	76.7682	89.2021	64.9772	74.9262	98.8039	95.4462	102.421	81.4736	74.6628
-	ENSSSCG00000034019	54.2259	38.8547	33.6304	55.8551	45.4092	39.1336	117.564	40.5132	28.9639	63.3807	47.1421	92.4334	72.5029	75.8109
CALM1	ENSSSCG00000025768	118.787	119.664	66.4443	85.3891	60.74	58.1758	72.9319	54.9491	49.5572	62.5027	72.3368	80.8854	90.2317	85.6558
H1-0	ENSSSCG00000039348	104.517	107.064	122.487	125.42	110.817	105.699	91.2361	96.4435	86.1656	76.3591	84.952	80.4386	97.1595	97.1688
CAVIN1	ENSSSCG00000035446	114.898	112.629	117.31	98.4055	124.814	114.818	73.0223	113.586	122.925	115.342	87.4571	91.8275	90.0092	88.36
MRPS26	ENSSSCG00000007165	68.2117	67.1472	71.195	83.0461	71.6212	62.4197	90.1483	72.6016	57.6091	103.163	59.5605	102.729	86.4577	149.432
PFKL	ENSSSCG00000028197	112.169	108.835	121.301	123.366	123.043	106.112	69.7587	121.997	104.407	131.085	67.1195	94.3711	65.6865	98.8328
SELENOS	ENSSSCG00000004826	53.0622	49.5844	56.1	75.4326	50.1584	52.5501	123.819	56.9371	49.8315	82.7559	73.6676	87.7168	91.5592	108.331
-	ENSSSCG00000040118	61.5144	58.2378	65.535	86.0513	66.7537	62.8326	60.6438	60.5219	56.006	86.8348	49.3238	72.9981	80.7451	54.184
RAB5C	ENSSSCG00000032467	108.077	118.793	105.202	120.562	97.2796	88.2029	84.2723	90.2396	86.8773	113.91	76.464	101.829	83.313	97.1565
BMP1	ENSSSCG00000009620	206.971	194.625	124.278	70.6695	114.744	90.7474	68.456	111.981	110.71	68.5813	64.3378	52.2395	46.8211	57.3448
NDUFB8	ENSSSCG00000006166	53.0501	46.0674	43.4225	62.4644	44.7246	37.8662	93.1549	41.8276	34.4599	70.1687	47.5617	88.8648	54.3484	68.7139
ARHGDIA	ENSSSCG00000034058	113.335	112.137	96.7809	100.097	93.6613	80.9778	69.3665	96.1325	69.7354	85.6416	55.5874	62.2709	62.4475	72.2402
PSMB7	ENSSSCG00000005590	69.2809	68.7189	62.8378	91.9395	64.6518	58.9379	84.4098	63.5932	60.6014	119.739	79.4809	127.956	88.8412	130.678
SDF4	ENSSSCG00000003332	92.9817	90.8506	118.481	108.913	114.672	100.548	102.056	103.009	92.2521	126.725	84.0611	106.77	92.2315	89.3718
-	ENSSSCG00000000261	262.956	241.6	106.578	103.98	85.785	66.536	75.0849	49.7075	33.6017	60.3785	42.6196	58.0156	36.2511	67.3537
IER3	ENSSSCG00000027607	84.4953	75.6466	106.407	90.1356	108.742	95.0162	69.1656	67.175	42.3746	35.1063	65.6343	45.1698	78.5509	75.9664
NDUFA10	ENSSSCG00000016349	61.3516	65.0454	49.6583	60.506	48.4189	41.4543	61.097	59.3326	49.3718	88.7979	49.7531	65.7214	48.931	57.5653
MSN	ENSSSCG00000012365	108.254	111.318	114.847	90.7476	115.168	113.174	79.5621	120.084	123.105	83.2608	107.401	74.1169	87.1564	72.464
CTSL	ENSSSCG00000010948	48.9454	47.314	120.312	132.552	116.158	135.346	144.257	94.8211	97.7606	146.446	115.053	154.045	122.946	142.097
-	ENSSSCG00000018090	55.2907	22.2805	23.4709	6.98318	15.1067	10.0533	8.8719	8.9102	18.1246	4.11007	36.2519	5.05639	88.4047	139.348
-	ENSSSCG00000032942	92.4733	93.8936	108.78	120.705	112.572	105.575	98.2867	104.933	106.109	139.59	98.9413	93.7311	92.2022	103.54
HM13	ENSSSCG00000007228	87.3022	82.3782	86.7812	88.1565	88.7199	82.7554	92.4418	103.601	90.8513	104.744	81.7024	92.7454	75.4619	101.573
VPS25	ENSSSCG00000034782	69.9763	74.8474	78.7036	95.5186	77.9943	70.5216	117.978	71.4966	78.2976	125.8	83.8477	120.518	63.3533	139.881
CKS2	ENSSSCG00000021161	81.9959	79.8983	34.9676	51.6656	38.5078	35.5352	60.7426	35.0304	31.9599	57.406	50.7438	88.4869	62.2568	109.334
EIF2S2	ENSSSCG00000026617	66.3393	66.1887	48.473	66.5492	50.9025	54.4653	98.9098	53.7282	54.9891	100.16	88.9106	119.533	84.9121	125.917
CCT8	ENSSSCG00000026761	56.3554	63.7931	56.7985	73.5638	64.483	60.7936	83.4692	62.2979	64.8387	99.5044	92.7789	110.491	92.3215	105.011
MYBPC3	ENSSSCG00000013236	3.37205	2.59528	0.0885276	0.098772	0.0328728	0.0284393	0.0836577	0.0770173	0.0496181	0.009689	0.239286	0.071519	0.212125	2.99857
P4HA1	ENSSSCG00000010292	82.8366	79.8804	104.475	104.92	133.74	141.897	150.709	96.2331	123.885	106.11	137.182	149.373	155.206	158.794
-	ENSSSCG00000010203	73.6988	75.7836	80.616	90.6061	78.6185	83.4494	103.386	83.1284	79.667	92.7219	96.8905	99.9782	110.099	81.7963
-	ENSSSCG00000026414	77.381	60.063	52.7117	95.5907	73.7177	57.8378	169.005	60.2599	37.8571	95.3023	73.1331	102.451	98.7646	70.0833
HNRNPD	ENSSSCG00000009249	90.69	87.8639	78.7904	74.17	63.7594	57.6275	58.0987	81.9018	62.2119	70.8618	69.7148	62.2963	61.7945	79.8893
CALD1	ENSSSCG00000016535	98.2791	102.642	130.035	115.317	142.025	141.072	98.3564	105.756	123.342	94.5773	128.245	105.903	146.558	115.368
NAP1L1	ENSSSCG00000000522	87.5585	82.7144	59.4714	86.7525	65.0813	70.0325	104.066	72.4669	75.2236	113.98	96.9258	121.727	116.655	111.978
AARS1	ENSSSCG00000002723	108.955	112.504	85.6655	90.9681	83.927	84.8244	63.4712	90.3131	94.0578	101.733	75.1997	80.9009	58.8724	84.1066
GHITM	ENSSSCG00000010345	61.7516	58.8651	43.3222	58.7537	45.7904	45.547	72.3256	47.83	46.1263	81.4571	59.4558	88.9818	66.8863	102.056
EEF1D	ENSSSCG00000006954	76.2009	71.6953	69.7876	96.888	80.4172	74.1466	95.8746	78.5522	66.3357	116.776	66.6072	104.199	81.056	110.09
SERBP1	ENSSSCG00000003798	67.4687	68.8032	62.1097	73.5695	63.3293	64.119	88.823	69.5669	71.5906	96.5337	88.8108	115.23	93.1575	99.1388
PSMD3	ENSSSCG00000017489	71.6819	71.8402	81.7663	89.4531	72.0134	70.4424	70.1187	85.7706	74.3146	98.2922	65.3735	69.982	82.9144	73.5083
-	ENSSSCG00000041063	75.8892	82.0741	61.4768	107.091	65.5933	76.5824	89.0452	55.5432	59.9856	118.467	75.7419	86.7518	74.2122	54.3543
TAX1BP3	ENSSSCG00000017866	97.6185	95.0019	70.4874	92.6843	70.3435	63.3464	87.7238	64.0039	57.7768	87.455	68.387	82.7152	76.7848	73.9493
ATP5F1C	ENSSSCG00000034086	52.1196	50.1023	36.4453	53.849	38.947	37.2178	73.5773	38.3193	35.6105	67.9162	46.7423	80.2995	47.5352	69.3518
PRDX2	ENSSSCG00000013736	79.1432	83.2472	68.5678	97.645	77.2277	70.7154	106.208	64.1652	58.1575	103.461	66.3422	102.206	62.8159	79.6387
CAPN2	ENSSSCG00000029411	121.117	124.019	90.794	99.1579	78.6728	75.015	69.383	84.2752	75.794	91.1221	76.8423	75.2826	72.1641	65.4058
ITGA5	ENSSSCG00000000293	159.14	140.612	122.804	57.7228	140.223	110.044	60.0725	121.621	114.338	45.1683	65.274	44.1428	63.3451	45.3035
FSTL3	ENSSSCG00000037102	97.8461	88.3097	72.6086	73.1961	85.1042	73.2003	72.4595	77.3683	68.9919	77.0328	59.7747	65.8416	72.5556	76.855
SRSF3	ENSSSCG00000001564	62.7348	68.8667	42.8198	55.2709	31.9188	31.3528	72.1859	49.4306	33.0724	53.5063	65.5897	64.0027	63.818	48.1876
SEC61B	ENSSSCG00000038914	75.215	77.0978	54.0356	89.3798	60.6352	57.1789	145.862	58.3157	45.7669	103.916	69.793	125.385	77.5566	101.655
ST13	ENSSSCG00000000071	71.1329	71.4992	78.5708	112.286	97.2625	104.868	126.675	89.286	101.719	135.538	116.976	138.369	107.351	102.298
CSDE1	ENSSSCG00000006752	70.6302	72.9542	69.1457	83.0766	80.8174	87.1441	89.0512	72.9136	83.957	93.9454	104.057	104.152	113.972	96.0468
-	ENSSSCG00000027840	88.4762	85.1043	63.0256	87.792	63.9509	56.2411	87.0366	67.0962	46.939	93.8323	49.6316	95.16	54.2895	113.099
CDK2AP1	ENSSSCG00000009775	71.1773	93.676	61.2351	84.5685	67.0213	67.7783	78.1548	68.6497	60.8818	95.6852	67.9332	104.666	91.0072	108.212
-	ENSSSCG00000020830	57.3926	56.7676	48.5258	81.7566	56.9614	59.77	119.446	62.1688	63.3781	126.603	96.9776	157.769	109.611	125.231
-	ENSSSCG00000033734	92.2796	87.6113	59.0439	90.2891	60.4284	59.3988	119.892	45.4632	41.6225	86.4041	75.2581	120.816	108.398	117.508
FKBP4	ENSSSCG00000000743	56.7532	54.4884	44.056	51.0528	47.9291	44.3658	57.9533	52.977	53.8508	77.0045	50.6247	70.6153	58.2555	75.0941
FABP4	ENSSSCG00000040681	54.8644	48.084	26.2733	48.7493	25.6324	26.7915	120.479	35.765	35.0311	50.4178	62.8106	59.6931	84.425	78.2771
FKBP9	ENSSSCG00000021250	116.541	108.429	115.448	76.0867	116.788	108.236	92.7381	98.3594	104.541	84.6542	94.8442	84.3298	85.2156	88.8819
COX4I2	ENSSSCG00000038384	70.5088	62.2896	93.2785	136.814	112.725	110.538	200.495	94.6041	89.803	187.319	97.3671	179.998	85.2644	182.785
CKB	ENSSSCG00000021220	138.181	122.563	120.467	143.446	128.953	112.47	53.1791	80.2572	65.5294	84.3566	55.2481	72.1516	74.6187	89.917
PDLIM7	ENSSSCG00000040507	133.619	130.731	73.2609	83.3222	64.1823	55.1014	50.1625	62.1242	47.787	60.8562	41.0446	54.5244	59.4973	59.3085
-	ENSSSCG00000003903	52.4604	30.3657	22.4654	42.4344	44.1805	39.3164	120.088	36.0539	21.328	43.3077	49.2435	54.058	73.3463	60.9133
RPN1	ENSSSCG00000011612	88.9474	88.7124	82.4757	80.8877	95.4539	90.2718	90.6025	91.5165	96.1631	94.3894	78.6234	87.1396	79.274	82.3958
-	ENSSSCG00000034230	67.2528	62.6776	54.1623	83.0441	64.9794	61.1415	111.485	55.5888	48.1384	98.2253	64.7553	102.91	78.3358	98.4898
CKAP4	ENSSSCG00000000171	112.222	102.61	104.148	66.9402	93.7872	80.0209	91.6889	106.083	82.8434	56.3133	84.2182	52.5837	69.9295	64.2927
DSTN	ENSSSCG00000007085	54.8684	54.0616	47.6239	66.4231	58.9264	58.742	74.9022	46.906	49.3819	93.7205	72.9801	101.367	80.4707	89.8492
ACSL4	ENSSSCG00000012583	40.4133	41.5052	119.406	88.2776	146.106	156.233	132.328	130.893	157.518	104.798	167.524	125.706	150.278	142.784
-	ENSSSCG00000007524	49.5708	36.8298	29.7232	49.9982	36.5469	36.0662	97.4313	33.7873	27.2708	60.7601	47.3281	80.0417	53.463	98.9518
GADD45G	ENSSSCG00000035249	46.9001	40.2589	14.4093	15.0476	6.58532	7.85519	13.9975	15.6518	6.17476	7.54333	11.2057	8.46609	11.4877	10.3542
TFPI2	ENSSSCG00000015322	102.208	111.261	95.7868	125.543	107.477	126.995	99.1249	52.1095	61.3184	91.0295	74.5184	113.696	93.9242	115.433
UBE2S	ENSSSCG00000035344	87.6528	83.0153	64.0949	71.2658	44.6011	34.3561	63.4696	47.3254	36.3088	61.3177	39.1748	54.8149	52.7673	77.96
PSMD7	ENSSSCG00000032908	65.4828	63.666	61.074	73.6816	57.8422	55.5914	80.4326	56.1403	54.3055	86.1981	64.2571	84.9606	64.7484	74.0263
IL13RA1	ENSSSCG00000012633	76.1091	74.4263	91.8266	85.2401	106.221	110.701	118.369	107.523	119.711	85.8729	130.375	94.7463	123.586	98.1534
AURKAIP1	ENSSSCG00000038474	70.5288	73.9713	62.4303	85.3476	59.6878	52.5775	84.8199	65.963	57.6542	100.084	52.6743	81.6664	77.7239	99.4358
P4HA2	ENSSSCG00000020915	121.71	107.773	110.318	81.5523	132.522	117.043	101.072	106.646	118.423	90.64	87.0371	101.896	80.8042	86.2021
HMG20B	ENSSSCG00000040421	85.1015	84.5359	100.473	120.623	98.4004	87.9004	92.837	87.4763	78.3722	104.172	78.8086	88.121	99.7359	88.1964
PTX3	ENSSSCG00000011727	20.2459	20.0065	11.9573	9.7641	15.4109	13.0776	173.25	127.769	118.637	109.548	131.162	102.414	95.8361	74.004
CANX	ENSSSCG00000014020	90.3939	88.8648	77.3828	64.1383	91.9607	87.3175	83.128	78.0741	89.6198	58.8955	97.2863	81.9868	115.072	88.6563
SLC25A5	ENSSSCG00000012623	57.2388	58.9335	52.6526	76.9074	61.618	57.0568	87.9448	68.1133	64.4099	117.455	83.9833	124.142	71.2908	98.6865
PEA15	ENSSSCG00000032164	104.001	105.822	80.1264	76.8314	64.9932	63.5995	56.1538	59.6176	52.4278	59.6096	55.8468	55.377	53.1385	46.9543
TMED10	ENSSSCG00000035684	85.0195	86.9074	75.4493	78.8245	86.2204	89.7784	100.285	76.57	82.6327	74.1258	107.474	90.2908	106.623	105.197
LEPROT	ENSSSCG00000003806	68.9826	71.7348	91.2837	108.717	99.8179	107.893	138.63	90.7905	106.207	131.717	116.333	144.687	133.123	129.643
TUFM	ENSSSCG00000007803	63.1289	60.0064	61.6255	70.5728	66.5324	63.2811	69.5051	80.8213	65.7595	111.539	60.803	75.7657	80.4847	50.0575
-	ENSSSCG00000039582	60.1505	54.5288	41.4131	63.467	43.6068	43.4498	90.6004	42.1372	37.484	77.311	59.1849	108.285	73.6548	83.9044
PHC2	ENSSSCG00000025344	116.79	113.473	100.213	88.0803	86.5167	77.9332	76.0829	81.4505	76.746	72.726	61.805	65.7228	73.5777	65.584
CDC34	ENSSSCG00000039640	66.788	60.3297	51.453	62.8717	57.3725	54.6715	61.1781	60.1266	51.5433	70.7017	52.2609	68.2681	76.2698	59.7264
FKBP3	ENSSSCG00000021217	53.2069	47.5913	38.9685	56.417	49.3228	47.4896	87.9044	42.6838	41.2711	85.886	68.6452	112.453	64.6379	79.7346
MAP4K4	ENSSSCG00000008164	84.8265	82.4563	109.141	90.3489	117.302	108.135	72.1829	127.666	126.012	102.99	97.3737	81.8862	87.5151	82.5
HTRA3	ENSSSCG00000008723	309.701	276.962	137.44	119.657	105.599	86.955	37.9592	55.8606	47.5115	45.15	31.0066	31.6931	46.7688	26.1572
COX7C	ENSSSCG00000040325	41.2451	30.6307	24.4192	38.2834	33.244	32.2543	70.5579	25.66	24.2393	54.4247	45.1775	77.7133	48.2267	51.3622
AEBP1	ENSSSCG00000016754	103.039	83.9977	179.883	65.082	176.536	124.694	58.01	147.201	146.852	66.3978	61.812	46.7681	56.1704	59.9542
PDIA6	ENSSSCG00000008633	114.873	107.227	75.7901	62.8444	77.3731	69.418	69.7189	78.2745	65.7094	65.6455	64.5859	68.1079	64.125	70.2348
SHISA5	ENSSSCG00000011357	70.3975	66.8506	101.569	95.817	127.025	131.083	110.559	126.516	131.602	130.201	95.3337	100.056	109.641	95.2384
METRNL	ENSSSCG00000017137	65.4024	67.7623	78.5803	83.5594	86.4155	72.9044	75.1263	96.1137	71.7116	83.6744	73.2056	74.4818	73.6706	88.6353
FUS	ENSSSCG00000030798	82.5786	86.6384	72.5442	59.8367	37.9718	34.4754	44.8219	72.639	44.633	50.4533	46.0699	41.3573	33.6691	27.5129
CALU	ENSSSCG00000016581	114.466	114.415	93.3144	70.4043	93.2896	87.2888	95.3396	83.1331	90.1391	61.7975	94.6641	73.9038	88.1684	81.5349
-	ENSSSCG00000007188	80.4609	78.8597	67.368	80.5632	74.3002	71.0627	68.1369	59.978	56.3966	66.5875	60.904	60.2097	68.4133	74.7035
LAMB1	ENSSSCG00000015444	123.442	113.42	154.907	62.8965	181.075	154.951	69.2175	109.85	136.015	76.9351	89.5593	68.793	72.3829	59.7411
-	ENSSSCG00000013260	141.663	143.171	94.8889	120.526	83.116	70.1304	82.0629	49.5194	37.7226	51.386	56.3918	62.2807	73.657	102.274
HNRNPM	ENSSSCG00000013602	83.1547	84.8679	62.3524	60.6522	55.7192	56.1261	62.2067	66.5598	55.4714	68.6437	67.4173	64.4953	60.6544	61.7117
EMG1	ENSSSCG00000026812	64.0485	54.8442	39.4491	51.4855	45.7447	38.9242	87.5531	47.5972	38.7679	79.9884	62.1549	91.9388	54.7975	80.5762
DUSP1	ENSSSCG00000016991	35.0726	34.0854	85.8911	94.642	84.7086	88.8643	117.095	130.252	131.844	134.538	125.07	114.815	97.8709	126.598
CLDN5	ENSSSCG00000041667	132.678	104.769	112.547	137.674	90.6197	93.5244	58.9952	42.907	43.3144	24.3569	39.5732	36.1024	75.2035	80.5812
-	ENSSSCG00000039731	54.3996	49.6059	50.6865	72.5331	57.2271	52.5495	106.105	53.4766	47.8738	94.4067	75.0805	106.675	81.2843	91.4091
NDUFB3	ENSSSCG00000016100	38.3808	30.5645	27.6784	37.7642	32.3267	35.5665	84.8387	27.8778	31.4684	70.8906	59.3149	88.3913	63.1888	126.766
AP2S1	ENSSSCG00000003106	75.734	63.169	62.1974	82.3976	59.9446	55.9957	90.668	68.1452	65.4644	99.1553	71.0699	105.712	74.4286	88.6565
PGRMC1	ENSSSCG00000012625	85.5466	89.9082	71.7782	86.357	73.2727	75.9175	78.2878	65.0895	63.2077	70.768	73.3825	75.5241	73.4218	96.7963
SND1	ENSSSCG00000016590	100.905	98.8637	85.5209	77.4346	94.6227	85.4529	58.6512	108.669	100.935	112.312	69.3955	87.0436	62.9753	70.5226
ATP5MC2	ENSSSCG00000033368	59.6645	42.7009	47.6221	71.1792	66.1994	61.7692	91.2164	64.5501	40.9723	62.4911	53.0598	68.9547	88.2692	110.603
-	ENSSSCG00000016379	96.5139	90.2843	103.445	85.2236	112.595	100.782	43.0695	106.595	98.9679	103.702	59.1471	70.7183	49.6246	73.984
NSA2	ENSSSCG00000014075	58.3146	54.1506	45.6076	71.6766	55.7962	55.9161	102.5	53.2483	57.5416	110.575	91.9739	124.116	96.7908	93.2043
SELENOH	ENSSSCG00000032364	63.5512	52.3739	44.9556	52.9622	51.4163	41.3532	89.3668	51.3957	34.3341	79.156	46.7994	69.2159	64.3668	41.4704
PSMC1	ENSSSCG00000002433	62.9118	67.0599	55.8824	70.805	56.6527	50.7428	76.6201	56.0399	53.595	83.0726	60.5188	84.3465	43.8178	59.8147
PPP1R3C	ENSSSCG00000010464	54.2225	48.8647	10.1794	8.51976	98.4841	106.441	10.0067	12.1345	87.6107	88.3955	13.6211	90.7381	18.5224	92.6283
YWHAH	ENSSSCG00000010035	80.4424	74.2384	69.4562	82.2998	59.0888	63.9552	64.8368	63.667	53.0953	62.3788	64.0892	61.9671	65.5165	77.8784
TRIM28	ENSSSCG00000037920	95.7896	92.2993	82.2067	77.5905	82.0254	73.6524	48.3567	87.5043	70.8626	75.0386	53.0533	51.1545	52.6124	38.593
UBXN1	ENSSSCG00000023110	72.6141	69.1179	56.9904	70.8081	56.2101	55.1748	82.9962	60.7068	51.8073	102.327	47.0266	92.7126	45.7619	84.2618
-	ENSSSCG00000012178	61.2774	62.0531	53.1507	79.9249	60.7891	68.0378	98.2279	62.7031	68.5943	117.141	99.6196	131.948	109.931	129.35
-	ENSSSCG00000000377	54.5464	55.8337	55.3089	56.6035	55.9005	57.8204	70.439	67.0003	64.6859	81.6263	75.5047	77.6456	74.254	76.879
ANXA11	ENSSSCG00000010331	65.0152	61.295	81.0246	85.1661	90.8894	89.9156	72.0867	101.531	101.861	97.2522	83.9994	73.6263	82.4759	66.0644
-	ENSSSCG00000039183	43.9851	28.1569	34.284	45.8558	39.5145	34.1376	94.0385	49.5816	27.2844	55.3579	24.9866	91.3645	86.6977	0.677809
NDUFS3	ENSSSCG00000032081	51.2564	48.5396	42.3035	65.0357	47.1876	48.3994	77.1538	53.9916	44.5181	75.9874	53.5722	79.9994	67.2056	86.2629
OAF	ENSSSCG00000036307	153.466	148.865	75.0314	71.9675	72.1733	58.8258	60.4821	67.9597	47.9708	48.3635	38.5328	35.943	73.4645	54.0258
SPCS1	ENSSSCG00000011447	60.507	62.4649	55.9108	83.0675	57.243	59.9251	99.8174	54.6736	57.9186	111.167	68.4913	103.292	91.3321	86.4056
STUB1	ENSSSCG00000008008	70.3527	66.3829	68.5505	83.0956	78.4982	66.5377	94.1782	68.8273	61.7479	89.8851	50.9027	86.4009	50.2528	77.0939
ILF2	ENSSSCG00000028553	61.357	66.8577	44.2471	59.5838	43.0039	42.3066	74.2882	47.7942	43.5851	72.1762	59.7156	76.2463	68.5677	74.7794
PPA1	ENSSSCG00000010261	63.5506	59.5525	34.2284	48.8713	37.2825	36.7641	79.7855	38.1463	43.679	77.1841	54.207	88.1635	59.9785	69.9629
-	ENSSSCG00000020808	54.3927	56.7317	45.4747	53.8852	49.8801	50.196	78.3675	54.1004	56.25	73.0164	76.197	86.3503	76.9452	78.4294
PPP4C	ENSSSCG00000036817	71.6538	76.6765	69.6979	82.5193	62.0005	57.5481	66.2608	68.335	55.0826	76.5742	59.8917	68.1238	57.1024	67.8475
-	ENSSSCG00000011290	51.1092	48.633	31.284	47.8385	34.7411	37.2184	84.1891	36.0646	37.6415	72.5197	66.2368	97.8387	68.1514	74.0575
AUP1	ENSSSCG00000008268	71.1554	70.0766	60.3336	75.5422	63.6774	63.6406	83.6902	75.1436	68.6061	88.6505	56.5006	76.8708	66.1328	111.912
GPNMB	ENSSSCG00000032241	88.7385	83.0518	130.357	177.448	162.742	191.611	77.4631	91.6736	97.1543	68.7996	92.7405	84.8453	118.568	118.973
RPL26L1	ENSSSCG00000016989	54.3761	57.5643	47.0533	74.064	58.6516	60.5467	99.3542	54.663	51.14	87.5253	70.9672	113.566	97.7021	126.319
PYCR1	ENSSSCG00000034723	102.085	94.605	83.3031	81.6632	80.7183	71.6922	76.9015	81.6942	64.285	88.5068	53.0717	75.3849	59.3313	95.3485
ATP1A1	ENSSSCG00000006740	83.5554	79.4353	76.0428	45.0991	87.6307	70.8838	32.8938	83.1382	82.5235	53.5769	55.0117	45.7641	44.0075	50.7094
BHLHE40	ENSSSCG00000036136	75.0018	73.0613	97.704	91.3098	159.034	162.987	48.5811	72.706	135.4	94.3469	66.979	74.1981	50.6843	85.452
SRSF2	ENSSSCG00000036592	63.9456	73.5415	42.6538	45.6042	34.1018	32.149	48.2694	51.5097	34.8401	40.7275	52.1624	55.0207	61.1678	44.5711
FAM167B	ENSSSCG00000003616	125.231	115.309	83.5893	105.104	71.9901	70.5877	62.8849	40.7166	40.8798	30.7785	40.584	47.8882	28.0058	68.2035
-	ENSSSCG00000039825	3.25674	1.26051	0.163576	0.0449244	0.121481	0.0560518	0	0	0	0	0.0336868	0.475736	0	0.149409
NPM3	ENSSSCG00000010568	44.0299	49.3345	25.8248	33.57	25.3643	24.3816	72.5897	35.4848	33.5383	72.346	36.1549	63.4124	33.6112	44.5129
PSMC6	ENSSSCG00000005038	53.8319	53.2709	48.6431	68.0824	51.3018	59.6081	83.7449	48.2352	55.0076	84.4953	81.6659	115.001	102.242	75.4547
C19orf53	ENSSSCG00000013757	56.5228	51.6648	54.5953	70.6492	57.0922	53.9089	87.9154	55.9578	52.4505	77.3865	59.4274	101.128	79.9623	113.577
TAF10	ENSSSCG00000029630	52.9715	48.4101	60.4745	91.5605	76.5803	62.433	96.7783	67.2948	54.4635	108.244	60.8189	102.267	86.7549	107.942
PLAC9	ENSSSCG00000010332	13.0823	13.8576	49.1568	61.9856	67.8347	69.0837	173.778	132.177	129.221	161.543	116.775	166.757	121.801	144.423
NIFK	ENSSSCG00000015730	48.2805	47.9865	40.1613	56.3206	40.2664	46.5646	76.0652	48.8349	46.613	76.3031	73.0458	82.9186	78.8688	90.2271
UBE2D3	ENSSSCG00000035622	55.2362	56.37	48.8888	65.0344	51.0914	55.089	80.1855	50.7653	51.4925	72.6146	71.9886	88.2066	80.2704	62.4247
S100A10	ENSSSCG00000006612	52.4712	49.2899	42.777	57.3298	56.4837	56.0413	106.526	70.3268	64.7426	133.606	85.2366	135.906	88.5106	96.0473
CTTN	ENSSSCG00000031769	86.0205	81.1817	99.6135	74.7495	94.6009	86.0901	59.2947	91.9705	82.0062	79.7619	61.1573	59.6949	63.1938	57.8968
MRPS21	ENSSSCG00000040782	49.8102	33.6212	48.5736	66.9941	66.2008	55.329	172.307	60.0478	48.4259	94.4996	72.0012	121.777	83.364	186.893
MYL12A	ENSSSCG00000003691	61.6543	62.9135	64.6906	85.265	67.7991	66.644	90.5619	52.1925	52.8444	86.7675	70.39	100.132	66.0943	102.955
ZYX	ENSSSCG00000016461	89.9269	92.8309	113.793	97.5084	109.452	91.3486	48.0393	112.56	89.282	84.1072	50.9909	41.0553	44.4678	24.4611
EMILIN1	ENSSSCG00000008557	182.212	155.899	136.897	50.0709	118.366	80.3681	49.9018	86.1076	69.0515	29.3732	39.6503	27.276	40.8371	20.6832
NIBAN2	ENSSSCG00000005614	98.0763	94.7741	129.776	105.166	111.89	98.6393	57.0438	100.464	90.1259	80.6707	55.761	60.6563	65.9758	66.2149
MTCH1	ENSSSCG00000001571	79.3068	78.9171	78.0979	102.384	78.3058	74.6034	69.7581	75.9933	61.1385	96.208	64.0954	96.1833	73.7158	96.7261
HK1	ENSSSCG00000010253	86.8381	82.6317	85.9319	86.0406	104.471	99.8458	45.4479	89.7444	95.9566	91.2628	63.0597	68.6914	57.9127	54.472
APEX1	ENSSSCG00000040060	49.4511	49.556	43.8508	63.0093	50.0027	49.5531	76.8237	52.6894	49.5763	79.87	67.2625	82.3568	71.091	52.0228
MMP19	ENSSSCG00000000368	100.252	92.6177	96.6406	73.6955	105.945	99.5678	71.9979	93.974	102.518	73.2346	76.2271	67.136	59.6484	77.6151
ANGPTL2	ENSSSCG00000005608	76.8868	68.8386	155.959	74.9774	168.356	129.116	72.1908	114.862	107.624	54.1102	77.845	54.0982	84.4876	69.3577
GNB1	ENSSSCG00000021890	93.9949	88.5382	86.8508	91.3479	87.3365	82.1384	59.8631	73.2846	70.0481	71.4584	63.2812	67.764	71.7296	79.1889
NOP56	ENSSSCG00000027676	44.9367	49.0415	45.9439	49.4478	37.6132	34.8527	84.6767	63.051	46.3336	62.302	61.8648	64.2969	73.9794	63.4598
RASSF1	ENSSSCG00000011407	91.9735	78.6369	66.4371	69.9048	63.7234	63.5251	52.1947	51.8282	47.9649	53.0698	47.7447	47.335	55.4674	52.3331
FLOT1	ENSSSCG00000022725	75.4946	70.8011	74.66	90.5949	87.4316	81.1092	71.3872	72.4534	66.8209	86.3778	55.1906	82.6795	69.249	65.8036
-	ENSSSCG00000016186	74.6245	70.2315	130.132	112.249	118.815	119.134	80.3756	87.0272	86.4778	79.9066	70.4795	74.6868	68.1586	93.4231
CDC37	ENSSSCG00000013647	63.5951	62.8403	65.6369	70.1593	66.8082	62.0134	60.1678	66.7309	61.8197	93.5139	60.3079	81.7425	57.8172	56.3146
CDK4	ENSSSCG00000025092	65.5337	65.4913	50.1796	73.7538	55.054	52.6243	86.5767	55.6082	58.5793	87.2648	63.5936	78.8919	84.6102	77.1428
ENG	ENSSSCG00000005625	177.075	154.236	109.241	67.5165	105.148	83.6338	37.1171	69.2812	64.5372	44.2423	32.0938	32.1405	24.1154	30.2576
PTP4A3	ENSSSCG00000036569	13.1677	11.6689	5.93189	5.32339	7.01932	5.69309	4.34956	6.36951	5.53659	5.02137	2.17964	3.61901	0.645652	1.9859
SERINC1	ENSSSCG00000004237	63.6372	62.9829	64.8654	75.0582	76.8668	83.8647	89.3971	59.4985	69.1419	69.0634	96.8479	90.6514	101.436	103.146
MGST3	ENSSSCG00000006325	41.5238	38.5505	35.2063	44.2324	39.9002	34.4534	69.8315	34.1094	31.3801	60.7413	37.3847	63.5012	33.7931	45.5002
-	ENSSSCG00000035728	60.3726	55.7129	51.3746	72.1986	55.1369	52.252	75.8593	52.3878	41.0445	79.8836	40.1116	67.4641	83.7744	71.4861
EIF4A3	ENSSSCG00000017155	53.2017	54.7773	55.4851	70.4415	55.6626	56.8645	84.9252	60.7941	54.2755	83.2409	56.796	89.5441	51.1601	66.4872
FSCN1	ENSSSCG00000007586	132.556	127.826	81.2373	82.737	78.2504	69.6657	49.5884	74.5251	60.1361	52.745	45.2472	39.1917	45.8059	30.9092
CMPK1	ENSSSCG00000003885	60.9417	62.4746	55.9201	73.4669	62.8045	63.9669	88.0992	54.2027	58.4519	101.029	68.9893	106.7	88.4269	72.9491
UBA1	ENSSSCG00000012270	87.6604	84.3668	88.2298	74.4386	94.2339	84.4166	42.0509	93.3037	86.4882	79.8214	59.988	53.1456	47.2338	48.8123
MYDGF	ENSSSCG00000034898	56.6936	51.5397	55.0168	68.2988	63.9018	58.5454	108.099	62.2229	52.45	88.8944	61.6124	97.322	77.0032	95.4263
ACKR3	ENSSSCG00000016322	54.604	39.6818	78.6547	77.1592	204.437	232.367	33.1644	46.7905	101.574	50.4919	35.0027	66.7776	35.5972	134.792
PTDSS1	ENSSSCG00000006089	36.1022	35.7055	29.1969	31.4683	28.6484	27.593	30.819	34.6642	35.6621	46.6132	33.385	44.7406	30.099	42.9611
SPCS2	ENSSSCG00000014850	55.7677	57.8315	40.0998	62.1521	47.167	48.0366	76.4625	40.9561	44.1723	64.0473	67.4496	76.1343	73.2604	79.6118
RANBP1	ENSSSCG00000038308	47.8027	49.2808	32.4974	43.7677	31.3635	32.064	58.1226	42.0633	36.4043	57.9823	39.472	60.7543	51.1464	73.5679
IER5L	ENSSSCG00000005673	82.6496	92.2729	83.7748	82.2771	99.3306	85.8566	54.4429	80.6517	68.7851	76.9904	51.4133	59.4293	51.2867	92.9319
EFEMP2	ENSSSCG00000012971	66.0916	60.4261	94.7752	89.1416	95.9923	86.55	89.1178	97.396	85.5667	127.763	72.0692	96.0505	81.1752	115.197
SSR3	ENSSSCG00000030567	61.9388	57.7681	47.417	71.363	54.9124	57.4071	83.9168	56.3249	52.6063	85.0343	70.245	92.415	78.7852	91.329
DUT	ENSSSCG00000032141	67.645	66.7975	23.4306	38.6355	21.5589	22.6516	58.8665	28.0421	24.9638	57.3845	38.951	69.71	49.2719	49.2774
U2AF2	ENSSSCG00000034815	74.4129	70.9858	75.4359	64.9414	66.5493	61.5873	46.4723	74.5186	70.5649	61.7335	54.8013	51.492	36.7131	61.5856
BTG1	ENSSSCG00000035790	56.8881	61.989	77.6419	104.771	83.044	95.8853	77.114	76.234	79.8979	89.6971	78.1514	88.2814	88.3057	103.618
AWN	ENSSSCG00000002980	69.8385	79.3002	72.9466	82.8913	51.622	44.0662	79.7244	42.1561	24.0258	51.057	47.2595	87.7704	92.1628	133.156
FKBP2	ENSSSCG00000033757	61.7126	54.5086	58.9098	66.7007	73.649	62.1311	84.9025	61.9968	54.4214	77.5854	52.2259	91.9945	46.4423	94.4114
CLIC4	ENSSSCG00000038994	72.1004	80.5248	75.8524	84.3249	85.0697	83.471	91.5657	62.6443	70.3705	62.4196	94.0384	83.5145	111.621	91.1565
C1QTNF1	ENSSSCG00000035511	17.4104	12.6264	70.4204	42.8578	75.672	62.2222	148.144	181.541	159.26	132.306	106.358	95.3161	88.617	88.8383
SMIM26	ENSSSCG00000025589	51.3272	34.8284	33.8734	46.9325	40.3706	40.6599	144.908	39.2709	36.3792	64.6449	53.4678	113.722	44.6116	76.2685
HNRNPDL	ENSSSCG00000037245	64.1024	66.8688	45.9204	50.0832	44.9716	45.3188	55.1596	47.1676	46.8402	53.3813	59.8052	64.6929	64.4386	60.6732
VMP1	ENSSSCG00000017668	77.4978	68.4962	46.6977	59.5446	64.1194	67.5728	86.8677	51.7976	62.4781	83.4522	72.9758	110.885	81.995	89.7488
-	ENSSSCG00000000359	56.0541	47.1532	38.6992	56.9498	42.4237	36.4836	63.742	37.7972	26.4427	53.868	32.9554	66.8545	36.0848	80.1676
CUEDC2	ENSSSCG00000033359	59.4799	57.6428	55.5623	82.2414	67.0063	64.1362	85.5015	60.6389	53.9733	97.0434	55.3102	91.0619	63.3654	110.719
ZNHIT1	ENSSSCG00000033982	56.6474	46.4282	59.6517	78.9341	72.0829	66.0699	115.917	63.5141	56.6137	115.856	56.3515	94.9292	93.6657	140.26
ACTR2	ENSSSCG00000008358	68.3827	73.1682	62.5041	69.1761	70.1702	74.5092	89.6069	66.9602	79.1887	69.8155	91.395	80.6529	98.1744	100.168
ELOB	ENSSSCG00000008061	57.3369	47.4527	46.3884	70.802	57.0136	45.7193	84.1795	51.3603	39.1926	78.8219	45.2147	90.8063	69.9936	81.1852
SNRPC	ENSSSCG00000001531	52.5078	52.7035	40.239	48.5089	37.5566	35.5691	72.1969	43.1046	34.0475	70.3959	44.1936	75.4335	54.7827	74.5013
NDUFA2	ENSSSCG00000014371	48.1321	36.2084	35.3731	53.2897	44.1723	36.1863	113.22	35.7301	24.6566	62.8471	43.9116	76.1567	34.2387	62.7328
MAGED1	ENSSSCG00000012318	85.832	85.3124	94.3769	85.6426	101.81	88.2157	62.3821	86.505	81.8157	98.2061	65.9199	71.2337	67.0747	52.5946
-	ENSSSCG00000002963	49.9234	48.7107	45.386	73.6987	54.5223	52.0815	85.2383	54.5472	48.5056	98.071	58.9009	95.6573	77.5573	74.563
KDELR3	ENSSSCG00000000105	66.8022	68.8815	65.0228	91.0382	73.5779	72.4037	85.124	61.1155	63.8899	96.9492	80.6412	112.9	102.482	98.3785
ZFP36L2	ENSSSCG00000038549	63.1666	59.0108	71.3261	54.7425	132.497	147.896	66.7418	94.9763	169.084	88.1097	81.1232	95.4529	78.1476	108.803
BRI3	ENSSSCG00000037605	57.335	55.8133	51.2254	73.4878	66.9101	65.6458	54.1141	55.8629	57.733	76.2109	55.2482	74.0194	53.4322	73.8605
PAIP2	ENSSSCG00000026606	60.5647	61.4843	47.7711	58.8037	52.3592	58.0899	68.574	40.5587	48.5056	74.8964	54.8073	86.9613	47.4201	72.6164
IFI30	ENSSSCG00000013901	67.5956	59.2413	77.9087	87.4059	81.9487	81.475	89.7618	76.9763	79.4405	103.167	68.1983	78.6875	59.9106	86.7236
-	ENSSSCG00000029003	45.6357	42.6562	38.7282	62.611	45.4866	41.5076	129.624	49.4934	44.1141	112.483	65.1755	130.663	81.9327	80.1239
MDH1	ENSSSCG00000025751	30.8657	31.209	19.4287	32.1293	20.9654	21.9916	35.4876	24.1937	22.1442	42.4137	32.0225	49.4052	31.8362	63.0241
H2AX	ENSSSCG00000042208	57.8009	61.5868	53.1174	72.4182	39.8245	38.4445	55.9457	58.8742	39.3161	44.1769	32.112	54.8946	47.1952	48.4398
FCGRT	ENSSSCG00000003187	77.7228	79.8582	79.4639	85.8895	77.4292	69.4829	73.1596	76.581	63.1694	80.3129	58.5204	69.3031	64.0213	92.4819
SS18L2	ENSSSCG00000027711	47.966	43.0998	34.0009	55.8346	50.379	44.4349	102.567	44.2818	38.2064	63.9586	41.9105	88.4869	52.3317	99.4904
SLC3A2	ENSSSCG00000022404	86.7191	88.7547	70.7694	65.4225	59.8628	56.8485	60.1093	75.8963	59.6283	54.8902	53.8989	43.8111	56.05	47.5239
WSB1	ENSSSCG00000017752	56.5732	61.4371	93.835	78.5313	91.764	98.2059	88.9728	76.1945	84.8745	67.0876	93.6831	88.432	87.9751	89.9732
CALM3	ENSSSCG00000022545	83.2507	80.5245	67.7699	68.3182	71.3458	60.8016	54.8683	64.2024	58.4984	59.0164	56.9576	64.5525	54.0056	64.8282
AKT1	ENSSSCG00000039139	82.5032	80.5956	75.3691	72.7969	68.4735	59.4901	54.6615	68.9526	56.3506	63.2958	51.097	54.8803	51.2678	48.1588
SLC38A2	ENSSSCG00000000808	73.8323	77.1636	82.8958	65.5624	95.2075	87.9962	71.8003	66.308	83.8437	50.958	96.9414	75.161	93.1096	95.6057
OTUB1	ENSSSCG00000013045	67.172	69.0302	56.5189	72.5806	56.8801	53.0849	58.8839	60.208	46.8468	68.842	50.9751	62.2798	52.2202	61.6817
TSPAN31	ENSSSCG00000036731	57.9781	52.3307	55.7549	74.5709	63.4278	58.1107	96.5729	53.455	51.1264	85.0568	62.8918	101.553	77.4574	97.3434
-	ENSSSCG00000046461	64.8779	51.1319	48.046	54.2466	65.1663	59.9327	80.1815	52.7125	70.596	77.1751	48.7945	75.2174	53.6578	90.8584
MVP	ENSSSCG00000027946	64.7446	58.5004	89.5338	94.8663	103.199	97.914	65.4346	102.364	99.7116	113.611	66.4575	79.9615	61.3736	87.018
-	ENSSSCG00000007609	73.504	70.8344	51.994	68.9723	50.0933	45.1765	67.1347	54.6559	46.0607	78.8472	54.6835	68.8722	63.5822	51.8763
UQCRC2	ENSSSCG00000007845	44.8996	44.245	32.8374	47.6239	36.3778	38.0743	63.9796	36.335	38.4482	62.2215	42.1927	69.6966	60.9543	61.5148
ARL4C	ENSSSCG00000034293	95.2665	95.0176	111.962	88.4442	114.037	98.3618	58.4586	77.5122	71.8855	50.626	65.796	54.674	78.9517	35.4087
PPP1CB	ENSSSCG00000008540	57.1906	60.1292	49.5355	67.2043	56.5027	62.3109	68.3608	46.8557	56.1258	59.4298	71.3362	73.762	89.4857	72.7765
FZD1	ENSSSCG00000036436	37.4182	39.5659	180.774	127.38	132.765	142.49	115.81	138.399	116.574	81.5589	107.228	79.5077	107.507	88.0431
CCNI	ENSSSCG00000008987	69.4198	67.7244	61.3843	79.96	91.8198	94.3431	70.116	71.4871	88.0831	71.656	69.3472	73.1778	85.2741	80.3153
GOT2	ENSSSCG00000032985	39.708	38.8168	36.995	40.3895	37.6425	38.0338	42.8655	46.4559	44.1443	54.0522	45.8912	46.3488	42.8686	53.7596
PABPC4	ENSSSCG00000003660	44.6797	49.5489	49.5235	41.9674	63.0456	56.2044	51.9494	85.1303	86.6049	91.0967	70.0513	66.5028	73.6578	69.0241
STRAP	ENSSSCG00000021410	50.0194	55.0361	42.7211	56.2731	46.362	44.7523	80.7694	49.4513	50.8818	69.9061	70.1087	72.0744	58.8545	91.7649
NFKBIA	ENSSSCG00000001952	32.9326	34.709	146.527	149.778	44.2983	43.1098	194.129	167.268	40.3184	57.4816	163.519	44.1065	148.721	45.1181
TIMM17A	ENSSSCG00000037431	44.1749	43.4546	33.7249	45.8568	32.1446	28.9423	64.0802	41.1549	32.1663	54.6882	52.8015	76.3454	59.4985	54.2686
TRAM1	ENSSSCG00000006193	69.8383	71.5883	51.3705	66.7123	54.5385	59.3472	71.2481	52.5899	51.7298	54.9573	76.1558	65.5514	87.1325	89.5892
QARS1	ENSSSCG00000032031	61.8858	63.7837	57.876	77.4326	62.0978	62.1207	70.3815	63.2374	62.4578	99.3572	55.7512	77.8697	65.3542	90.503
ISCU	ENSSSCG00000023380	57.4443	56.9124	47.6648	59.0527	46.6753	44.451	64.3124	43.4517	43.9199	63.3819	48.0305	63.8353	59.4777	69.6232
RNH1	ENSSSCG00000032010	61.1708	58.151	62.1798	74.1418	62.896	56.4512	58.319	65.2877	54.3269	87.1187	47.8896	70.0688	68.2236	79.5829
MICOS13	ENSSSCG00000013524	48.9113	38.2435	37.7204	50.4877	39.3466	35.9508	98.3302	37.0257	32.4654	67.5622	36.3062	76.1584	52.7076	43.3714
CINP	ENSSSCG00000002530	47.9706	48.915	49.4683	73.2798	49.6125	50.5905	82.159	54.7876	51.2646	106.098	64.7311	100.582	83.2548	85.1698
GABARAPL1	ENSSSCG00000000645	50.1508	51.7706	78.2052	75.3342	76.8605	71.9337	62.5967	67.3918	68.5633	61.9504	63.5037	56.853	68.9153	65.9844
PSAT1	ENSSSCG00000005287	102.522	118.794	46.3044	48.6489	38.6632	39.4097	56.3185	41.6277	51.8104	76.5716	50.4884	78.9621	56.9555	91.0072
EIF3B	ENSSSCG00000039390	55.9602	53.1094	55.6676	54.7717	52.3971	48.9562	41.8418	71.4332	57.8977	67.3904	44.9247	52.8188	41.3579	61.2456
-	ENSSSCG00000003261	44.7158	29.0086	37.0281	51.7802	52.7388	43.0889	60.6229	44.0302	34.0088	61.2705	33.3285	51.1467	30.1736	62.4786
CNBP	ENSSSCG00000040879	37.9929	37.7119	34.6255	49.8309	37.3005	40.7027	62.6733	38.6123	39.8344	60.6557	54.6253	64.1112	52.5599	66.6737
SAP18	ENSSSCG00000028865	50.7632	44.5753	39.4405	57.3471	46.3385	39.5135	81.5695	40.0225	30.8235	70.2514	45.9456	74.943	59.373	67.9594
HADHA	ENSSSCG00000008571	42.0962	40.3636	38.8904	40.4407	40.2526	37.0998	42.7611	49.7172	41.0135	59.9604	50.8176	50.012	43.0061	35.9469
-	ENSSSCG00000008222	56.8842	51.4721	47.856	64.71	56.042	53.1343	69.445	40.5938	43.4488	74.0729	53.8345	74.9052	72.7604	94.9066
TMEM45A	ENSSSCG00000011965	62.2032	58.612	63.006	81.3329	83.3837	78.8883	118.626	69.9967	78.1327	98.0362	91.5703	119.222	119.547	110.08
ADRM1	ENSSSCG00000038718	66.3379	58.3248	58.8916	65.885	51.4856	48.4636	45.5978	58.4273	47.7053	63.2975	39.6428	53.7202	39.7367	46.8245
CIB1	ENSSSCG00000001858	55.2979	52.4641	50.7593	75.9477	55.6525	45.8656	79.0543	52.0656	40.5392	68.1298	47.6079	85.6693	67.0928	111.711
ARCN1	ENSSSCG00000030053	55.5814	58.907	63.0463	75.9262	67.018	71.1321	85.7031	67.4464	69.6371	75.8336	95.8959	81.7016	82.2996	81.9153
PHYH	ENSSSCG00000039244	23.5288	22.7625	27.2395	44.7026	34.9055	32.9307	66.9989	38.7179	32.5083	62.077	50.6248	74.7588	48.4787	61.7164
RNPS1	ENSSSCG00000008048	54.162	53.8422	47.0424	56.5961	47.6439	45.6316	51.9827	49.9908	47.6265	59.5685	47.5558	53.4108	55.8085	59.0573
-	ENSSSCG00000027907	57.4168	54.0048	65.2359	56.3998	73.4327	63.3113	71.7135	71.7538	66.8586	63.2471	49.7034	56.1338	55.503	61.9712
-	ENSSSCG00000051428	12.3025	11.2335	45.0069	53.5521	57.917	53.4531	131.565	56.2641	43.9303	99.4477	72.9782	107.394	81.9759	88.1416
APH1A	ENSSSCG00000028297	60.3262	60.8977	59.6054	74.3005	60.031	62.5538	63.4853	59.3657	60.3678	71.7881	65.8175	68.384	57.7475	80.4473
BZW1	ENSSSCG00000016094	54.7319	57.0159	41.7246	56.3956	41.5928	45.6179	67.2555	41.6092	44.3979	63.9968	65.6439	77.9926	70.83	65.1583
ADI1	ENSSSCG00000029161	45.8013	47.088	54.251	75.7228	54.9632	47.7707	73.1686	54.8478	48.2075	85.4373	51.7496	73.2828	64.9298	71.0261
SDF2	ENSSSCG00000017772	49.4693	44.598	56.7082	65.6919	59.6799	56.419	94.778	54.1585	49.5117	78.9648	73.6137	88.5324	58.7471	101.416
HILPDA	ENSSSCG00000031109	40.2579	37.7413	60.3339	73.9407	80.3573	86.0844	87.4293	54.4328	66.8875	84.3166	68.6486	82.4612	61.7472	117.512
MRPL40	ENSSSCG00000034014	52.0042	49.0174	38.3445	56.8224	33.6986	30.9402	61.0798	41.4759	29.928	61.1431	39.5732	65.5537	24.8506	35.7017
CTSC	ENSSSCG00000014924	47.9008	50.6645	44.6551	39.6947	51.5292	51.4243	78.9797	76.9031	69.1701	60.6867	93.9392	66.7572	93.633	72.9331
AP2M1	ENSSSCG00000024437	72.3226	71.7893	47.5864	58.7967	48.3427	43.0998	53.4003	49.3528	41.9887	59.6628	41.8186	50.1852	56.3172	44.0494
MRPL33	ENSSSCG00000034129	32.3597	26.6857	18.9492	30.3101	26.2898	23.0117	85.697	22.2661	20.0743	46.9481	30.9833	62.5801	44.1183	33.4433
SLC39A7	ENSSSCG00000001475	68.3281	66.1805	77.7265	59.2863	76.2083	69.585	72.5083	69.6241	69.8618	58.1775	66.3647	53.5362	55.6778	40.8923
LMAN2	ENSSSCG00000014040	56.1033	57.5745	52.6606	57.4349	53.3111	46.5719	68.7637	60.271	51.1583	74.1904	49.4357	73.3288	64.6977	69.6992
ABHD17A	ENSSSCG00000013442	73.6626	71.6224	67.7846	80.7174	63.0571	60.6747	56.032	61.7805	50.3916	61.0537	42.0024	49.8453	51.1125	41.6314
MESD	ENSSSCG00000021587	61.8222	60.957	52.5912	62.1316	54.3528	52.377	72.3261	54.5043	49.3579	68.0161	63.6828	63.9441	63.3156	65.0325
-	ENSSSCG00000006564	64.6275	62.2648	52.3681	64.1672	54.988	51.8644	70.2849	48.0909	50.1046	87.0066	57.9903	89.4076	52.4972	82.2935
STOML2	ENSSSCG00000039782	45.4409	45.8467	39.6087	50.9758	40.7598	38.9778	68.985	43.1355	41.8779	65.265	46.5766	61.9887	43.0375	73.366
SSNA1	ENSSSCG00000040396	52.6895	53.7133	50.8234	63.749	49.4022	42.5132	72.1079	45.429	41.3475	75.3161	42.8375	89.1693	82.4533	54.4373
REX1BD	ENSSSCG00000040666	52.6258	45.4583	39.6051	48.8114	45.4685	35.0808	58.8311	38.3117	34.9938	61.6174	35.8395	67.0355	35.2062	117.579
PRR13	ENSSSCG00000000273	59.1213	56.4679	46.1529	65.6404	48.8735	45.6798	64.798	50.1902	45.7922	75.4441	52.6578	75.104	46.3143	60.2224
PDLIM4	ENSSSCG00000014274	97.753	87.8824	74.7106	72.643	92.0796	75.4881	53.9701	68.082	57.8046	93.5904	38.7451	69.5979	53.5619	66.2754
SEPTIN2	ENSSSCG00000016370	70.1893	73.9111	80.8941	73.8196	81.7576	76.7864	53.7891	72.9629	68.8311	68.9416	59.7967	59.2064	57.3146	45.3051
FLII	ENSSSCG00000039324	74.1314	72.8079	70.8634	66.2151	67.5506	62.7516	32.9623	72.2844	63.2486	59.0231	42.6952	42.2442	42.2948	27.5767
HNRNPUL1	ENSSSCG00000030049	73.3491	80.4794	71.8933	73.2273	71.3451	67.1393	42.2702	72.0581	69.2767	59.6976	60.4406	51.0032	64.6945	52.2681
CCT5	ENSSSCG00000024126	48.8264	46.5297	42.7339	53.8671	44.3043	41.8418	55.4189	56.1273	49.1398	78.4103	50.9913	66.3176	47.5536	66.1611
-	ENSSSCG00000017164	64.7702	68.5073	65.1474	56.2375	72.2926	62.6855	78.1345	101.543	94.481	74.7573	70.6489	63.5311	52.8076	77.44
GORASP2	ENSSSCG00000015943	53.4471	51.5807	56.3854	64.4737	58.5135	59.4396	58.6232	58.6138	59.1458	72.4798	59.6671	62.2473	57.9239	47.0688
URM1	ENSSSCG00000005649	53.227	51.0179	52.1439	68.96	55.7299	48.74	65.7264	55.9544	45.1815	67.5687	44.5398	64.2638	52.0708	67.9684
TXNDC17	ENSSSCG00000035820	44.1596	44.6318	35.7809	50.1062	38.6168	39.142	84.7139	41.7764	42.3213	88.8021	49.1689	116.457	70.7705	49.7676
PSMA3	ENSSSCG00000005072	38.492	35.8767	30.9605	45.0889	34.4745	34.9663	76.3243	33.0566	33.1691	64.5934	56.4125	84.1879	73.718	61.1547
WARS1	ENSSSCG00000002516	78.3156	79.6484	58.0618	56.7081	58.8	54.0185	46.5928	65.3605	65.7879	77.3624	54.1636	68.9466	47.7852	62.4663
EPN1	ENSSSCG00000039670	71.4515	68.1179	67.6003	55.6542	61.8503	49.7165	41.6208	66.1912	54.2918	53.8912	32.4104	44.9982	39.1618	32.4745
RAB1A	ENSSSCG00000008359	44.3884	44.1493	51.4577	62.8783	54.4416	60.3328	73.9035	52.9887	59.4325	69.9773	79.9206	91.058	71.5239	88.0248
RFC2	ENSSSCG00000028504	63.5833	62.4234	40.771	63.981	50.3011	49.1808	63.7277	52.8244	49.0241	70.4308	51.3237	78.932	51.1025	87.1168
NUDC	ENSSSCG00000003566	52.1842	50.6748	49.3892	55.123	52.8628	46.3627	51.0076	53.1856	47.0513	62.1771	45.763	63.5855	40.4031	58.563
-	ENSSSCG00000034927	54.9844	53.9837	54.3245	55.2543	58.2301	54.2613	44.1522	64.4916	63.4351	70.5152	49.1589	54.7823	51.9703	40.5048
KLF10	ENSSSCG00000027480	51.9895	53.1624	97.4798	98.4414	64.8766	67.7462	87.0543	92.5516	68.018	58.0405	102.581	55.0846	100.543	55.4632
CIAO2B	ENSSSCG00000033027	60.5683	50.5293	43.9808	64.3857	53.4366	42.9456	62.6606	41.9541	37.7784	58.205	51.6202	70.3811	26.4364	48.0983
NEDD8	ENSSSCG00000031938	45.8116	40.7706	36.5833	49.8449	42.6892	37.4572	91.2918	34.2072	32.7086	56.9273	41.775	71.3558	43.8045	84.5043
SSRP1	ENSSSCG00000029059	53.9806	55.643	50.4582	54.6597	54.2692	53.3349	50.1578	62.45	65.9003	80.4974	61.536	61.631	57.9774	64.9328
PLOD2	ENSSSCG00000011689	67.539	70.1902	56.851	57.7219	72.3374	75.5178	100.038	62.0806	79.2557	56.5739	88.2861	75.71	92.3187	91.0725
NUTF2	ENSSSCG00000030295	53.0241	54.6956	36.1618	47.246	35.9736	36.6964	49.9795	39.9595	38.2823	58.7474	43.7775	62.7161	31.1017	44.3581
NENF	ENSSSCG00000038614	45.451	38.3981	48.2428	62.1062	54.3815	45.9665	79.6643	49.4844	42.858	74.1891	49.8022	92.5632	62.9511	99.6698
MRPL24	ENSSSCG00000006469	41.0327	40.386	40.7316	53.4316	47.6201	41.1046	85.8546	43.2976	41.6008	77.5288	44.556	68.2952	58.6241	63.7359
FMC1	ENSSSCG00000038700	42.2583	41.1227	27.624	50.1909	44.4344	36.4782	88.2304	26.1026	28.4864	58.3015	23.7243	66.6575	26.0443	128.912
CAPRIN1	ENSSSCG00000013305	52.3018	59.5497	60.1068	61.4704	65.2965	71.4323	57.752	62.5021	72.66	69.4707	78.5363	76.9729	68.9633	64.5849
HMGN1	ENSSSCG00000033733	53.4634	56.2811	40.9214	57.1067	42.6121	39.8561	63.7276	39.8569	39.2206	70.5153	54.3051	86.6722	66.338	77.5349
RUVBL1	ENSSSCG00000011620	44.0714	45.4456	35.1743	40.7848	39.2502	33.3609	53.3356	39.8361	41.7089	67.3826	45.4892	63.8884	51.6318	45.7149
EIF3H	ENSSSCG00000006016	43.3947	40.0041	33.5764	55.5123	37.5838	40.5048	79.45	41.7047	40.8671	86.597	61.934	89.1423	61.9403	86.4141
-	ENSSSCG00000007692	53.3091	55.6393	54.9326	54.0538	55.6443	58.6507	55.8476	55.1988	56.1861	51.0127	59.8204	53.947	58.0907	55.2023
PKIG	ENSSSCG00000022998	83.7422	76.9096	52.3843	64.2448	36.1681	37.5769	32.1345	25.1171	19.1566	21.3368	21.1469	28.2533	28.8651	26.3365
STMN1	ENSSSCG00000026257	92.5817	93.1893	24.1184	40.9359	21.2375	20.9848	40.7393	25.4675	18.3061	33.1168	35.4463	35.2204	29.5045	42.8762
REEP5	ENSSSCG00000022048	40.046	40.0066	44.3326	55.5675	56.6587	59.3217	77.8085	59.4445	62.1097	66.9096	83.6683	88.5778	86.7308	86.9664
-	ENSSSCG00000007088	47.0099	50.6332	36.7221	62.0029	41.5372	44.0568	75.3268	48.0107	48.2227	81.1702	65.2814	97.5866	79.032	66.9759
PIN1	ENSSSCG00000039619	40.6479	41.4723	46.1987	55.5623	44.7996	38.5282	68.329	42.7166	36.5444	68.3099	37.2795	71.185	43.8319	96.5669
EGLN3	ENSSSCG00000001963	54.8109	52.4834	60.6942	82.2633	81.4192	93.9467	54.2339	57.1582	72.6628	54.0763	66.0026	66.3446	74.1548	75.9437
DDX5	ENSSSCG00000032092	44.028	46.9334	61.4267	67.4173	41.6076	44.7499	75.48	54.854	42.4309	50.5408	68.947	54.845	70.6552	57.7441
PCBP2	ENSSSCG00000000274	60.4011	59.2111	55.3734	67.4401	64.1786	62.9295	53.9137	58.4613	61.3187	73.7657	53.2615	63.9715	59.5193	59.7753
EMC10	ENSSSCG00000039372	58.1083	59.4024	65.6777	56.3536	59.7884	50.375	66.4979	62.978	52.4958	68.5956	46.1846	63.2096	39.7162	64.647
ID2	ENSSSCG00000008645	47.2718	48.2478	88.5621	109.559	93.8017	93.3375	68.3431	51.4299	48.7617	58.9306	58.0429	70.1518	64.5032	76.3603
SLC39A1	ENSSSCG00000006561	66.1967	66.6934	59.0978	68.9943	62.9914	60.626	62.1073	60.1465	58.4823	68.3907	54.4861	56.2048	39.6998	56.3167
PSMC2	ENSSSCG00000015424	43.7378	47.3939	39.554	54.6718	41.4593	41.0393	60.3407	37.6216	37.7734	64.3197	51.7352	68.8387	56.3226	59.9174
FBLN2	ENSSSCG00000011609	85.515	78.4075	62.5368	29.624	55.0536	39.3609	44.4566	81.6261	76.4982	30.9841	53.9236	30.7594	43.2121	33.8975
IDH3B	ENSSSCG00000007173	36.9529	36.2685	32.9324	40.4169	29.5584	28.0105	42.7941	33.1306	32.3978	52.89	32.5389	43.6316	31.0649	55.461
EVA1B	ENSSSCG00000033892	99.6799	88.9643	47.6564	65.1522	49.7839	44.7951	56.4802	47.4449	38.8803	58.2787	33.9435	51.1352	44.9461	61.8064
C1QBP	ENSSSCG00000035048	43.7089	38.5145	33.6822	43.0468	37.0381	35.9043	63.6446	41.2117	36.286	68.7558	47.4708	67.7674	49.7276	55.1931
RER1	ENSSSCG00000026626	58.8249	52.6703	49.3015	63.8406	53.8069	50.9196	72.3762	54.0344	49.0459	76.9315	53.5624	72.3102	60.9248	72.1678
-	ENSSSCG00000010058	43.5332	41.8405	34.5887	44.6344	35.6452	32.8936	59.9729	36.1977	32.0797	60.5244	45.2353	77.7171	52.4228	58.8059
GALK1	ENSSSCG00000017203	50.9152	47.4964	52.9001	67.4167	52.9454	44.2308	57.7459	55.564	47.5061	82.9667	38.5677	67.0282	51.4515	91.7189
TXNDC5	ENSSSCG00000034131	85.9809	81.908	78.4867	62.6403	76.041	66.0788	52.4948	76.1531	62.0245	61.3976	52.9507	46.2646	58.8087	56.822
-	ENSSSCG00000031773	40.6645	39.0417	47.2089	78.0358	56.9349	63.1483	96.31	60.1784	66.6552	103.092	79.6948	118.917	88.1402	100.273
TGFBI	ENSSSCG00000014316	93.1127	84.0354	109.45	61.9676	132.802	147.098	57.9147	87.0125	105.823	83.7184	63.3989	69.7458	70.2753	88.9677
LTA4H	ENSSSCG00000000891	43.0102	39.7062	47.6811	64.0782	58.8622	59.053	70.982	66.2497	67.8481	89.215	77.3447	86.1326	66.2275	63.4457
-	ENSSSCG00000003132	64.9091	59.2561	63.2071	63.5982	74.3175	67.3584	58.0765	68.2917	68.144	78.9809	49.224	56.0189	62.7221	74.0615
EIF1B	ENSSSCG00000011270	49.0406	50.9684	33.9981	45.9194	30.6386	36.1071	56.0787	37.8297	37.8394	47.2665	48.574	58.0893	41.5664	130.707
S100A1	ENSSSCG00000031053	10.6364	9.62483	7.70138	9.73616	7.67136	6.59747	20.3314	12.3753	11.9217	28.5243	11.2028	22.023	7.95494	22.3314
-	ENSSSCG00000037777	53.1622	55.265	57.2754	74.9285	65.3605	57.8035	56.1937	58.7424	54.0766	73.9486	51.8551	56.1294	40.0321	53.8595
HNRNPA0	ENSSSCG00000042630	65.0764	68.1408	63.4985	63.5055	53.6584	49.0478	45.4861	60.5356	51.0363	44.6993	43.3864	43.3863	41.3779	28.4217
SLC1A5	ENSSSCG00000003105	76.6898	77.4463	66.8207	42.4892	68.227	61.0293	45.7674	74.5319	77.4918	43.712	45.8503	45.0782	46.1985	37.5779
-	ENSSSCG00000032003	52.2979	47.5499	49.697	74.1312	55.4109	50.2727	67.9316	58.0123	40.8496	82.2273	46.318	72.3702	47.6718	84.8059
HNRNPA3	ENSSSCG00000015988	53.4064	53.9646	44.2841	44.954	43.1639	45.3512	53.1704	44.1674	46.768	59.4006	64.0746	64.0569	55.9898	59.3464
COMMD3	ENSSSCG00000011082	46.8688	52.1017	35.3474	53.3746	41.9428	42.799	67.1168	37.4828	36.6962	53.4836	50.2239	75.4053	68.6677	112.029
-	ENSSSCG00000040577	53.4867	52.8074	47.0493	73.2652	38.4356	39.1767	80.5635	53.5837	42.4737	66.2414	64.9184	70.5462	52.0251	56.7263
MRPL38	ENSSSCG00000017196	47.0599	46.8618	41.1697	51.1145	41.2141	38.3067	48.3026	48.5551	39.7313	61.4684	26.8532	48.7661	28.9771	34.2481
COPZ2	ENSSSCG00000017526	51.7877	47.7808	52.8366	66.1341	50.5685	42.9598	88.3166	52.9562	46.2554	80.7028	45.0171	95.4752	99.3609	45.1998
PSMD14	ENSSSCG00000015892	39.4636	41.2453	29.5166	42.3789	33.1874	33.3661	50.9393	30.2485	35.3786	55.1105	46.2361	56.7313	51.5622	36.4712
TPD52L2	ENSSSCG00000036712	48.5528	50.1236	47.1383	57.3813	54.2663	48.9719	60.6145	56.7861	51.6722	74.7289	50.9071	72.5269	54.5969	93.9155
ATP5F1A	ENSSSCG00000004499	38.1884	36.9842	28.1875	35.584	29.3263	28.2902	40.6828	33.0997	29.7776	48.1933	35.7647	47.8643	40.9611	40.7017
PRMT1	ENSSSCG00000003189	47.4711	48.7001	35.8149	47.7626	33.2554	33.4857	44.5602	35.2977	29.8441	51.5587	32.3697	51.527	36.7068	48.8463
PLEKHO1	ENSSSCG00000022784	84.7591	79.7718	55.9278	67.567	55.6418	56.3753	32.6544	35.9211	35.3987	37.8657	33.7317	42.8135	46.7504	46.1695
NT5E	ENSSSCG00000004291	82.3663	77.7992	105.46	96.1942	111	97.1183	67.8765	63.0834	66.0019	67.0222	60.1566	69.0885	80.7865	97.8971
PSMD6	ENSSSCG00000011494	37.4395	43.0863	41.6679	54.9116	43.8218	45.6945	59.6086	43.2169	42.8284	67.8264	63.6941	64.693	57.6493	72.4713
USF2	ENSSSCG00000002885	56.937	57.8638	54.563	61.2743	55.9449	50.4475	48.6213	52.9445	48.5637	56.6108	35.8667	47.411	39.0471	38.0462
CNDP2	ENSSSCG00000004870	63.3967	60.6634	56.3308	68.7397	60.4674	58.4931	48.0859	60.1367	55.8704	69.05	52.5324	62.696	55.2974	54.1035
-	ENSSSCG00000018076	12.8953	8.39901	10.0275	3.17761	4.58274	0	2.91565	2.4402	3.45859	1.35073	3.97125	4.98518	20.2335	69.2797
RHOD	ENSSSCG00000022726	73.4521	69.3197	69.9862	95.2981	68.2953	60.9186	66.4137	53.6638	40.5609	69.9765	39.6607	65.8709	73.1768	41.946
SMDT1	ENSSSCG00000020945	32.8484	29.8598	24.9142	34.5274	29.2888	26.8017	66.671	26.9143	23.2518	43.578	34.3434	52.4985	35.6769	44.3069
MARCKSL1	ENSSSCG00000031380	71.0488	74.9399	49.5671	56.6037	45.5655	45.5982	44.6955	49.243	33.9231	38.4633	42.6708	34.4247	52.8153	34.6634
UBALD2	ENSSSCG00000023423	79.0903	77.8382	40.1916	45.6164	33.4563	27.0953	43.7603	43.2748	29.6437	46.6962	25.6228	45.4575	55.9934	43.6804
SEC11C	ENSSSCG00000004912	43.2188	41.6074	27.3056	41.2736	29.215	27.8408	61.3258	28.1436	23.5568	56.4604	38.7065	64.1426	41.3489	44.3077
MCRIP1	ENSSSCG00000039424	75.8813	68.8073	65.5055	64.508	61.8647	51.6297	42.61	49.6736	40.9266	49.1943	32.4001	47.1834	37.7009	20.8764
-	ENSSSCG00000006559	45.5765	44.4026	37.3788	45.5143	36.0949	36.0557	66.9992	39.4378	32.9135	49.7496	44.3189	48.008	28.7639	95.5747
LOXL1	ENSSSCG00000001914	148.826	134.979	61.4622	50.6705	41.4729	41.4095	33.4683	46.0825	31.1022	29.0224	26.8422	22.2579	29.3382	19.6367
NDFIP1	ENSSSCG00000025295	57.7823	57.4375	59.8318	75.0573	67.6108	65.273	63.903	50.975	49.7822	63.4706	52.7531	72.2524	61.1949	69.5006
HADHB	ENSSSCG00000008569	29.0618	27.4749	23.5463	31.0502	26.7787	26.7571	39.217	29.0807	27.9716	44.7436	38.4948	52.9752	49.8234	37.0382
ADH5	ENSSSCG00000009185	39.7514	38.731	43.0892	59.6253	47.742	50.2116	74.5415	44.515	49.1566	76.9653	58.6461	84.896	52.4083	29.2377
CCDC85B	ENSSSCG00000012968	56.9923	50.3909	72.409	87.725	78.0579	71.9214	63.9388	64.249	56.9344	67.6981	49.8914	70.3536	36.0369	99.0589
SLC2A5	ENSSSCG00000039651	17.134	14.2816	106.044	103.457	123.168	120.602	92.2747	81.877	100.377	99.8456	72.6909	89.2681	80.9281	109.559
SARAF	ENSSSCG00000033402	47.5768	46.4688	43.22	60.5168	49.3683	54.9734	63.2332	45.9118	46.3985	47.3746	57.3236	63.5847	67.5652	50.8906
GPX8	ENSSSCG00000021973	38.4564	38.5782	35.8951	52.0035	45.5749	45.6239	85.4276	38.7786	46.1906	87.9365	70.4429	108.645	88.2159	81.1151
CCN2	ENSSSCG00000004192	54.5364	51.4245	85.3827	44.2215	68.4394	58.8693	47.2898	60.3147	66.4309	31.3483	48.7579	44.5746	47.1259	36.6797
SERTAD1	ENSSSCG00000026931	46.7827	43.5303	50.6243	59.7316	28.3191	25.8079	64.0469	46.1137	22.6167	36.3182	39.7621	35.9635	54.5566	39.3475
-	ENSSSCG00000025499	64.1543	50.6053	66.3437	70.4475	80.898	73.2864	61.7724	63.3366	64.1931	69.1237	49.0274	70.2642	68.0948	38.1448
CHMP5	ENSSSCG00000010995	45.9055	45.9367	37.9115	57.8057	47.5517	53.3841	61.7575	31.5477	40.6067	61.3444	61.041	76.349	71.8249	116.612
RBM42	ENSSSCG00000002905	54.0203	53.7658	51.8814	56.9538	43.741	41.4138	44.9535	53.4058	38.8159	55.7084	36.4312	48.9032	33.2357	59.7896
RTCB	ENSSSCG00000000158	47.9439	46.3665	48.3193	55.8586	46.616	44.4303	52.1588	49.2996	48.3131	64.4127	46.7396	61.624	51.1882	54.0538
RAD23B	ENSSSCG00000005436	47.4913	48.9729	56.892	55.7241	53.0834	56.7956	55.9847	60.8328	62.8576	62.1236	64.5066	61.3628	52.2745	79.8284
CYBA	ENSSSCG00000031493	35.7058	39.3033	74.8123	72.8154	66.6906	77.7407	92.7486	73.6629	86.4847	137.319	49.88	93.9024	54.5511	77.0166
EIF3A	ENSSSCG00000010679	53.1704	50.3628	61.6478	44.2897	59.2275	58.9589	42.0497	69.5645	73.0968	48.1639	66.1192	41.7623	59.5684	46.5844
PTP4A2	ENSSSCG00000039885	47.4236	44.7486	36.5594	40.9247	34.3595	34.9252	41.8456	42.3189	36.9792	36.4121	56.6127	46.572	37.7505	61.4513
CLEC2B	ENSSSCG00000000656	77.7631	65.4379	42.6267	56.6449	37.9464	44.3156	29.2776	10.4488	9.07137	23.1721	19.7662	25.4286	34.6043	67.3625
P3H3	ENSSSCG00000000681	59.8046	61.0061	76.2505	52.2943	72.9987	61.1427	57.3361	72.0747	66.5359	58.7299	43.5604	49.6415	43.7428	65.0545
ATP5PF	ENSSSCG00000038399	31.7348	25.753	22.5149	34.2536	26.7507	26.5612	62.1294	24.0488	20.1984	43.8326	35.7368	55.1821	49.199	55.8874
SCAND1	ENSSSCG00000007312	59.4306	52.3465	56.7231	76.9957	44.8844	43.3461	46.2502	53.7071	37.2504	53.7964	36.3885	47.8527	34.8939	68.3164
TCIM	ENSSSCG00000032320	53.5442	65.3062	87.1811	93.5944	31.0424	30.6923	74.0016	51.3825	24.607	18.0749	83.6215	28.1173	92.2603	38.6984
NDUFA6	ENSSSCG00000000045	39.5473	33.2723	25.4592	34.4559	27.2216	23.9205	39.5396	27.4034	23.8389	39.9654	33.2476	52.5194	31.0498	46.2584
-	ENSSSCG00000022058	32.7508	35.3335	47.6694	66.2962	60.8461	54.9707	102.271	63.6825	62.5286	113.245	66.2536	108.323	52.9251	81.1172
RPL7L1	ENSSSCG00000026472	43.4715	38.8448	31.9978	43.1082	32.6136	33.772	63.0337	39.206	33.0632	60.4684	53.5194	69.5633	50.99	40.8734
ANAPC13	ENSSSCG00000033057	37.9903	41.3669	42.4943	57.3648	44.2721	42.6975	86.684	38.2932	41.0398	71.0973	60.7596	111.251	70.9958	84.1776
CAMK1	ENSSSCG00000011550	38.7113	35.4044	53.7388	70.3908	75.7438	84.4294	81.2254	66.1657	76.7209	99.9312	58.1779	94.9504	76.3612	123.412
COPG1	ENSSSCG00000011616	61.8265	61.5746	63.9092	65.6332	68.4041	66.1519	36.8157	65.9326	61.4056	73.7264	51.7128	48.3987	46.548	63.8063
DNAJB1	ENSSSCG00000013784	36.1048	37.5282	34.2506	40.6414	28.2692	30.5263	34.5516	29.9115	29.4359	37.1009	31.7878	37.8089	31.7041	45.1602
-	ENSSSCG00000034570	24.8926	27.5798	37.9624	83.4386	35.798	26.511	50.3092	24.1625	29.1729	60.3844	27.4968	50.8251	31.3366	72.6046
SKP1	ENSSSCG00000038628	43.1993	41.1797	31.5838	48.6564	37.5465	38.4378	54.8202	31.1066	34.1109	59.03	48.1245	68.4131	49.703	40.0563
RGS2	ENSSSCG00000037241	19.5196	16.4395	50.9666	73.2473	70.0254	67.603	58.8041	34.6794	36.06	47.0006	47.2648	52.3176	47.7703	33.3206
PLBD2	ENSSSCG00000009872	40.11	36.1615	107.452	59.6468	122.823	114.693	54.7597	106.411	121.872	81.5935	60.9031	57.2517	48.429	53.138
SERPINF1	ENSSSCG00000017818	44.4886	44.0331	50.5987	51.648	47.741	49.972	79.6034	69.2719	60.3637	86.8377	59.1957	70.1864	67.1893	80.7618
IPO5	ENSSSCG00000009509	59.5932	61.7647	33.41	39.7487	34.7014	35.782	44.3739	40.2432	40.535	53.271	50.8121	50.322	51.3812	56.9191
RIOK3	ENSSSCG00000029518	34.2347	37.1785	50.8299	60.3817	62.8206	67.3145	74.2396	60.5496	71.2803	83.0925	91.5127	97.6897	76.5633	82.1571
CSF1	ENSSSCG00000037449	53.6108	39.2354	88.1057	29.7698	76.353	59.7355	71.8469	120.544	123.41	65.1684	70.0908	55.8126	68.5501	45.866
LSM2	ENSSSCG00000039021	55.2615	58.9061	39.3533	54.3479	43.1722	49.479	51.2578	38.7218	43.1631	71.4677	50.1517	51.3756	66.8017	52.5052
DDB1	ENSSSCG00000013094	49.8703	52.4627	68.7719	63.1912	73.0694	71.2729	38.974	75.3358	75.3541	77.5731	52.5895	48.9856	43.8966	46.7541
COX6A1	ENSSSCG00000039265	42.8669	38.3018	36.6906	58.4529	41.2326	36.7503	68.024	39.4634	32.4634	66.6576	42.317	85.2096	49.2842	77.881
-	ENSSSCG00000032591	52.3146	46.0055	61.0045	87.5421	67.4036	62.4472	66.6184	33.0313	34.7099	51.4993	37.0637	49.1977	56.4365	84.3446
ERGIC3	ENSSSCG00000034045	46.5767	44.63	57.7559	66.4904	70.5288	61.3508	82.2982	66.2083	58.5721	87.1585	53.366	74.9576	53.2065	80.5994
CTNNA1	ENSSSCG00000014339	62.7939	60.4723	59.5589	61.2114	59.9005	59.8063	35.1244	56.4021	54.7567	53.089	45.1099	44.6916	43.473	43.3347
TMED3	ENSSSCG00000001773	44.5534	45.0734	46.9304	57.0296	51.2674	44.0355	79.6427	51.6663	48.0675	85.9824	44.9172	77.6238	54.5319	62.9812
SDHB	ENSSSCG00000020926	32.5325	32.1173	25.1817	36.1943	28.1081	32.1457	37.4178	27.7834	26.2363	50.2558	34.595	49.9613	37.4666	54.6277
PDGFRB	ENSSSCG00000022741	150.589	129.484	114.068	42.6814	91.2005	70.0294	27.5021	69.5892	58.9653	21.3609	34.2628	19.659	41.8354	26.8132
MMP23B	ENSSSCG00000003351	47.6997	43.6288	72.8181	62.3726	66.8708	61.7419	74.838	74.7856	57.8831	77.8235	46.4152	59.3629	60.8506	57.1491
C1QA	ENSSSCG00000003524	60.9029	55.5002	38.5174	52.516	45.9753	48.919	58.3129	53.9047	47.1372	56.4256	44.8367	65.6114	47.3202	67.31
YKT6	ENSSSCG00000016750	52.4206	52.3498	41.9697	54.5967	39.9011	36.0999	47.8431	40.3629	33.2237	53.8887	36.0574	51.3417	36.1611	55.0392
DDRGK1	ENSSSCG00000007160	40.6218	36.1246	41.0195	47.0896	44.2097	41.5883	55.2923	52.0452	45.0573	67.8826	47.0306	52.7631	60.9029	67.261
GADD45B	ENSSSCG00000022689	25.853	23.6625	40.611	46.8248	24.1512	24.752	64.6495	55.2019	46.8711	48.7361	52.5172	44.1332	46.2441	51.6428
MRPL52	ENSSSCG00000002040	51.6605	39.666	27.0864	42.8106	33.0129	29.1444	56.2335	30.1132	25.9556	48.4179	32.0408	44.5307	39.7056	50.1666
COPB1	ENSSSCG00000013392	48.3116	48.5341	47.4558	56.5577	54.5846	58.3608	66.0556	48.5356	58.4477	68.3236	76.1472	81.5779	69.4487	65.2422
MYOZ2	ENSSSCG00000032838	12.3115	9.17583	0.779256	0.709232	0.464321	0.597697	0.368195	0.676504	0.0812574	0.388748	1.43685	2.38639	4.03152	5.84862
-	ENSSSCG00000009072	49.1408	44.5224	47.0433	47.1973	55.5544	54.2611	55.8267	51.4366	57.7434	52.887	57.6113	55.4191	53.819	50.2675
MAP2K2	ENSSSCG00000027127	51.9839	50.4306	46.7423	51.2155	47.4833	45.0684	44.2879	45.8432	38.4438	56.0432	34.3737	49.0261	37.0314	40.5688
FAM43A	ENSSSCG00000011828	74.2572	65.5153	69.3266	57.3906	76.9097	70.9801	46.6383	60.8767	77.6803	45.3935	59.0897	51.4265	62.7933	63.2308
UPP1	ENSSSCG00000030388	58.8711	49.2211	46.8014	66.8501	52.5764	57.8022	57.3251	53.6487	43.8391	72.312	39.7115	70.3624	52.3125	93.1211
PEF1	ENSSSCG00000034810	45.9459	42.1259	55.0411	70.3245	63.0778	62.2389	59.6546	56.0071	59.2612	84.209	47.8132	62.9504	53.1516	77.2156
TMEM59L	ENSSSCG00000013911	29.9108	26.3872	100.044	72.7526	111.376	83.5897	71.7882	94.9183	97.1426	92.6085	76.1264	76.0229	42.757	67.3601
JAK1	ENSSSCG00000003809	47.3043	47.8233	53.0902	50.2979	56.0235	60.0148	54.7767	79.2484	78.9483	62.2985	79.9989	53.7341	66.921	51.4281
PPP2R1A	ENSSSCG00000024413	57.5309	55.5321	50.9866	55.1166	47.1793	41.9892	33.7324	55.2541	42.0971	53.6187	31.2523	38.1732	32.2898	25.378
TXNRD1	ENSSSCG00000000843	33.4365	29.6418	58.9463	56.7722	48.2452	45.7214	48.1106	57.054	41.6449	38.8033	59.6973	33.7766	51.3645	23.3812
AHSA1	ENSSSCG00000002406	39.5878	34.6366	33.1199	42.1192	37.0839	36.1327	42.1411	36.5613	38.8126	60.4465	42.4493	55.0539	38.8342	48.1933
SOD2	ENSSSCG00000040317	23.667	19.8046	28.503	41.7068	32.3868	38.4597	52.8003	45.716	41.57	36.0974	54.8618	39.156	53.5872	52.1514
TXNDC12	ENSSSCG00000003867	42.5945	41.981	41.2702	52.4916	53.6076	49.0931	86.6006	50.8145	57.7194	70.2363	59.2033	67.9498	85.8083	60.4854
VPS72	ENSSSCG00000031869	44.9733	43.1212	46.0874	52.578	45.9554	44.8726	43.8845	53.1262	47.7331	62.4628	40.2913	55.9596	49.9682	38.323
ZFAND5	ENSSSCG00000030268	45.2528	43.9928	46.5973	54.3493	34.4808	37.164	51.1345	44.23	31.0372	29.9325	53.2546	33.1297	54.31	43.9331
TYROBP	ENSSSCG00000002919	40.4196	30.3482	44.6648	82.2021	54.2291	63.1094	60.2468	61.3864	45.0816	71.6423	42.6516	50.457	47.4932	70.9566
KLHDC3	ENSSSCG00000022901	42.1466	41.1989	45.5507	54.5131	42.0405	39.1708	58.413	50.6447	46.7892	57.7634	41.954	52.07	46.0567	56.1869
CLTA	ENSSSCG00000037131	44.8441	45.5907	37.6233	52.2779	41.2944	40.7038	56.1095	44.2505	42.5762	67.2168	47.1993	57.8325	47.6274	56.4665
TRAPPC2B	ENSSSCG00000012124	41.0533	35.6261	30.487	47.4634	34.7534	30.2449	77.5853	38.0514	33.6554	64.259	36.5449	72.167	48.2411	37.5238
HDGF	ENSSSCG00000006468	41.557	40.7765	49.9776	41.8725	48.9199	46.9321	49.6018	61.3807	54.1387	54.9949	50.7546	37.9818	47.7697	36.9506
ATP6V0D1	ENSSSCG00000002776	50.0843	53.5345	45.3002	61.0105	49.8171	46.1289	50.4066	48.9718	51.2411	69.2377	47.6233	44.8572	63.0139	71.6118
VCP	ENSSSCG00000005300	54.147	55.0521	44.4159	44.4468	43.6821	42.9578	34.5582	41.5385	39.1615	39.8677	36.1214	35.6837	34.5199	34.698
XBP1	ENSSSCG00000030996	45.8286	43.9394	47.5032	58.0231	41.3064	41.0601	57.0915	45.3744	39.2027	46.3799	51.4652	51.8187	51.4818	51.2936
DPY30	ENSSSCG00000008516	39.0976	39.6242	32.0443	49.4086	35.902	35.2013	83.4048	26.3486	31.0175	54.7837	42.0983	74.204	45.6377	68.757
FAM32A	ENSSSCG00000013855	41.2386	42.0095	36.4218	47.0534	38.3316	36.8559	66.799	37.3582	32.9694	55.8507	53.9667	61.6353	54.7509	64.4846
PGS1	ENSSSCG00000036308	50.0555	45.9947	56.2363	58.7422	60.6619	57.3316	46.9342	64.912	59.8694	72.9566	46.0171	51.9672	53.1506	54.9334
SOD1	ENSSSCG00000021355	36.6724	32.2471	27.9129	42.0443	30.7675	28.3001	50.1392	28.76	25.8427	49.7764	39.143	66.0965	36.4666	53.82
SRPX	ENSSSCG00000012234	61.0146	60.1106	37.0393	33.5017	30.0245	30.094	61.1323	40.7606	32.0217	39.6372	44.7312	39.8973	44.9676	33.5365
TIMM8B	ENSSSCG00000023599	29.6305	26.3139	21.2596	29.754	21.779	20.2544	71.2565	22.6046	17.6934	34.9981	26.1951	44.3754	44.5779	45.9358
ANXA7	ENSSSCG00000010299	38.2545	38.4166	44.013	59.9261	52.3251	50.97	61.7192	49.7871	52.0185	75.1358	58.034	72.5268	48.4534	56.3504
CORO1B	ENSSSCG00000012920	60.4442	58.4417	59.093	72.3017	57.9442	55.8691	45.75	60.5748	52.5389	79.1056	41.9029	54.0163	57.3977	38.2179
EIF4G1	ENSSSCG00000030255	51.1305	51.1721	62.4107	38.5882	56.9939	49.9409	29.5938	67.0831	62.5914	34.9373	45.7193	27.8974	33.1224	28.7579
MRPS15	ENSSSCG00000034647	28.5935	28.8905	30.3832	41.3879	33.2843	32.0025	44.0384	34.8218	29.6142	54.6725	32.4545	59.3989	24.5993	62.4661
PAM16	ENSSSCG00000007947	35.3404	31.6099	23.6978	31.4947	24.3465	22.2603	39.0847	28.4201	21.5553	42.4994	25.9716	37.6737	17.563	60.4484
CFL2	ENSSSCG00000001959	23.5685	25.9338	29.1812	37.856	33.6531	35.6925	53.0357	33.1893	38.5548	51.7641	50.5093	54.8983	44.3126	62.1386
GPAA1	ENSSSCG00000005912	51.0759	52.5822	60.5189	55.4889	63.234	58.4081	52.8452	61.4766	55.4328	68.9956	40.0584	53.7785	42.4772	57.9951
ST6GALNAC4	ENSSSCG00000005628	48.5528	46.7701	57.1179	66.5977	56.4374	54.3637	40.9398	44.7483	41.8971	58.3485	28.8935	39.0741	39.2087	39.9949
PLS3	ENSSSCG00000012597	52.093	57.4587	42.9734	55.0116	45.3503	47.0916	60.9216	45.2864	49.2539	48.9071	63.726	61.5316	62.1356	69.9252
DNASE1L1	ENSSSCG00000037032	52.9803	44.9462	45.6904	58.6511	51.0742	45.5633	54.5119	58.3172	47.1777	62.8405	44.3252	67.4489	56.7258	59.1041
AP2A1	ENSSSCG00000003199	61.3567	60.8262	56.1556	55.5232	61.3326	56.1619	35.7073	70.5469	58.6117	74.7984	37.4283	34.2994	39.7613	28.3926
PRPF19	ENSSSCG00000013107	47.1315	44.3373	47.485	45.9117	41.6878	40.5394	38.0367	51.7708	43.9242	45.6365	40.5152	36.9008	40.3052	38.7909
OS9	ENSSSCG00000035875	66.8278	58.0669	70.3897	44.2341	74.5278	66.8892	54.6943	65.8962	70.5373	49.6916	49.7745	52.534	44.1497	46.3781
PLK2	ENSSSCG00000016925	43.2311	40.2529	93.1445	90.1145	48.1663	50.0835	93.839	97.5424	51.9227	60.8859	112.925	58.3556	125.688	71.3919
-	ENSSSCG00000049384	45.8695	40.2911	38.2425	57.8207	40.7708	35.5004	57.0413	36.1683	34.2549	59.0344	44.592	65.8807	56.8661	78.9078
-	ENSSSCG00000024791	71.9837	70.7725	41.9293	56.4961	41.9984	49.2753	38.364	21.6831	29.1396	25.6056	36.8464	37.6155	38.3624	54.8429
GLB1	ENSSSCG00000024119	57.0904	55.4685	58.9507	60.387	59.7623	60.6466	56.4371	54.1078	57.3638	61.4135	52.8768	65.37	61.4221	74.1974
-	ENSSSCG00000014343	40.2682	41.1375	39.7072	45.0249	42.4392	46.5463	58.3054	44.8143	49.3358	50.8787	63.4157	58.0742	64.8153	58.745
STT3B	ENSSSCG00000011229	43.5665	46.6828	44.3758	41.3757	46.2392	48.0144	60.9884	48.0129	55.2613	44.5478	69.8227	64.3633	73.1714	57.8844
MCRIP2	ENSSSCG00000007995	11.5624	9.59173	10.8152	11.903	15.4734	11.6721	18.2362	16.3358	13.8271	21.5848	11.4094	25.2697	21.6626	19.9347
GNL3	ENSSSCG00000011449	27.5587	26.61	23.1916	26.4605	23.2851	24.7661	41.8456	31.2491	29.1107	46.6884	44.6152	53.5028	49.6808	40.7366
-	ENSSSCG00000006324	34.557	36.2424	42.1028	48.5968	53.9666	56.5455	58.4874	54.2039	64.2272	82.7904	58.139	74.0247	67.0225	60.8972
PPP1R11	ENSSSCG00000024259	50.8336	50.3627	45.8166	54.8412	51.2723	49.3229	44.065	42.5121	42.3636	52.2247	47.2533	56.7009	41.3744	72.1118
MRPL51	ENSSSCG00000039662	26.0893	26.0665	20.7101	28.9332	22.5772	19.971	47.5141	24.0348	17.9183	39.6116	25.7156	60.0351	30.8947	45.4365
APLP2	ENSSSCG00000015244	85.7351	80.1226	71.0687	41.4303	69.1367	57.1247	39.5608	51.0538	54.9713	27.5069	43.1695	31.0921	38.731	32.5123
TMEM160	ENSSSCG00000003109	46.4444	39.8766	31.4439	42.792	28.5479	27.9012	66.8758	36.9914	27.645	52.5981	35.1103	47.0371	44.2997	47.1331
ARRDC3	ENSSSCG00000014156	29.5139	30.4078	28.8054	41.7591	103.327	123.013	34.179	26.596	74.5366	69.9131	43.3804	85.1749	45.8786	95.8729
ATP1B1	ENSSSCG00000006296	55.1364	52.6924	45.7193	41.1527	51.0493	47.7048	44.4306	35.8645	38.0876	32.9003	46.0313	45.702	57.7765	48.6996
BUD31	ENSSSCG00000007623	49.3866	46.2475	34.0663	47.1905	38.0048	41.2752	54.298	34.7455	36.5656	56.7724	41.9086	52.3829	43.6287	48.8226
FHL2	ENSSSCG00000008147	34.5292	36.2619	44.0582	44.6187	39.035	33.7083	34.7065	44.7209	38.8634	43.2787	35.1179	37.9551	38.622	27.849
MFF	ENSSSCG00000031572	37.1625	38.6319	33.1821	48.5497	38.44	41.4685	60.9767	37.1651	39.7759	68.6752	53.5019	70.7494	59.2873	49.871
-	ENSSSCG00000025582	58.6535	50.4587	47.2922	50.2923	50.4585	46.4755	34.0166	45.7679	41.0545	37.7613	32.3959	31.2008	31.2237	32.1324
NDRG2	ENSSSCG00000030309	32.6514	33.9936	23.7372	29.1288	27.5468	27.2477	43.1682	39.0997	31.8808	39.2325	33.699	31.7958	30.1618	25.7547
-	ENSSSCG00000011673	34.1963	37.1733	54.2487	75.0971	63.8088	65.1503	69.8174	47.2362	50.2703	94.3637	65.4889	110.692	74.9042	79.0446
IFNGR2	ENSSSCG00000034378	47.2673	51.2225	45.5777	64.0255	53.1068	53.9475	45.6508	42.2894	38.5909	47.3945	50.3264	54.6626	44.5974	50.7177
-	ENSSSCG00000000145	81.218	84.1237	104.731	52.8609	103.58	100.124	13.5585	92.2902	102.624	47.9741	46.67	21.254	29.3255	27.4133
MRPS10	ENSSSCG00000001638	34.2362	34.118	37.7121	50.7155	40.5271	44.717	61.4525	35.6578	38.6448	62.0005	57.7966	71.5873	48.4037	87.7714
SERPINB2	ENSSSCG00000004890	21.7856	21.9312	14.161	20.1204	5.36568	5.94178	11.6068	11.7392	4.77297	1.9737	17.0217	3.59551	17.2028	5.93932
EIF2S1	ENSSSCG00000033295	33.371	33.3593	27.9301	39.4392	31.2221	32.0341	52.1206	32.4033	33.5631	51.8491	50.8052	67.3381	37.2362	62.0741
PRELP	ENSSSCG00000015271	28.5693	24.0752	118.976	41.0957	205.013	137.365	33.6892	107.716	116.09	49.9504	61.5592	42.1822	50.8014	36.0735
ACTR1A	ENSSSCG00000010585	51.3317	50.1047	45.6261	47.9634	45.1706	41.9221	36.2935	41.8261	42.8874	45.4685	37.1896	36.6467	30.398	37.0744
EIF4H	ENSSSCG00000025966	42.6167	44.3933	44.201	47.8825	41.608	42.4219	42.7457	47.6224	43.932	51.7251	50.4081	49.4994	49.0427	52.8156
CSRP2	ENSSSCG00000000951	51.0271	50.0742	49.7479	69.1442	65.2758	59.7492	56.7969	35.754	37.6025	63.249	42.6144	64.7984	59.2739	77.4657
MVB12A	ENSSSCG00000036568	38.993	39.024	38.4548	57.22	49.0125	41.4079	68.2536	47.4816	42.5578	79.4664	38.0849	76.4322	50.088	45.7329
GANAB	ENSSSCG00000030653	69.3611	63.6625	74.3274	37.6584	71.3009	57.3449	40.0658	65.1497	71.9017	35.4362	45.0171	33.4743	35.7805	39.1617
PPIB	ENSSSCG00000034137	36.6873	38.2387	35.9836	41.4368	37.9367	34.1809	81.7929	41.557	41.1345	72.3355	46.2064	73.9608	54.0181	56.3199
-	ENSSSCG00000038594	30.5279	26.8894	47.916	34.6778	47.6606	39.9252	57.6625	64.9867	60.3328	48.8113	54.2453	41.8617	40.3506	32.0063
PICALM	ENSSSCG00000014913	46.0061	47.436	48.6086	50.4972	51.786	58.3231	56.7428	46.0892	53.644	50.6159	62.2447	54.6942	68.8044	52.8832
UBXN6	ENSSSCG00000013510	47.9686	47.1096	42.0233	58.1961	42.7537	40.9336	46.2861	40.8424	35.6132	52.0342	34.3756	45.1287	45.7913	62.072
FHL3	ENSSSCG00000003644	67.8241	67.9127	42.9393	48.8036	39.8212	38.19	42.0692	47.1282	38.9138	50.3362	28.4668	37.5657	33.8264	41.7088
ZFP36L1	ENSSSCG00000028304	64.6068	65.5098	55.8311	48.1385	102.574	93.7984	20.4262	37.6732	60.5935	42.0009	26.7112	34.945	32.5977	39.3185
SF3B4	ENSSSCG00000006665	46.5565	47.5987	48.2648	57.1825	46.382	40.5681	38.9384	52.0536	46.2547	54.2545	43.6523	42.86	37.9048	32.614
-	ENSSSCG00000013613	42.103	41.315	34.7884	43.8478	30.7925	29.7626	56.8071	33.6674	26.066	56.5564	32.8089	46.3116	39.8024	57.4825
-	ENSSSCG00000045652	33.0339	38.1713	35.3283	36.6098	40.2817	32.852	56.717	40.2182	39.3563	80.0331	59.5021	77.6647	30.7402	64.1773
-	ENSSSCG00000022674	42.6368	41.279	43.2818	57.1689	47.4225	47.4695	46.9229	44.7001	43.9121	49.3387	47.5816	52.8935	43.406	47.3483
RRAGA	ENSSSCG00000005174	38.0933	40.6514	50.159	60.7953	50.823	48.0502	59.207	56.729	50.3989	62.2122	54.8727	65.2341	51.942	40.9748
MRPL45	ENSSSCG00000023263	29.8248	30.9851	27.5342	45.2515	36.7972	34.8909	54.0112	35.0767	32.6507	57.824	47.2069	68.0919	40.6162	72.4047
MKNK2	ENSSSCG00000013448	61.4451	63.0334	36.696	33.0546	34.9139	33.5635	18.1586	34.822	30.921	23.8639	20.5568	18.1089	19.6919	16.9407
-	ENSSSCG00000012257	21.7875	21.3848	23.6367	34.7544	37.4146	38.9328	66.4932	64.4317	59.6491	98.6661	68.9389	90.941	51.0861	61.0015
-	ENSSSCG00000032599	21.8136	14.8473	21.0331	31.0623	55.3098	15.1852	592.406	20.0874	18.9805	28.9558	27.5148	89.5556	60.3244	83.5718
GLRX3	ENSSSCG00000010759	34.2344	33.4101	34.2585	44.6031	33.4453	31.704	52.5127	35.9839	31.8158	62.9487	41.768	63.0193	41.1354	53.9398
LY96	ENSSSCG00000006175	29.4527	23.8886	26.5702	51.7163	37.2926	38.0752	110.954	34.6508	34.2472	77.3332	53.8818	90.85	63.4507	101.059
DPYSL3	ENSSSCG00000036549	79.5528	77.4205	56.0604	39.856	51.0992	43.2554	16.737	48.8375	44.3099	29.9793	34.6897	25.3385	28.2591	30.9205
WDR83OS	ENSSSCG00000013721	36.3859	32.7726	38.5532	50.8473	45.2233	38.4064	49.0139	43.0938	33.3234	65.873	39.1696	65.9018	39.8101	46.9706
TMEM50A	ENSSSCG00000024267	38.1259	34.5026	32.6286	55.2539	39.9418	41.7493	93.1978	35.9904	35.1627	62.2186	46.5227	81.1257	58.4762	77.2407
TBCB	ENSSSCG00000002926	47.0948	51.5821	38.8946	46.5417	36.1066	29.7769	38.2865	29.736	27.5628	47.9998	31.7635	44.424	42.229	29.0095
UQCRFS1	ENSSSCG00000027085	25.8191	23.5159	17.9603	22.9766	18.2483	19.7732	29.9737	21.2029	18.5975	31.1553	29.3645	36.9745	29.6639	27.802
NONO	ENSSSCG00000023245	46.0179	47.9017	40.2971	46.0195	41.0639	40.941	43.2092	42.3138	41.6156	51.3229	48.9045	55.4154	47.5643	48.646
ARL6IP5	ENSSSCG00000033154	41.1978	38.4128	42.0653	50.9945	49.1589	49.6216	53.4758	40.9692	38.8351	49.733	47.8555	52.8249	47.6377	50.0287
FABP5	ENSSSCG00000006153	32.8125	32.8641	29.4844	45.9449	26.7892	26.0437	44.3141	25.9663	22.2395	29.8304	32.8624	33.6364	29.8239	38.3695
ACADVL	ENSSSCG00000017947	25.116	22.9445	27.3096	30.7207	30.7481	29.2796	27.7803	32.8277	30.379	38.6642	25.4763	35.2868	22.8132	43.481
GOT1	ENSSSCG00000010537	15.0746	13.7661	12.6213	16.7098	12.226	14.1028	15.4532	14.9471	14.394	22.5821	13.6742	20.3041	12.7336	24.7271
-	ENSSSCG00000028414	30.5278	27.0959	24.3499	29.4054	24.7556	20.8747	50.2741	24.4057	19.8786	44.2256	35.6092	57.2111	45.8165	49.4602
ACAT1	ENSSSCG00000026153	33.1154	35.4388	25.4314	38.3832	29.9967	28.5281	39.8287	25.4942	29.7714	52.3359	40.0502	47.5013	53.9077	44.3586
NDUFV2	ENSSSCG00000038826	29.3785	28.3677	20.4206	30.5212	23.6676	25.9581	47.1592	21.6298	20.8452	38.9414	28.9794	45.5463	35.3609	58.8884
CCND1	ENSSSCG00000037900	41.9937	38.8278	66.0345	41.3314	77.8235	54.0298	35.6741	56.2394	57.6525	47.585	46.4688	47.2394	41.6175	49.0403
NIPSNAP2	ENSSSCG00000036659	29.6372	28.3901	23.1898	32.2622	26.181	26.7887	35.1069	23.5649	25.1021	33.7789	33.1404	32.4351	24.4124	31.2015
-	ENSSSCG00000028423	42.885	45.2379	37.8831	51.2706	40.8948	45.4753	45.7843	35.8056	41.0523	54.1747	48.8498	55.9906	59.9775	47.2329
MRC2	ENSSSCG00000017300	103.931	89.3078	100.97	31.4915	91.9842	63.9773	23.5627	58.891	61.9075	28.4391	28.4944	22.6032	34.4518	26.9605
PTBP1	ENSSSCG00000013421	52.6673	53.3834	55.2348	46.3317	49.2805	48.2149	33.4959	55.98	47.2905	42.667	43.1353	32.6917	35.922	30.3038
HINT1	ENSSSCG00000014264	35.8665	33.3208	20.8696	30.6982	23.984	21.657	69.9723	24.7037	24.1514	44.3608	36.3018	60.5917	40.5653	49.4612
MFGE8	ENSSSCG00000001834	63.3109	51.442	94.9524	66.5861	104.699	96.8182	41.521	52.5855	55.882	46.8857	33.2588	31.09	37.4967	26.1748
SWI5	ENSSSCG00000032748	50.8445	45.9219	36.6105	48.0031	44.2881	35.8946	66.0117	33.8901	29.5606	56.5831	32.8694	57.3076	60.9541	73.2123
DDX3X	ENSSSCG00000012252	30.8403	32.8412	43.5189	48.9126	41.7492	48.258	57.4566	49.8741	45.9358	40.1695	67.0623	49.8	59.4333	46.527
CHCHD5	ENSSSCG00000008094	36.5286	30.6339	27.4774	47.4467	36.0277	36.6881	49.8426	34.6108	28.3701	60.2289	36.0335	66.5438	71.3763	46.6375
HEBP1	ENSSSCG00000040275	29.459	32.1537	36.2578	53.5264	37.016	41.279	62.9353	43.8451	39.9362	83.3441	62.4842	66.7667	44.699	78.8308
SLC25A39	ENSSSCG00000030167	44.6869	44.7875	41.7606	48.5463	36.1475	31.2048	39.8213	43.3384	39.2282	52.9256	29.5772	35.9558	36.5593	36.4235
PLAT	ENSSSCG00000007032	136.439	129.177	59.3625	43.8733	38.7125	33.9194	26.5941	28.4794	28.096	20.8079	27.6608	20.4101	23.4724	17.9825
YARS1	ENSSSCG00000030369	44.5403	47.2197	35.5681	40.3376	34.8262	34.64	39.6771	37.3583	40.4132	52.0929	37.2307	41.389	33.9835	31.1668
OAZ2	ENSSSCG00000004550	44.7286	47.3912	42.2209	42.193	40.1136	39.0554	42.813	32.4861	35.5808	40.6209	36.4825	42.7149	47.6958	48.5308
-	ENSSSCG00000034387	37.9073	34.6457	34.041	46.9507	34.6617	31.0323	44.3479	34.8675	27.9031	57.9609	26.0134	51.3348	48.0817	56.4494
-	ENSSSCG00000033457	3.43438	3.59067	9.57065	13.439	9.77309	12.6967	97.5388	56.3706	63.0042	124.62	78.8732	140.999	76.4421	87.4682
GASK1B	ENSSSCG00000008873	54.4677	62.5068	90.1032	81.297	67.0563	61.4952	51.2669	44.0668	38.6013	33.7125	54.8315	43.5439	48.8377	39.914
-	ENSSSCG00000016982	34.6319	36.2144	17.8388	22.693	18.3856	18.6564	26.3909	20.7499	17.2801	29.2192	23.678	31.3068	17.4483	27.2538
-	ENSSSCG00000003348	40.7077	36.2464	46.5207	60.7142	49.206	48.4157	52.0757	43.7594	42.7144	62.5381	37.9611	64.26	44.5213	71.0795
IL6ST	ENSSSCG00000016916	40.7738	43.3061	62.8732	42.1367	66.4206	67.4151	72.8582	48.3064	57.0342	34.9497	76.3533	55.1988	96.4923	64.6004
NID2	ENSSSCG00000005030	94.4617	87.2815	74.3796	33.3363	80.6183	65.4207	25.2968	47.5712	51.6124	19.7392	32.5931	23.654	40.5402	29.5652
-	ENSSSCG00000003554	74.357	68.7405	68.9195	38.1824	65.8784	53.8187	33.5217	64.5664	57.9913	39.1906	33.0431	24.3391	27.7714	22.5188
ALYREF	ENSSSCG00000032655	33.3787	36.8384	25.81	35.1142	26.9894	23.0727	31.2905	30.8658	23.8214	39.1968	35.1364	39.4788	30.715	35.4004
TIMP3	ENSSSCG00000031866	50.3438	51.0504	113.474	66.0096	114.318	106.2	41.6206	57.0754	85.5658	51.5808	55.1896	50.7399	63.0054	51.0343
SEC61A1	ENSSSCG00000011621	54.786	49.9865	45.5942	38.3746	47.3857	43.8355	33.9328	49.8781	46.0131	38.3546	40.5866	33.1896	41.5013	37.979
GPC1	ENSSSCG00000016364	79.2495	72.0402	48.5655	25.4678	46.416	36.4882	30.5289	48.6495	46.7295	26.5832	27.2571	23.3248	23.5637	33.4037
SFT2D1	ENSSSCG00000004020	37.5366	39.9434	43.783	51.141	39.0769	41.3959	67.3893	39.0979	42.0574	66.285	46.0382	79.4962	40.3809	62.7879
-	ENSSSCG00000036907	47.3537	39.0297	93.194	158.947	135.895	129.507	53.5071	29.4042	25.1109	30.4501	37.2759	61.9908	36.8977	85.2545
BTBD6	ENSSSCG00000035555	44.7539	50.5462	54.7144	67.2772	61.6039	57.3943	41.5419	54.2255	48.9824	64.5072	35.7402	49.6992	34.8641	55.5932
TMEM259	ENSSSCG00000027779	54.8548	52.7531	53.2312	41.7597	50.2814	47.0191	31.3607	46.631	42.767	38.6718	28.1231	29.5174	33.6039	34.5405
UBE2V1	ENSSSCG00000030632	44.7321	45.5982	40.2021	44.884	38.7784	40.2755	46.51	40.613	41.9479	45.8614	44.1683	47.7533	48.7913	36.0806
PPP1CC	ENSSSCG00000009828	39.3164	41.3657	27.1606	38.3811	32.1685	36.557	46.1406	30.2999	35.505	45.5454	44.0428	50.5563	49.228	43.0501
COL18A1	ENSSSCG00000038089	53.0356	47.6398	90.16	32.9475	72.0906	55.2033	27.8437	76.0673	59.5408	33.0246	36.3911	27.9987	40.2102	32.468
BTBD2	ENSSSCG00000013444	58.359	49.8533	52.0304	56.8423	52.0851	51.2852	35.4249	48.9616	45.8579	56.6744	31.2021	39.0703	35.8717	49.2358
RYK	ENSSSCG00000011642	37.6325	43.983	52.9453	64.0125	47.2084	50.5224	62.0725	43.1588	45.5552	62.4598	57.6785	60.2202	72.2454	90.7315
MTPN	ENSSSCG00000039290	38.3847	45.201	53.1142	59.297	55.4988	63.011	57.947	57.2236	63.3811	61.6417	64.6612	61.1202	63.0272	47.4934
PSMD2	ENSSSCG00000046387	41.7075	42.9932	38.5248	43.5669	37.2599	36.5736	33.1017	38.3753	36.9238	51.9996	36.5458	43.9115	30.7279	35.1291
UGDH	ENSSSCG00000030150	38.5753	43.2123	29.0799	27.9897	31.8301	31.8121	53.4443	42.643	48.3598	47.6256	62.9647	58.4183	54.0944	45.2715
EIF3M	ENSSSCG00000013315	34.0377	35.616	23.8555	37.3902	26.0868	27.8963	49.408	27.3451	30.4193	54.4257	46.7733	66.5551	48.4302	52.412
-	ENSSSCG00000048201	52.7144	41.1668	27.5231	32.2025	27.9489	38.0134	50.6911	37.6716	22.8769	57.2951	37.5945	25.4116	93.2216	35.4859
RAP2B	ENSSSCG00000038366	57.6753	56.176	89.4898	90.939	38.1667	44.2806	62.2533	76.0811	30.5467	26.0602	71.7156	42.6404	69.5666	0
CERCAM	ENSSSCG00000005650	45.2596	40.5759	82.4521	53.3198	87.974	76.5703	54.8057	75.3569	75.3502	64.6188	41.4935	58.7948	35.9941	50.6622
DDX17	ENSSSCG00000000104	49.6511	44.4014	58.5874	53.1901	58.1963	60.0833	44.7353	57.6045	61.7974	38.639	58.7552	39.1336	52.1513	45.0925
NDUFA1	ENSSSCG00000023277	26.1268	18.5041	13.9234	20.2667	19.7431	18.0028	46.3494	16.9143	14.2619	27.9253	27.2974	37.5544	17.6809	51.831
DYNC1I2	ENSSSCG00000015948	43.6199	44.1766	39.2083	50.4373	43.8567	47.3288	55.9807	36.7768	43.3684	54.5339	54.9007	61.7608	58.5681	46.1788
KHDRBS1	ENSSSCG00000023122	42.7621	45.4507	42.2524	44.5997	40.9561	37.5282	46.5752	45.1717	42.8398	42.1272	39.2944	41.2088	47.6976	45.3092
B2M	ENSSSCG00000004687	37.5052	31.8595	23.4203	38.762	30.7025	29.981	68.7783	28.1837	27.2335	40.6959	42.5973	52.3633	49.5124	41.7215
CTNNB1	ENSSSCG00000011274	55.4547	58.6306	48.2706	52.2376	45.4909	48.7565	43.0237	41.6656	44.2882	43.3594	46.2091	46.4257	50.1696	41.6942
PRSS23	ENSSSCG00000014921	30.43	29.8359	61.8576	47.6893	72.0051	72.2242	50.0806	48.5808	56.7727	59.837	46.8338	64.6779	57.1844	72.4855
IER5	ENSSSCG00000015541	52.3664	54.0387	74.8225	58.1197	30.3163	31.551	43.8514	60.2393	29.1659	26.6295	49.3948	29.4684	45.9761	47.7611
RNASEK	ENSSSCG00000017929	46.1125	46.6082	52.7667	55.6067	49.5781	50.4768	36.6424	43.8573	49.5302	57.051	25.932	34.4905	37.7494	49.6571
DDX21	ENSSSCG00000010247	27.1479	30.5875	32.0874	29.8845	32.7747	34.1102	45.902	46.5871	45.9629	40.917	56.7279	41.1444	53.1002	33.831
RAB11B	ENSSSCG00000013600	47.8682	49.4273	50.1774	56.9186	49.0921	42.6914	33.2144	48.381	38.9562	43.5182	24.8428	34.8068	30.6458	23.9635
PHF23	ENSSSCG00000017937	39.4424	39.15	41.3311	52.6424	40.373	39.7727	46.8098	33.095	35.9319	50.1038	39.2441	54.9702	29.7689	53.4592
-	ENSSSCG00000013391	32.9875	32.1252	22.1385	37.0512	25.6402	26.4223	54.5824	25.4679	25.3606	52.2058	41.8516	65.2746	47.4115	56.9171
PDLIM1	ENSSSCG00000010493	38.9562	38.6041	30.2241	38.612	31.9295	29.3692	37.3361	38.1822	35.1125	43.8933	33.0026	41.8659	27.234	34.5017
ATP2A2	ENSSSCG00000034386	20.1431	18.5076	19.3376	10.7318	19.4097	17.4875	11.0087	18.591	19.1293	8.26444	17.0716	11.5212	17.0624	19.8189
NDUFS4	ENSSSCG00000016893	23.3059	19.6434	17.4279	24.4132	19.7662	20.2039	37.7002	18.2783	18.4885	38.845	31.7557	53.3798	42.0083	38.2679
EHD2	ENSSSCG00000023371	62.6754	58.4238	67.5858	51.7266	67.0328	61.9578	33.5281	72.4986	76.3768	55.2878	40.9285	34.2031	28.8455	18.8718
-	ENSSSCG00000028850	36.8076	14.3119	14.4581	36.4653	38.0327	33.362	111.142	32.2175	14.5881	30.6885	40.552	57.9687	54.9091	51.2821
LTBP1	ENSSSCG00000008510	60.5887	51.8074	83.7215	32.4724	87.5861	69.7688	41.8534	55.7338	64.4933	32.2523	51.2434	37.3854	48.8105	44.5379
CREB3L1	ENSSSCG00000013263	74.7653	66.5757	54.1981	34.6665	60.7896	48.7725	38.7715	67.4556	71.209	38.3713	30.2926	21.4752	28.8632	9.0372
CCT4	ENSSSCG00000008377	31.1139	30.6558	26.3279	36.5384	32.1669	31.8769	53.3507	33.8987	32.8376	49.2629	42.3499	54.8478	52.0604	47.2033
-	ENSSSCG00000026043	1.47505	1.58417	42.9529	41.1557	40.3145	41.1735	52.6934	87.9653	80.7374	115.498	59.1422	75.7808	61.0443	75.3643
RHOB	ENSSSCG00000043781	51.0077	53.1738	41.9522	34.9775	31.886	32.836	27.3641	35.7908	41.7971	27.1387	27.2495	27.9664	25.1934	27.4854
FKBP5	ENSSSCG00000001549	22.8733	23.0128	19.8577	17.4059	31.1279	32.6402	74.6267	79.9454	89.4075	73.1122	79.7922	64.4671	55.5566	51.8551
TGFB1I1	ENSSSCG00000035952	56.1607	59.8408	48.7927	54.9745	50.7052	45.6403	33.8286	47.6056	39.3295	49.1371	33.0884	35.4872	23.16	25.505
AKR1B1	ENSSSCG00000040608	31.8036	35.4011	27.6443	39.2087	28.0756	28.8474	30.9372	30.0864	26.6671	41.514	30.138	32.3874	30.0016	24.1854
COPA	ENSSSCG00000006386	49.6577	50.698	50.6794	47.1624	55.6108	55.05	36.0919	50.9035	55.5677	53.338	50.478	46.5672	42.0787	39.7423
SBDS	ENSSSCG00000007732	35.8674	33.6901	28.336	32.2818	28.862	32.945	47.2483	28.7986	33.0293	34.9864	42.4818	38.967	38.4315	38.2887
QRICH1	ENSSSCG00000011373	34.0291	34.5491	36.7585	44.1808	41.4792	38.8274	52.78	46.5407	46.3349	69.0577	47.9449	67.1661	42.8538	48.3429
-	ENSSSCG00000039295	23.4259	24.4221	30.0618	38.2229	33.0233	31.9525	71.6779	34.2985	36.4023	58.7352	40.3413	80.6164	31.4527	85.9129
CCNYL1	ENSSSCG00000024696	36.8878	40.3622	51.8224	47.5469	40.0794	40.3542	54.7014	44.0398	40.3437	38.8233	53.7082	42.7682	42.7678	23.7237
KIF1C	ENSSSCG00000017900	35.8426	32.8937	40.9771	30.6812	34.8561	30.6643	22.6769	41.576	36.6872	28.5578	25.548	22.5915	25.6187	20.7934
-	ENSSSCG00000000207	20.7712	15.127	28.9934	40.9531	36.3219	38.7198	63.0073	32.489	30.7862	69.6612	49.1543	80.7581	31.4183	103.73
-	ENSSSCG00000040571	38.5735	29.327	24.7851	30.8394	24.2343	26.8882	56.0996	31.6377	27.0148	42.8336	44.4113	61.9933	28.227	21.996
-	ENSSSCG00000013380	29.0516	28.3118	29.5866	29.9987	32.6716	30.2638	66.6873	33.3856	39.4805	50.4359	56.4582	65.3837	53.7778	48.9028
-	ENSSSCG00000024144	24.9752	21.6143	17.2091	27.8119	19.6203	16.9193	27.4962	19.6293	15.843	29.0901	16.8245	29.8998	24.3312	39.0758
FURIN	ENSSSCG00000001817	77.4328	73.1206	73.7415	43.4643	60.5081	49.4469	25.7635	45.7502	38.6994	24.4544	28.5002	21.4563	34.7884	18.8948
PIGC	ENSSSCG00000015486	34.5097	39.1678	36.6601	49.1683	37.6443	36.9006	49.5716	40.0561	35.2592	49.6568	46.3604	49.2562	37.5611	39.4264
TGFB1	ENSSSCG00000003017	126.482	114.026	57.7444	42.8698	49.7786	41.3217	19.7551	35.8124	35.0504	22.5196	22.6138	22.6394	29.5836	17.9291
TAX1BP1	ENSSSCG00000016692	29.282	30.9664	39.3153	46.1636	41.461	47.7942	57.4428	41.4279	50.063	59.853	64.2519	64.9443	71.9003	60.7057
PECAM1	ENSSSCG00000017277	87.8428	76.9516	51.4875	56.2652	41.1382	46.5902	30.363	27.0622	30.1999	18.6885	27.6914	23.4374	32.6602	31.9993
ATP6V1B2	ENSSSCG00000028694	33.6777	32.6218	38.0054	47.4743	42.5361	45.0811	48.8398	48.5485	50.0858	65.3082	48.8843	69.5787	50.5042	60.02
HMGN3	ENSSSCG00000004470	28.5093	25.6392	28.5974	37.1252	28.2486	31.9012	58.0169	31.7303	30.3448	54.8183	42.9907	69.8138	56.4784	56.7426
SFPQ	ENSSSCG00000035690	39.5284	46.7155	35.3462	33.7417	20.0596	22.4817	28.5003	44.2498	25.3449	25.4441	41.1001	26.2704	29.8733	18.8947
COPS8	ENSSSCG00000016323	37.3589	34.1028	40.2839	46.1243	36.6388	38.4233	48.4944	39.9229	34.4419	49.7371	40.0009	54.3642	33.0184	77.9903
-	ENSSSCG00000001769	33.7622	35.8341	33.4699	50.3322	35.4851	39.4339	53.6882	30.904	33.3735	49.85	44.858	60.9439	55.7021	53.7115
VAPB	ENSSSCG00000007514	41.9201	41.4471	40.8789	41.939	39.8495	42.0636	37.2235	38.1078	39.9092	42.0226	31.1398	37.0137	31.8112	39.1291
UBE2C	ENSSSCG00000007423	47.448	58.7266	15.8721	24.0471	11.6901	10.8439	28.3246	31.7874	21.6151	45.137	30.1206	40.1635	12.771	18.671
-	ENSSSCG00000024917	6.99695	9.32185	77.5043	66.5727	84.6736	71.9505	66.8095	94.935	82.0926	75.2212	57.0513	82.4066	56.3838	80.8108
TBC1D20	ENSSSCG00000036081	31.2155	29.1075	42.2226	40.4069	45.8901	44.287	60.8264	65.1575	61.8711	52.7529	59.1745	44.4104	47.1214	52.8779
PPP1R15A	ENSSSCG00000003155	33.9253	28.0204	34.8075	26.0684	20.6094	20.3944	16.0759	20.8506	14.453	11.6913	15.364	8.21527	18.7932	10.0913
LRPAP1	ENSSSCG00000008701	35.5266	32.7476	48.5192	50.1478	54.6354	49.228	54.2338	55.3823	49.8034	56.6827	42.4056	56.9443	55.2209	34.7793
RSU1	ENSSSCG00000011042	43.3041	46.4987	44.179	55.0464	48.7257	45.4997	43.7495	39.2088	42.3545	55.8861	44.4275	55.5703	46.1613	44.6136
GPX1	ENSSSCG00000033727	17.9668	16.2089	24.7485	46.0008	38.248	40.0024	87.3798	69.2203	70.1572	101.977	55.6773	82.4244	55.8752	73.7854
TMEM205	ENSSSCG00000013622	28.3273	25.0008	48.3882	62.1128	55.4172	50.5762	60.0158	51.4146	46.7242	79.496	34.7964	70.8532	45.6351	77.2653
EIF2A	ENSSSCG00000011710	31.9336	30.2188	32.7082	44.7551	37.0764	44.3439	49.1907	38.927	42.1278	65.9409	47.1593	72.0599	50.8178	69.6916
PTPA	ENSSSCG00000005672	49.7776	47.5884	51.149	54.6811	50.9689	42.6195	48.5982	44.5166	41.047	48.1303	31.7576	40.4407	42.8448	50.8737
ATP5ME	ENSSSCG00000023903	19.5112	10.1691	13.9919	19.2961	22.4249	16.1876	50.4578	19.9873	10.6898	24.7122	21.2397	28.2397	18.7976	28.4001
PDCD5	ENSSSCG00000002860	34.4605	28.9317	20.7108	28.4638	25.9619	20.9273	42.3939	24.493	21.8916	39.097	30.0207	50.0265	36.8119	31.211
RARS1	ENSSSCG00000017015	31.0938	34.7753	32.2194	39.1291	31.743	33.3611	44.5248	34.8406	38.9466	52.1529	49.4168	67.1628	46.8048	66.6279
BLVRB	ENSSSCG00000021067	31.3611	29.4888	23.5687	40.3547	34.4621	30.0342	49.2113	27.04	24.3367	49.4921	25.9805	49.7739	20.7692	72.9491
ECHS1	ENSSSCG00000038086	26.9037	26.022	28.2125	39.3313	29.0293	27.8242	45.8904	32.532	25.8154	50.5024	33.8208	44.2115	33.8155	35.7903
OCEL1	ENSSSCG00000013874	29.5452	26.488	41.2334	57.1937	61.4265	52.5435	57.9149	59.0335	58.8801	83.6672	44.1239	81.8325	34.5269	57.9936
PRDX4	ENSSSCG00000012171	29.1298	29.5783	34.8573	47.1107	41.0419	38.841	76.337	41.3372	40.8267	71.7081	49.4586	79.2769	48.2084	58.5684
TMEM141	ENSSSCG00000005842	23.4438	21.3316	38.7188	52.1733	46.8226	38.9335	67.8949	43.6901	33.809	60.4598	41.8941	55.8688	51.4928	84.6313
VASP	ENSSSCG00000036317	60.9611	63.6275	44.9007	45.7232	41.6182	40.4039	32.5562	42.6756	37.9017	35.4807	32.0629	28.4137	29.2978	28.8019
ACADM	ENSSSCG00000003776	25.4723	26.8078	18.1568	23.8793	20.9787	21.8904	33.5538	19.267	21.6982	35.6531	32.8344	40.5565	32.5484	24.1068
WDR45	ENSSSCG00000012290	39.0863	36.8001	41.5267	50.1763	47.7546	43.0242	37.9439	43.743	38.5952	55.8625	31.2751	45.5493	34.8348	34.3768
-	ENSSSCG00000007554	12.8182	12.0376	25.9263	24.4598	14.001	13.9019	20.9915	18.5304	9.73532	10.3973	11.1729	11.8431	11.9483	4.093
LAPTM5	ENSSSCG00000025034	55.6491	55.7503	51.5086	65.7813	47.6697	55.6645	35.8863	42.9734	44.5183	44.9609	33.9913	38.0616	46.7991	36.0053
DCXR	ENSSSCG00000039873	27.3753	25.9447	34.025	49.2359	39.8916	34.8962	60.4316	41.1049	29.7832	58.544	31.0225	53.9901	57.407	42.7686
CSNK1A1	ENSSSCG00000014435	41.7064	42.4867	41.1987	47.4211	39.9313	41.6438	42.1126	37.5646	36.7742	38.996	46.1848	45.9606	53.9954	45.3005
TSPAN12	ENSSSCG00000016620	32.5932	29.8548	12.0134	15.8424	11.7385	11.3801	15.1618	8.68154	8.23578	9.47542	13.0858	12.9618	12.2406	7.95012
HSPB8	ENSSSCG00000009844	29.0186	21.3614	2.97491	2.39537	2.47044	3.79956	2.37679	3.43941	1.09138	1.75228	4.17717	0.655458	3.08325	0.0411706
SMIM4	ENSSSCG00000034529	24.5225	20.3216	28.1482	31.6987	31.0506	28.5528	100.612	36.1411	31.2451	67.3374	40.3838	81.446	38.4988	74.7645
DBNL	ENSSSCG00000016721	52.2419	54.3181	48.7924	49.7051	43.7251	38.5922	35.241	44.9209	38.5499	49.4621	31.0714	31.1772	28.1939	25.8909
GPS1	ENSSSCG00000033689	41.6011	39.6639	41.1918	47.7366	39.3795	37.1289	33.6441	44.3919	39.0601	54.0455	30.167	45.9801	42.0335	50.0223
SCPEP1	ENSSSCG00000017617	39.9359	41.5953	46.721	55.3572	50.1676	56.8175	65.4962	50.0351	54.3424	58.9603	52.3047	61.1208	44.9513	57.6559
SEC31A	ENSSSCG00000009244	45.3895	45.1039	54.9407	49.7052	54.8999	52.7729	33.0458	57.6135	56.155	53.3446	42.7698	43.3936	45.0819	41.1878
BAG1	ENSSSCG00000010996	35.68	34.3872	29.0736	38.1237	27.9972	31.5314	38.7712	31.6153	28.0942	41.4549	28.5873	41.1725	25.1005	38.3927
GFUS	ENSSSCG00000031698	34.5148	30.9522	30.6752	38.5846	32.4555	29.3965	44.158	38.7007	33.2854	57.8168	28.7855	48.3737	44.3591	53.9511
ASNS	ENSSSCG00000015340	52.1106	51.5003	27.1612	34.7421	28.2663	28.3668	35.3811	31.4922	36.9863	53.8865	34.3856	48.4435	30.0702	57.0418
-	ENSSSCG00000041875	24.778	16.688	18.9031	21.8204	19.9209	12.4469	614.145	27.7329	17.0316	27.443	20.0649	31.3277	54.9097	58.4407
FMO1	ENSSSCG00000015268	0.538147	0.629116	2.16744	2.72583	4.20743	5.2026	126.806	92.6691	99.6865	149.057	104.298	124.547	84.1784	70.303
DAZAP1	ENSSSCG00000013427	35.1782	33.5843	36.4384	43.7097	32.0073	29.6008	43.6631	37.167	29.1463	37.0714	37.9645	36.3083	33.6126	41.5272
UBXN4	ENSSSCG00000015690	35.8218	37.5934	31.5845	39.2428	32.6981	36.45	37.9138	30.702	33.555	43.3833	45.7268	47.7529	48.7075	41.4686
COL15A1	ENSSSCG00000005380	105.281	105.171	61.1648	26.0308	48.8922	42.1805	23.4484	43.0456	49.319	23.9915	29.2338	22.0536	24.3317	31.7256
NME1	ENSSSCG00000038348	28.989	28.531	22.1104	27.3863	23.7389	20.218	41.4231	27.6997	23.6607	46.0415	29.9581	46.4735	40.8827	49.7533
PDCD6	ENSSSCG00000032090	36.0661	33.8569	32.6543	44.6592	32.4982	30.1821	56.219	33.3333	26.9222	42.0185	36.4488	50.6784	49.1174	49.6097
-	ENSSSCG00000037251	19.1405	17.3331	19.4396	25.9768	22.8973	19.8763	53.5305	18.9786	18.5107	37.3358	23.7836	61.468	7.38111	81.4612
EIF3J	ENSSSCG00000004691	28.3417	28.9068	19.8455	26.7291	19.164	24.8095	36.455	23.5273	24.7641	33.4193	38.4038	44.1535	40.8497	40.1309
RNF5	ENSSSCG00000001436	30.7565	33.1061	33.1607	41.4347	32.1726	30.8465	36.9813	34.8627	31.957	46.289	30.639	44.4689	29.7949	24.2208
PTGIS	ENSSSCG00000007463	35.9718	31.1016	84.7896	52.5791	81.3809	80.6827	46.9971	67.4495	71.1328	48.4248	53.6873	43.3121	56.1834	39.6632
LAP3	ENSSSCG00000023604	35.5607	35.5525	29.8563	42.0294	33.5096	32.8325	38.2552	37.586	35.5609	49.9902	39.8409	50.7283	33.5013	37.3629
MAFF	ENSSSCG00000030165	34.898	31.0819	33.8792	36.8451	40.748	40.7463	19.1076	24.4031	30.0103	26.6793	19.5801	22.8153	25.6485	15.9172
MYC	ENSSSCG00000005965	36.9497	38.1342	57.3878	50.7281	35.7339	35.2046	38.0991	60.9199	49.1069	41.2256	49.284	36.5483	53.546	30.1339
PLAU	ENSSSCG00000010312	90.4975	83.0302	34.4545	29.881	30.3359	28.2302	26.3232	23.3737	25.4409	16.6496	22.7557	18.8334	19.6413	20.9678
PLGRKT	ENSSSCG00000005212	35.2276	25.3716	16.9306	29.773	18.3472	19.0917	50.9364	15.959	15.9231	34.0849	27.7512	44.7552	25.6801	30.1571
MRPS34	ENSSSCG00000008016	30.5772	29.7747	32.8332	41.4782	34.6727	30.8056	47.3613	37.1514	26.922	48.8445	33.0927	46.524	28.8752	48.1975
TIMM10	ENSSSCG00000039659	24.1139	25.059	21.8436	30.8119	25.0074	25.4147	61.3935	25.1466	24.556	44.608	30.226	47.429	28.4158	32.6812
FIBP	ENSSSCG00000012969	32.6134	31.1593	35.088	47.8697	39.1336	33.1459	50.9698	36.5642	33.6205	54.0807	33.3147	46.9208	23.5723	47.8024
TNFRSF1A	ENSSSCG00000000708	67.2591	62.3653	46.8566	39.5692	47.4477	44.8533	38.365	38.0593	38.2199	28.5818	34.7698	23.4829	33.3275	27.953
PXDN	ENSSSCG00000029570	106.34	90.9849	59.0281	24.4143	55.1499	42.2837	13.8733	41.2061	39.752	17.1269	20.3959	14.4132	21.7525	19.1921
LYPLA1	ENSSSCG00000006260	32.6898	33.3643	21.2402	30.2887	22.7474	26.5227	36.997	28.265	29.6904	38.0094	36.9059	35.1207	43.9227	42.0945
-	ENSSSCG00000004656	38.7266	45.4733	42.4052	59.8625	34.3169	36.9784	54.0888	41.6291	32.6134	48.9498	45.133	54.6898	28.4898	119.121
TOMM40	ENSSSCG00000003089	26.5582	27.5777	25.9921	25.8775	26.1375	22.6518	28.7945	32.8134	26.8514	40.6991	25.29	31.0596	34.6414	37.9806
-	ENSSSCG00000028679	35.5207	35.2932	35.7151	41.2924	35.8912	39.6513	35.3716	35.6328	33.784	32.301	38.9965	39.6502	42.0001	30.0203
DCTPP1	ENSSSCG00000007795	29.5823	32.0428	35.2141	39.9882	27.1683	26.9842	52.0812	38.3207	31.6406	37.5276	39.2125	43.8749	46.1573	51.4906
MRPL2	ENSSSCG00000001658	33.2566	31.6274	26.6372	34.0601	33.7585	29.3091	50.6865	32.611	27.3446	51.5145	33.4865	48.6385	39.0714	31.0415
PSMD11	ENSSSCG00000017731	37.6433	36.1645	36.9915	35.9943	35.9338	36.6531	15.5609	36.2926	37.8502	37.4451	33.4293	28.592	44.1118	27.5327
RTN4	ENSSSCG00000032007	49.6496	50.0544	46.0753	45.8691	44.1286	42.9534	35.6774	40.9965	36.9679	33.4577	37.9561	32.2846	43.3568	31.6683
RNF114	ENSSSCG00000036129	39.3505	40.1138	35.9374	44.8028	39.8836	39.5544	42.1999	42.454	42.2864	47.2428	45.6183	41.0788	34.0646	35.241
BTG3	ENSSSCG00000012014	27.6597	28.5472	38.2379	49.835	42.3392	43.6008	60.0133	32.7769	34.6796	54.4544	48.8417	73.5526	59.1324	47.6299
RAMP2	ENSSSCG00000017389	69.1038	60.9648	26.676	33.9325	25.4527	26.5601	21.3271	14.8384	15.7766	17.4015	17.7361	16.3415	17.9572	18.8928
UGP2	ENSSSCG00000008368	22.2276	20.6277	26.556	38.5127	45.4849	50.5	63.6927	43.7429	53.801	64.2413	62.3715	74.2887	58.3008	62.3336
RNF126	ENSSSCG00000039551	36.9775	35.4652	30.9528	32.0865	32.6647	29.605	30.1947	35.1025	28.9741	32.5403	25.402	36.5138	44.2311	13.0436
-	ENSSSCG00000036052	1.38014	0.780128	0.0698538	0.159871	0	0.279258	0.0660111	0.11786	0.121805	0.183485	1.22278	3.12262	0.822216	19.602
POLR2G	ENSSSCG00000025571	32.6849	31.9127	27.7092	38.284	30.4037	29.696	50.8674	29.7469	27.3269	50.4615	32.4494	54.8169	40.1293	51.0423
SLIRP	ENSSSCG00000028167	26.5712	21.3584	17.6613	26.5938	21.3565	20.58	62.0937	19.3542	14.3395	30.3481	35.7427	50.9046	46.2666	55.7094
ETFA	ENSSSCG00000001862	25.0811	23.4158	19.9993	28.6147	21.6497	22.6252	43.4491	22.6171	24.3052	39.0355	30.6161	47.5043	30.7854	51.762
ABRACL	ENSSSCG00000004145	31.4561	32.2942	20.4225	36.407	20.1999	22.5947	61.359	22.5983	24.2275	47.7103	49.7907	60.3723	37.6976	34.2962
CLPTM1L	ENSSSCG00000017119	44.8261	47.371	37.7501	41.3607	40.4911	36.6717	41.8982	46.0104	35.7053	37.0094	30.4777	32.463	34.8947	46.5933
SDCBP	ENSSSCG00000006237	39.3415	46.2072	46.8205	64.3746	40.8644	49.8639	50.2378	38.6335	40.2043	51.5838	43.186	59.1563	44.8826	47.4454
ARPC5L	ENSSSCG00000005596	33.7018	33.489	24.5268	28.605	20.5106	19.7447	33.6552	19.8976	18.6053	34.301	26.9158	30.509	32.067	35.3429
YIF1A	ENSSSCG00000012953	38.422	33.9842	38.0621	48.179	42.9768	38.794	49.3797	43.2376	37.8482	61.1923	33.0913	55.6633	48.3072	40.6329
PPP2CA	ENSSSCG00000014298	31.8341	30.7227	35.1701	43.5842	31.2245	34.2032	48.6725	34.6668	31.7992	40.9437	45.3041	51.6618	55.5984	44.2338
-	ENSSSCG00000046182	43.5336	38.0332	38.6531	29.8356	37.5293	32.4852	20.9933	45.669	37.3995	36.4085	23.5455	26.4277	26.6823	3.71636
ATP6AP1	ENSSSCG00000037310	43.6039	38.7528	51.924	42.3667	55.2002	53.0759	30.7237	49.3511	48.2175	28.841	30.1378	22.2233	27.2713	51.5993
ZFAND6	ENSSSCG00000001779	33.6632	34.19	29.5152	40.4044	31.014	35.7973	45.5464	29.7007	28.236	41.1924	33.6788	48.5769	48.7588	48.6759
GRB2	ENSSSCG00000017206	35.2008	33.0281	36.5734	43.1257	36.9744	35.2554	46.5292	39.1543	37.008	43.227	41.4995	45.7269	32.2197	62.1316
CAPNS1	ENSSSCG00000030149	43.1835	45.9031	38.899	45.0945	38.0388	35.348	31.2227	36.019	36.0974	50.2735	34.2286	37.1539	33.8418	43.5035
MAPKAPK2	ENSSSCG00000015650	36.9769	33.6322	43.7544	40.586	40.472	36.7557	35.734	45.6379	42.7672	44.997	32.0321	39.595	35.123	24.8914
SF3B1	ENSSSCG00000016075	38.112	39.7049	43.8419	35.0937	44.893	49.7124	40.284	38.0552	48.0727	39.2943	54.6345	46.2374	42.4606	47.4394
IL1R1	ENSSSCG00000008162	32.8719	32.7145	37.5392	28.8111	38.026	36.2681	60.8771	61.6875	57.7254	41.9958	66.7926	41.2753	52.8839	35.4837
PDGFRA	ENSSSCG00000008841	75.2287	71.9549	59.7239	26.6938	67.2368	60.6307	31.5179	41.5601	43.2495	21.5635	42.1753	21.4707	43.2483	22.9331
NSMF	ENSSSCG00000037880	41.2682	37.0212	47.4089	42.6527	42.7891	37.2146	38.5272	53.3448	42.0589	46.4322	27.9393	35.2401	42.0381	33.8702
MAZ	ENSSSCG00000025321	56.2485	53.9942	38.0359	34.1341	38.5881	33.9359	23.2995	38.9336	32.2119	35.0534	23.0406	24.2539	18.3292	20.4755
SELENOT	ENSSSCG00000036920	28.1165	30.3467	23.1337	36.053	27.595	32.3105	55.1567	28.6323	30.8126	48.3489	40.9615	55.2902	53.9298	52.7853
PLOD3	ENSSSCG00000028879	62.5994	54.1119	50.6662	30.7794	61.4949	52.9553	30.1529	51.5819	55.9494	47.0895	30.0869	29.1424	27.4941	33.5978
ARL8B	ENSSSCG00000011535	29.7597	30.7482	31.7083	43.5151	35.4947	38.5116	46.4789	37.0944	37.8384	46.6828	44.6402	48.9548	46.3883	41.9498
IMP3	ENSSSCG00000042572	23.5545	24.2156	28.5226	38.7341	24.4968	25.4731	55.6949	39.7456	27.1152	42.2596	36.7121	37.5423	51.0441	62.4725
TKT	ENSSSCG00000021408	35.0848	35.1462	38.6137	43.2504	41.4657	43.2273	31.3554	40.6444	42.9429	60.6276	32.6175	44.6782	28.2847	37.9089
CDV3	ENSSSCG00000027294	33.837	37.7106	34.3629	33.9274	29.9045	30.3592	35.7844	37.9447	33.7976	29.3486	39.9953	34.7745	40.0239	34.6676
SCAMP3	ENSSSCG00000006520	37.8357	37.1577	40.7087	43.6457	44.2894	42.504	37.0226	41.7835	40.5106	40.5176	37.6184	35.5859	20.1845	50.6367
-	ENSSSCG00000024911	0	0	0	0	0	0	0	0	0.29026	0.680154	1.19983	0.209189	0	0
STIP1	ENSSSCG00000021620	31.5653	31.5043	30.5266	36.7517	31.6713	32.0118	29.6016	33.7541	34.6452	48.6925	33.0098	42.0852	30.6833	29.2119
RRBP1	ENSSSCG00000024692	67.6941	58.12	67.6292	27.0358	63.374	48.0054	18.3281	48.4193	52.6274	23.1007	29.9719	19.0016	28.6545	19.1287
RBM39	ENSSSCG00000007309	31.2903	32.1922	32.7624	34.9603	32.6536	35.7951	43.7899	31.8869	34.1009	39.3451	46.8079	48.7049	44.5479	48.1368
NOLC1	ENSSSCG00000010576	25.79	26.0214	27.7598	25.4031	23.4596	23.7807	31.0571	37.1835	32.9169	33.2202	34.3787	27.0663	34.4892	27.2676
MCFD2	ENSSSCG00000021325	31.4891	30.0164	22.1246	25.3131	22.3485	22.4702	35.4701	21.548	23.7278	30.0844	27.8835	37.3161	33.2987	32.5724
PLCD1	ENSSSCG00000027550	41.0379	38.9861	44.7755	66.7911	53.8465	58.1021	46.1859	61.0251	57.7994	78.8591	43.9372	61.2351	33.6489	29.802
MRPS11	ENSSSCG00000037343	27.3794	28.937	23.6768	30.7034	25.4734	21.6587	36.3437	28.4241	24.2175	43.5524	22.5991	55.3542	28.9143	29.3364
NOB1	ENSSSCG00000002753	30.5968	30.8702	32.7122	32.2104	26.701	24.4166	37.07	32.3675	26.3439	37.5942	28.1787	31.1513	32.0595	19.6345
ADAMTSL4	ENSSSCG00000006651	26.8908	22.1785	102.279	35.9053	134.073	101.997	32.9035	87.8339	95.012	36.3548	41.068	31.479	30.019	28.1024
RAI14	ENSSSCG00000016824	80.0382	80.7265	65.2346	41.6491	55.9944	48.9787	24.2691	39.6906	36.6398	24.6969	34.3855	23.5726	30.5895	31.2157
RNF11	ENSSSCG00000031172	29.9307	30.6401	35.735	48.1339	37.6025	41.3	35.0589	26.9641	26.6763	28.2252	38.9933	32.7051	57.3474	57.9701
PAQR9	ENSSSCG00000011683	37.2271	40.4237	25.4374	24.3167	31.331	28.597	52.9736	37.3191	39.7836	44.9994	40.5201	48.8981	46.0391	52.943
MED4	ENSSSCG00000035098	30.578	25.6827	29.2941	38.099	29.4654	32.1961	42.3604	28.0058	28.1765	41.4329	46.0333	56.3039	33.168	36.9378
NES	ENSSSCG00000006474	99.9777	85.8856	55.6959	27.3797	42.5455	30.3647	9.21922	22.9549	23.2699	9.90262	15.5574	10.1522	15.9691	13.8878
CHCHD10	ENSSSCG00000010073	9.98334	8.65864	6.2811	7.49269	6.53769	6.91695	7.05019	6.844	5.89785	12.2837	3.13013	9.35844	9.96507	13.6639
IL11	ENSSSCG00000040725	22.6117	22.8593	160.098	132.859	103.95	100.907	17.3803	13.4272	7.77606	6.75308	16.9645	16.7388	68.3294	64.0563
PAPOLA	ENSSSCG00000002505	31.6235	37.7089	33.4688	38.4672	30.696	34.6345	42.828	35.7459	36.751	41.1972	44.9623	49.1222	42.384	45.165
CRYL1	ENSSSCG00000009268	30.2568	31.6364	38.1681	46.3436	39.7221	37.6637	44.6357	44.8824	36.509	56.9836	35.8192	38.0673	33.232	61.5652
PLEKHM2	ENSSSCG00000003468	39.5384	39.7965	42.6996	37.1507	39.3377	34.8333	24.8058	44.2529	38.2817	29.9796	23.3712	22.0297	24.2112	18.4293
CERS2	ENSSSCG00000006644	35.076	34.3664	44.508	44.1223	48.1093	45.8758	39.0783	44.2629	49.4505	37.1424	38.3997	36.5188	49.6052	38.8652
MTCH2	ENSSSCG00000013232	25.7986	28.0588	21.9873	30.6723	24.5771	24.7989	37.6384	24.8727	25.2193	39.7059	34.3083	39.3477	35.1837	29.322
PLTP	ENSSSCG00000007435	34.3129	31.3995	79.7946	72.0103	78.9783	76.18	52.5518	63.791	58.7886	57.6496	38.8909	45.9968	42.8544	54.7078
TNC	ENSSSCG00000005494	61.2595	57.8151	96.9491	23.5699	93.9886	70.4176	12.8152	48.9217	47.3733	12.5439	29.7184	14.7495	27.296	18.1281
PSMC4	ENSSSCG00000039235	29.1303	29.0098	23.9002	34.3937	25.7472	25.0126	35.421	26.2546	26.6873	44.8636	24.1091	36.624	28.8619	24.009
SPTBN1	ENSSSCG00000040786	56.8948	50.9141	50.3253	31.7923	50.1395	46.9541	13.1335	38.1338	40.5753	18.0498	25.6708	15.6019	20.347	21.028
ERO1A	ENSSSCG00000005037	55.4045	51.6788	51.1655	45.5432	79.9822	82.6467	41.3896	44.781	63.8851	30.508	58.8744	45.6707	48.4262	55.8678
-	ENSSSCG00000047344	52.0208	48.9991	22.8708	24.2488	37.7832	33.1873	10.7328	10.533	19.0681	21.7958	10.7337	18.8537	22.7604	58.9751
NTPCR	ENSSSCG00000010166	34.8221	40.1853	38.787	49.3114	46.851	40.355	53.0436	34.3627	31.7081	54.2936	40.2798	57.7874	41.6381	52.2404
ATP5MC3	ENSSSCG00000015973	21.6546	21.4238	17.752	25.2489	16.2599	14.5012	31.553	18.2572	15.7655	32.4077	21.7571	35.1069	22.2232	35.2429
EDF1	ENSSSCG00000038203	33.4571	32.3017	34.8404	42.5599	35.8423	33.5549	32.3879	35.7392	31.5038	47.1564	25.7724	40.9905	25.271	37.2966
-	ENSSSCG00000015083	66.9369	63.0393	39.61	44.303	41.5779	39.9477	27.7466	31.9062	27.433	29.3165	18.8159	25.0567	40.1815	31.6973
TLN1	ENSSSCG00000005317	66.3214	63.9428	63.5892	36.6985	62.7378	53.4518	17.6471	57.9895	58.3303	30.3247	25.3215	16.5589	24.7648	13.9993
PDHA1	ENSSSCG00000023643	22.239	25.2658	20.6529	19.2735	20.0855	17.5842	22.0659	20.5167	20.8938	24.2584	25.9535	23.3816	22.2259	19.6128
PSMG4	ENSSSCG00000036988	30.033	33.6036	26.6663	39.5146	25.1834	22.162	43.5159	29.161	21.5638	35.7889	24.2206	37.4912	18.7924	29.5068
G0S2	ENSSSCG00000015617	44.2053	43.7865	19.7837	27.0768	21.4062	19.4171	24.8859	12.7661	14.0991	13.3069	15.3796	17.3587	22.7356	69.4089
CHMP1A	ENSSSCG00000023677	41.8897	40.1784	37.6082	39.1848	30.5539	29.1137	36.8409	39.7849	26.9861	31.4604	25.6831	23.8513	36.1002	22.928
UBE2B	ENSSSCG00000038953	26.6731	25.7114	20.101	33.1261	23.7522	25.7362	42.7702	21.6981	21.6364	34.7033	33.8081	42.6935	49.688	58.1137
AXL	ENSSSCG00000038806	45.7705	41.8572	54.312	35.8586	56.0152	47.6255	37.5171	61.106	56.0854	38.0046	46.1484	34.0093	34.3697	37.4654
FOSL1	ENSSSCG00000012967	22.7572	19.5601	34.4394	25.3741	31.752	27.9745	25.9215	42.6332	33.9508	28.8709	30.0494	25.4805	26.8068	28.2266
CDC123	ENSSSCG00000011112	30.8001	29.0013	28.7883	31.2981	28.5681	27.192	41.3618	28.5492	29.9703	49.3529	35.2861	55.3115	25.957	57.2055
SNRNP70	ENSSSCG00000023792	37.5946	34.9578	45.9729	26.4612	46.2566	37.9956	23.5327	44.7614	40.7861	25.1213	26.2973	24.0436	27.021	20.7821
REEP3	ENSSSCG00000036476	33.369	34.143	43.0282	47.6773	46.7819	51.3829	63.1971	32.934	40.4616	41.0961	55.2639	56.5713	55.3408	48.0896
AKR1A1	ENSSSCG00000029256	37.0108	34.4294	33.2284	41.4675	34.731	34.3167	36.2851	31.867	28.4187	46.8733	32.0926	37.5324	25.5157	55.1744
NRBP1	ENSSSCG00000022454	46.1617	49.2674	37.3175	43.6834	35.763	35.453	28.6518	30.9935	28.7876	37.5711	25.8744	31.953	23.3809	36.2772
-	ENSSSCG00000032544	44.9735	46.3113	49.7143	46.7132	52.5978	48.063	26.9114	53.3679	46.5955	50.392	26.0427	33.5226	33.8641	38.9981
HRAS	ENSSSCG00000031513	43.3776	34.0669	29.8419	34.2897	34.0337	30.7502	31.731	28.7859	27.8852	38.8824	25.3227	36.22	14.0279	37.3655
-	ENSSSCG00000036812	54.777	51.6876	53.5359	35.1577	45.6808	33.9652	21.7545	54.3877	42.2217	32.3158	31.7709	25.5414	30.9402	31.1414
-	ENSSSCG00000038967	26.5593	27.3882	41.7611	40.3816	43.6289	39.3698	41.0855	52.5742	44.3631	47.3874	36.596	37.5176	39.7253	37.2055
S100A12	ENSSSCG00000032857	11.6741	12.9658	25.0959	38.0848	21.6858	21.2977	85.996	28.8633	21.7341	49.0803	38.5203	82.0446	65.073	76.2295
SNRPG	ENSSSCG00000024776	25.3108	21.7457	15.6776	24.0635	17.6584	18.0176	67.4448	18.6158	15.7177	38.8955	29.4599	57.9709	39.1237	38.5511
PITHD1	ENSSSCG00000023495	32.858	33.1535	23.2244	29.2853	21.3995	20.6049	31.5995	24.0176	18.8257	29.4896	29.3863	30.1647	19.4621	34.6195
SLC6A8	ENSSSCG00000012771	44.0176	38.6352	49.9109	34.4833	49.8743	41.8122	26.6073	47.3533	40.3117	27.102	21.2147	24.0893	23.0276	23.5231
COPS4	ENSSSCG00000009241	33.8049	30.2762	21.2875	33.3544	25.1553	24.2889	31.9514	22.4674	24.1345	39.1094	27.8836	46.3013	41.4856	31.8525
-	ENSSSCG00000037979	30.4215	33.204	30.3185	32.5442	28.8588	25.0276	33.2576	32.1066	32.3903	41.7817	29.2035	35.0728	50.2267	35.4826
UCHL1	ENSSSCG00000022945	42.5027	39.3607	38.9364	44.4186	37.9429	33.4158	28.2804	19.9186	17.2948	29.6677	18.7002	30.4852	21.1387	39.2648
-	ENSSSCG00000013436	17.9054	10.188	8.74046	14.9085	14.8094	10.5376	30.5549	14.2896	9.55792	18.7709	16.3322	25.9486	14.4299	22.2383
-	ENSSSCG00000022842	17.0983	26.1615	36.5709	26.9833	15.8544	18.3401	41.3793	22.0644	14.6393	29.5777	23.9181	34.5912	142.568	187.607
SHMT2	ENSSSCG00000037077	33.9108	36.7663	30.8502	35.0412	34.6141	32.369	34.4318	39.882	35.0918	53.7867	29.9852	43.564	27.1061	42.9777
AVPI1	ENSSSCG00000036824	30.0244	25.0595	23.5795	29.3328	23.4428	23.8197	30.3488	25.5603	19.7054	28.2303	15.3598	20.6196	21.8709	21.8719
SOCS3	ENSSSCG00000036956	25.0062	24.1515	39.7742	35.6979	60.7986	55.5635	30.6054	51.0989	52.3401	40.193	30.092	35.8078	26.1839	34.7267
GAS6	ENSSSCG00000009565	18.5722	16.8082	56.1958	47.8861	52.8886	45.1122	42.696	56.1265	49.509	38.7185	33.309	35.0316	32.8631	47.1603
-	ENSSSCG00000038708	25.9314	24.7676	36.2934	57.0851	41.5846	42.2393	60.1562	36.5034	38.5494	61.2758	42.4706	85.6833	59.8482	61.4685
CAPG	ENSSSCG00000008239	30.1679	27.5602	47.7697	62.1879	54.1998	44.8838	51.3746	48.5017	45.8389	69.8694	38.7035	74.5254	49.78	62.1725
KPNB1	ENSSSCG00000017514	39.9406	43.1283	35.232	31.0336	35.6212	36.065	30.3648	36.1045	40.7456	31.5503	40.5109	28.4157	31.3732	24.8903
BTBD1	ENSSSCG00000001801	26.3596	30.0345	24.3747	32.0942	27.215	29.3681	35.1937	25.5123	26.2259	38.3147	35.1527	36.7217	36.0083	43.4297
RFNG	ENSSSCG00000040385	44.4492	41.2083	36.8448	41.8836	36.8212	32.8939	36.3985	40.8492	32.7306	44.6244	27.4824	34.1671	37.2451	45.6501
-	ENSSSCG00000021560	36.513	38.5685	30.7322	38.7635	30.1577	28.516	32.631	31.9307	24.8243	36.7039	28.8359	33.7266	26.8426	32.6701
PAK1IP1	ENSSSCG00000001041	19.6523	20.5032	17.2525	24.5456	20.0792	22.1841	37.1156	19.8192	24.4165	40.7764	38.5557	37.9868	39.0677	53.6855
C1QTNF6	ENSSSCG00000030325	69.019	67.3954	58.8168	44.8551	55.7869	46.9235	36.7555	47.0252	43.1311	36.9485	27.1702	27.1434	34.6225	27.6443
CCDC80	ENSSSCG00000011928	103.507	95.9934	47.2904	32.8861	36.6953	30.5038	21.2985	22.6097	20.1668	16.476	21.9031	19.4686	27.2733	27.5702
-	ENSSSCG00000037602	27.44	26.2181	23.6563	32.1546	21.425	25.1259	53.343	22.2386	22.9965	40.0783	36.5878	53.6049	53.458	45.528
PTP4A1	ENSSSCG00000025941	20.0077	21.6838	37.1474	43.507	35.2671	38.6658	54.6356	41.6042	42.4557	45.4085	57.237	44.2236	74.6223	64.6261
DDX39A	ENSSSCG00000013776	32.0454	33.4325	19.5898	23.0378	15.2072	15.1102	26.7744	20.7969	16.4767	24.0753	27.139	22.3162	24.0341	24.3051
UBQLN1	ENSSSCG00000021005	30.7345	31.0351	32.5924	37.3662	36.7557	38.8603	34.9421	33.6056	36.6251	37.1591	42.1303	36.5855	38.1258	29.9244
GATD1	ENSSSCG00000012846	36.5093	39.0766	40.6146	36.5743	38.9366	32.274	29.8459	40.8135	36.3749	35.5839	25.7358	27.2757	24.3685	38.328
PSMD4	ENSSSCG00000006628	33.2387	35.5663	33.9138	36.0659	29.0725	31.1058	35.7853	30.9355	31.1054	47.9159	29.7795	42.1458	21.682	32.8982
-	ENSSSCG00000001927	31.1904	28.4116	43.4845	43.947	46.2028	41.5194	52.9359	41.7475	42.9619	51.3073	41.8652	45.1089	44.0669	47.3539
FUCA2	ENSSSCG00000004133	30.894	30.0217	37.7805	39.0968	43.9224	46.6355	58.3993	40.2858	50.1697	48.2559	51.7504	60.8325	59.3832	59.5693
TTYH3	ENSSSCG00000007565	91.0402	85.2705	71.5214	30.6636	55.3147	39.1137	18.876	46.4873	40.4237	16.4583	21.5381	13.7904	22.6307	17.62
ACTR3	ENSSSCG00000015710	29.0761	33.8176	27.4508	37.066	28.669	30.757	43.3262	27.5905	30.7968	39.444	43.11	47.4051	50.711	42.5996
-	ENSSSCG00000034846	24.1008	11.2501	15.5111	17.9679	31.5336	9.50184	562.811	29.8808	18.6501	21.851	18.827	26.182	44.2373	37.7278
RPP21	ENSSSCG00000021130	27.7444	28.9863	21.391	35.9869	31.6059	28.2068	35.4543	33.021	24.2714	38.3411	19.1432	28.5909	26.2141	71.9475
CTSF	ENSSSCG00000038918	35.7744	32.1122	54.0991	51.3439	56.6208	49.5717	46.3522	51.0763	50.4257	53.2239	37.5505	41.1172	40.6705	36.8281
IPO7	ENSSSCG00000028886	29.1075	33.09	26.2252	25.3469	28.5189	30.7849	37.4994	30.2286	36.1591	35.3558	42.4894	40.0604	36.55	28.53
NDUFA9	ENSSSCG00000000719	22.8661	23.3698	17.5773	23.7075	18.7024	20.3506	25.5161	20.115	19.8716	32.9544	21.1394	31.4648	20.6138	30.6872
GCK	ENSSSCG00000016751	5.60732	4.16542	6.10158	5.10893	7.22994	6.11939	4.96901	3.77424	3.39202	2.66032	2.38797	4.16786	5.06735	10.8744
KIAA2013	ENSSSCG00000003432	39.0236	37.9373	45.5726	37.5889	44.8124	40.1743	36.6868	44.8679	38.2233	37.7631	24.999	36.0636	26.3754	47.2915
CRISPLD2	ENSSSCG00000002669	33.2797	29.1764	54.3685	23.4593	60.0666	51.4116	38.9658	75.4493	69.5982	32.0793	44.6336	20.9944	39.935	39.2882
PMPCB	ENSSSCG00000015422	23.4546	26.1392	22.9717	31.1418	24.3196	23.3216	40.8064	23.7035	24.2163	42.2806	32.5869	50.6203	44.6757	30.3943
LONP1	ENSSSCG00000027128	38.611	37.1786	35.8003	37.3928	43.2201	38.3866	27.6494	38.2763	34.4339	41.4094	28.2655	22.3402	23.6189	28.0217
GNL3L	ENSSSCG00000012336	31.4728	30.4755	27.808	31.47	28.8458	29.995	35.2981	28.9703	30.333	43.7309	32.6722	35.9597	37.8285	55.4604
RNF181	ENSSSCG00000008232	28.7291	26.8669	30.1757	40.7451	33.1662	31.6222	43.0184	26.8717	21.2379	46.5138	26.8024	55.0833	20.4511	39.4936
-	ENSSSCG00000045485	21.9635	16.9293	13.0772	21.2251	15.9978	13.4391	28.8452	15.5941	10.8693	26.1015	16.496	26.5133	22.2975	29.6209
-	ENSSSCG00000032235	37.3253	37.4134	37.5206	39.6061	36.7385	29.7645	33.4968	34.6205	27.6937	43.565	23.7197	34.3586	32.479	58.3569
ISLR	ENSSSCG00000001910	87.8325	83.2941	68.4568	46.0684	65.5699	58.9548	39.6714	46.5692	49.9386	38.6822	33.5643	28.5312	39.3814	41.4092
MOB1A	ENSSSCG00000039221	33.005	34.0699	31.9486	39.052	32.5657	39.5692	44.2827	34.3227	37.0797	36.0462	49.5023	45.96	57.1287	48.3279
-	ENSSSCG00000018077	15.3002	10.1187	6.44299	5.52967	5.98115	3.44966	4.56642	4.07656	0	0	4.14645	0	8.12543	51.4935
RCAN1	ENSSSCG00000012050	50.0568	42.1722	28.2006	26.1909	53.3666	60.1856	25.088	25.9467	38.7018	41.8782	29.476	44.2963	26.4547	54.8084
TPRG1L	ENSSSCG00000003359	30.3361	30.7941	34.4755	42.1501	32.1717	28.9395	36.5776	34.98	24.4679	46.645	22.571	46.6251	26.4192	73.0745
-	ENSSSCG00000014565	44.8169	40.3879	43.805	47.7156	44.373	39.8103	33.8357	29.6824	33.0381	38.0322	26.3591	39.6676	31.4485	35.6662
ATP8	ENSSSCG00000018080	27.1324	24.7347	4.56378	4.60806	3.18995	6.89931	4.56642	3.05742	7.42297	4.70106	6.3579	8.67518	17.0634	8.58225
LITAF	ENSSSCG00000032381	34.6745	36.2207	43.4629	55.2851	41.3595	39.4982	38.6274	38.2747	35.0698	45.5604	38.9838	39.7165	42.7615	49.3364
CRK	ENSSSCG00000038989	32.9446	31.6381	26.7578	33.5644	30.3251	31.9473	36.1011	29.3436	29.8383	35.2859	37.5608	39.3143	44.4504	34.0531
-	ENSSSCG00000004024	40.1585	39.3109	39.8551	43.2712	37.413	37.9957	40.6947	42.9502	37.5533	37.5262	33.2812	31.3592	40.7018	44.295
AMCF-II	ENSSSCG00000008957	3.67838	3.99526	75.7176	69.0902	75.3085	51.7885	69.9497	45.9626	25.2953	41.6708	62.4675	49.6668	87.5135	62.7161
TRIP10	ENSSSCG00000013554	35.1084	32.6959	29.158	28.9881	31.7224	29.3659	33.6749	34.2559	36.7455	43.0145	34.1674	41.8618	37.4721	34.9533
DRG2	ENSSSCG00000036328	32.4808	32.7654	27.2001	34.1639	32.0146	26.4513	29.6223	32.6542	29.5451	37.2418	20.4353	28.7793	25.0217	29.4179
-	ENSSSCG00000044841	30.3895	29.6971	18.6254	26.5933	25.1071	29.104	53.3973	26.0642	34.147	42.342	43.085	48.7007	42.2709	57.5532
SRI	ENSSSCG00000015298	37.7159	36.8961	29.9975	42.4699	34.334	34.465	47.6598	26.2469	26.7809	51.3217	41.2284	54.274	46.999	37.5094
PFKP	ENSSSCG00000011158	32.2323	32.7959	38.8318	40.8791	44.7592	44.3251	29.4721	46.4733	45.357	49.691	26.5342	38.8091	36.0412	36.6427
DNAJC8	ENSSSCG00000038907	27.5767	29.3823	30.3288	33.4307	29.8	29.6596	41.6525	27.9749	28.5019	35.5332	35.2507	44.6862	24.2855	33.6889
CXCL8	ENSSSCG00000008953	5.6227	5.33613	16.6267	22.5571	21.768	24.5222	41.521	20.8411	11.2084	15.5084	34.7999	26.5414	38.3052	31.3563
SGTA	ENSSSCG00000013467	34.8953	33.5688	36.2735	38.2625	32.5545	32.6641	29.1028	36.2456	33.0495	38.4008	28.8094	32.655	30.655	33.5924
HIF1A	ENSSSCG00000005096	34.08	37.5305	37.6392	43.3145	39.8535	49.8167	42.9537	36.4035	42.6719	32.1856	48.4801	45.3297	57.9661	44.5556
-	ENSSSCG00000002650	33.095	28.6242	22.0898	28.0768	22.6513	20.3314	38.0495	27.0661	20.0479	31.9955	20.8545	27.8035	32.8201	6.62254
EIF1AX	ENSSSCG00000032223	28.264	27.613	20.4979	27.4779	22.9876	25.3165	37.7007	25.1078	26.8701	33.4966	36.3153	39.9494	37.7648	43.313
FOSL2	ENSSSCG00000032527	23.1166	23.8086	75.8068	53.0991	82.0847	68.9104	36.2898	72.2756	62.5001	31.3137	45.9353	32.5646	56.103	39.8626
OSTF1	ENSSSCG00000005273	38.8337	42.7096	26.6784	41.2381	28.6	31.7113	47.9991	27.7171	28.8634	39.8111	36.3182	55.805	42.0081	32.722
NFE2L2	ENSSSCG00000015987	30.447	32.0824	41.1278	49.7418	42.2693	46.1905	45.1668	36.0208	41.5268	49.5957	50.6182	59.5705	52.8512	58.4401
PLVAP	ENSSSCG00000037025	85.4713	74.7766	25.4268	26.6268	22.7736	23.3228	21.6274	26.1588	24.0755	12.2239	15.2554	13.4401	14.471	26.7634
NXT1	ENSSSCG00000007119	27.3232	25.6016	29.0744	36.1843	28.1509	22.1558	43.7866	35.5216	24.2988	33.2894	40.5076	38.9157	28.0604	65.7361
LMAN1	ENSSSCG00000004908	35.0627	34.1786	37.7362	29.3505	47.8368	46.0944	47.2493	39.739	47.401	35.5238	59.3654	48.5851	52.0127	45.283
-	ENSSSCG00000020686	24.013	23.3989	25.8559	26.7167	27.0349	24.4192	24.7066	29.1524	24.688	31.7216	20.0294	26.0954	23.1886	30.73
GLUD1	ENSSSCG00000010368	31.1482	33.1364	31.3576	36.634	34.0421	36.6033	34.1081	34.7935	34.9857	40.077	38.5202	42.2393	33.002	37.7513
RAB7A	ENSSSCG00000011615	35.8519	36.1477	37.9662	40.4125	37.52	37.1369	32.4687	35.9542	32.0594	34.5658	35.9345	30.7004	28.7147	26.7178
PPP1CA	ENSSSCG00000012913	35.7191	36.4749	29.2453	38.91	25.1218	25.4568	30.5297	25.3379	23.3272	37.0972	24.3159	31.1157	32.6809	43.0052
SRP72	ENSSSCG00000008900	34.1529	33.4931	34.3462	38.7814	37.6232	37.5505	35.2585	39.2587	39.5745	42.799	46.0121	46.6509	36.508	32.6816
CFAP298-TCP10L	ENSSSCG00000040827	26.0851	25.1964	24.1597	32.0604	29.5795	28.3737	43.3336	27.1569	25.8876	47.079	41.8217	52.4994	46.1058	44.9163
EXT1	ENSSSCG00000006009	40.3623	39.9435	61.775	46.5597	59.5636	57.4141	30.6841	36.8969	40.2676	30.8453	37.8584	31.8947	28.4021	38.8282
CORO1C	ENSSSCG00000009944	31.2436	35.7642	30.1947	36.3646	31.4399	35.2528	34.2954	40.6159	37.9207	39.3455	46.5902	30.9072	29.986	43.3615
BCL2L1	ENSSSCG00000035357	31.41	31.391	55.5535	42.9323	66.0015	56.4679	43.1167	52.0929	57.2296	42.8269	42.8895	32.0785	25.9347	50.3133
-	ENSSSCG00000021374	11.5761	9.92413	4.58886	8.80645	4.88844	5.12331	5.82929	4.09336	2.97955	4.87413	2.86607	4.31495	7.2861	0.11452
PEPD	ENSSSCG00000002868	35.5131	33.3272	32.0041	42.4886	31.9538	31.5239	35.2414	37.6686	28.7558	49.92	27.8142	39.3319	30.1697	31.9787
ACTN2	ENSSSCG00000010144	2.36223	1.90381	0.0955016	0.0852424	0.0496474	0.114537	0.067686	0.0936589	0.0249792	0.0543518	0.22126	0.24689	0.39986	2.11534
VAPA	ENSSSCG00000038465	30.2123	29.6125	26.5298	33.6434	29.7334	30.5392	28.7128	25.9959	28.0137	37.2879	29.2177	35.5379	27.5685	23.0211
MARS1	ENSSSCG00000023318	35.802	37.2653	31.0564	35.9301	32.3739	33.135	27.869	33.3304	36.0748	45.2228	30.6506	37.8862	26.3033	34.4821
CDK9	ENSSSCG00000005621	37.9544	41.771	37.1071	38.5042	30.274	30.4338	30.4036	34.8918	30.5633	36.6261	29.461	23.0528	28.5586	27.3745
COQ9	ENSSSCG00000025284	16.7501	15.6302	14.3306	19.0274	15.9564	14.5374	19.0955	17.0906	15.0855	20.6896	17.3464	24.4538	13.1267	19.3359
-	ENSSSCG00000029160	18.7583	16.6561	21.7044	19.971	25.4043	23.4904	12.5807	21.6628	21.5427	19.191	14.5111	11.4591	12.861	15.5665
MIEN1	ENSSSCG00000017496	24.2822	21.4042	28.4798	40.3638	31.2678	26.0423	52.9623	27.1595	23.0597	45.2691	33.7033	41.3628	28.5028	39.8063
GLUL	ENSSSCG00000015545	28.4358	25.9996	26.4226	30.2034	24.1721	26.1426	34.8817	40.9162	37.5467	42.1151	39.3157	30.1794	42.3963	24.4724
PET100	ENSSSCG00000034876	21.5347	15.0707	21.9287	29.5718	27.56	20.9048	69.287	21.3454	14.7067	25.4031	24.4326	41.0637	25.7544	45.7082
MTA2	ENSSSCG00000013062	37.5001	38.7727	31.664	31.5787	31.7562	32.0054	26.5534	32.6385	33.6267	30.7687	26.6125	25.3828	27.5736	35.5402
HNRNPH1	ENSSSCG00000014022	36.4608	38.8623	22.2299	22.6971	23.6502	23.4918	28.7562	24.4139	22.04	26.0318	30.7509	34.2599	27.5238	27.1617
ALG5	ENSSSCG00000009360	22.952	26.0726	24.8049	34.5629	29.5106	33.3324	52.7179	28.3115	32.058	54.9348	41.5176	59.6461	31.9937	57.6781
RNF10	ENSSSCG00000009910	36.112	33.6391	36.1175	36.2435	36.6857	36.0868	23.6014	36.4454	35.8393	34.4635	33.7152	25.8057	24.4933	20.8592
MBOAT7	ENSSSCG00000003267	37.218	31.076	49.4042	36.6045	57.3118	50.6298	36.4126	56.1116	55.1967	40.2458	28.6358	30.0593	28.8979	36.4502
NFE2L1	ENSSSCG00000017525	45.989	38.9912	47.85	21.3979	45.1215	36.2032	19.2938	39.0841	39.9217	17.2357	26.6559	15.3563	24.5763	21.5145
UBE2J2	ENSSSCG00000003334	35.2503	34.0493	36.6891	37.5167	29.6687	25.6673	34.8268	32.5357	26.0919	34.7617	25.7099	23.6721	29.2711	30.4079
BAG3	ENSSSCG00000010686	27.8079	26.9812	38.221	30.4538	30.2599	31.9203	19.321	35.0732	33.6768	27.5649	25.5213	18.6412	22.1433	24.4236
FABP3	ENSSSCG00000036883	9.98655	11.1677	2.72393	3.1827	2.12942	2.16973	5.64493	3.23528	3.53555	6.82024	7.38112	3.32019	4.24281	0.290996
DDX39B	ENSSSCG00000001400	32.6763	33.75	28.5068	27.4707	28.198	25.7202	24.515	31.136	30.2586	25.4279	25.1954	25.4986	28.0339	20.9838
PDHB	ENSSSCG00000025881	22.2816	21.8045	19.3661	24.8136	20.9669	20.4531	29.9729	28.0487	22.7913	37.6702	27.6575	37.9783	23.8242	36.6114
HNRNPU	ENSSSCG00000010877	31.6086	32.0614	35.6867	31.7454	33.8163	34.4695	27.0177	37.3872	39.1777	33.4533	38.0882	32.9882	35.1651	23.3144
-	ENSSSCG00000034709	24.6497	27.1497	24.2419	27.1976	20.0223	20.8222	33.3136	28.1471	24.4634	25.0775	33.4094	27.6286	38.3825	28.235
SH3BGR	ENSSSCG00000029219	8.57514	6.78884	4.74663	6.24134	5.18791	5.79249	5.24721	4.0799	5.28733	7.33182	4.33428	10.9252	6.18941	13.4293
-	ENSSSCG00000037143	30.0875	28.914	22.0889	28.7193	24.1341	23.0454	36.9839	23.1934	19.3844	35.3668	27.6667	38.6949	19.1089	48.7259
HEXIM1	ENSSSCG00000017336	29.8511	32.9469	41.2179	33.3639	26.1434	24.1522	29.4106	39.6151	24.2354	21.7542	37.7022	20.6216	25.5947	15.6071
OGDH	ENSSSCG00000016743	31.7226	29.5104	37.3989	30.5229	39.9869	35.4151	17.6469	40.3826	34.9592	28.6577	22.1365	18.516	23.6461	20.3594
-	ENSSSCG00000005768	24.8326	24.2226	23.9847	36.4104	27.3562	29.3414	54.8955	25.5364	26.6361	41.6049	45.3368	54.5815	49.8006	46.3077
POLR2C	ENSSSCG00000025454	30.7379	32.3783	30.5533	34.3913	30.7298	28.3412	37.6494	33.6781	29.1512	36.0893	34.7255	30.2201	24.5892	28.3265
GYG1	ENSSSCG00000011698	18.4586	16.7741	18.5528	23.7291	17.5255	17.8251	28.06	20.4119	21.2224	26.8587	24.6211	29.0026	26.1736	19.4067
RHOQ	ENSSSCG00000031261	23.0386	26.1037	47.3827	50.191	36.5373	42.5607	40.3729	41.3129	38.575	25.9094	39.5054	32.2659	42.0655	46.2453
RAP1B	ENSSSCG00000032595	32.0111	34.7785	24.4501	38.5117	27.0534	30.3505	39.7609	25.4452	27.1785	36.6581	43.6306	46.4888	45.1743	38.7868
IL1R2	ENSSSCG00000028331	0.83718	0.558521	4.52271	4.00103	7.64347	10.1083	133.861	69.8702	80.6616	133.547	82.9607	131.63	70.2288	74.8966
-	ENSSSCG00000012523	28.9914	27.2864	26.4959	35.0668	29.7848	26.481	50.795	26.4519	24.1827	45.669	40.0669	45.9687	41.5219	33.8331
MRPS18B	ENSSSCG00000029425	27.2772	25.1408	27.5556	33.4853	31.5385	31.4086	47.6852	29.2769	29.4959	50.9793	34.587	41.6044	34.8966	33.2312
LPL	ENSSSCG00000040631	8.44155	7.94654	17.7585	20.7001	25.0751	27.2445	46.9802	44.6045	61.3695	40.3731	49.0707	39.1367	38.7732	25.6999
CWC15	ENSSSCG00000014961	25.1553	27.3344	23.8192	28.1584	24.4217	24.0736	46.9969	20.9843	22.1686	39.0285	32.509	40.809	27.1849	35.7846
NET1	ENSSSCG00000023105	68.1723	60.8654	51.737	65.2424	29.8739	30.5751	16.3769	12.2291	8.96973	11.6476	15.1837	11.554	23.1953	29.9545
SMARCE1	ENSSSCG00000039137	33.5743	34.3505	26.9115	33.2344	29.9319	27.7114	34.302	28.1953	25.5419	40.3663	33.1222	42.0474	29.7839	47.7821
TSPAN15	ENSSSCG00000036152	63.253	58.4075	44.2769	46.5788	32.6691	33.8685	31.726	26.9843	26.8609	28.4728	19.6027	26.697	35.8286	19.2477
MARCKS	ENSSSCG00000037803	53.729	54.6284	33.3945	38.5793	29.1674	27.6703	24.2443	24.3239	20.5027	18.4116	26.8384	21.9833	31.7232	22.4181
PKN1	ENSSSCG00000013779	50.2244	46.3015	43.289	43.8554	39.1099	38.1054	29.6557	37.4275	32.969	35.7855	22.9012	24.2422	24.594	32.1935
UOX	ENSSSCG00000022206	30.8575	27.9437	23.895	33.0975	24.1133	23.4577	30.212	20.4122	20.0599	30.2101	20.1155	36.1595	42.1832	58.0875
LAPTM4B	ENSSSCG00000006083	33.2277	35.7605	30.6705	31.8016	34.0417	30.1804	33.0655	32.7375	32.9458	32.1073	36.0542	34.6658	22.905	44.0965
CSRP1	ENSSSCG00000020976	31.579	30.0713	45.8827	51.8884	40.9529	37.8946	41.7739	38.7356	33.1461	49.6207	27.1185	40.0109	26.3312	36.613
METTL9	ENSSSCG00000030373	34.4204	34.4771	20.9191	35.1076	25.099	23.6508	26.9891	18.0704	19.2089	29.7664	27.1898	30.4401	23.5823	26.6587
-	ENSSSCG00000014031	25.7089	26.9372	25.0746	26.8456	20.2448	18.2485	26.6372	30.4783	21.7469	30.7901	29.1355	28.3723	29.166	25.1442
-	ENSSSCG00000032768	30.6814	32.2444	18.8815	28.4137	20.1828	19.0409	40.1463	28.1266	22.2956	45.3025	31.8059	42.4293	27.742	34.0458
FMNL3	ENSSSCG00000025114	55.95	55.0313	49.5638	43.9452	45.4914	43.6582	21.4525	36.2337	35.2809	28.6491	23.6815	21.0512	28.2762	33.2577
P3H1	ENSSSCG00000023920	41.8178	36.2488	45.4604	30.3994	50.9816	43.5455	24.9584	43.3011	40.9985	25.5211	27.592	22.5275	24.6196	30.1342
NPEPPS	ENSSSCG00000017513	36.3605	35.5465	39.1283	39.0599	46.6898	47.5048	33.5003	37.9912	46.9113	37.2409	43.5644	36.5373	40.6856	38.4523
MCUB	ENSSSCG00000009141	35.8944	39.385	27.1688	36.6029	27.1675	27.5261	35.9035	25.176	25.8349	45.4035	35.4651	47.8382	36.1734	68.455
EIPR1	ENSSSCG00000028755	29.7692	25.3032	19.1193	28.4794	19.4401	18.4145	26.9822	24.4674	19.1583	38.7768	23.9507	33.9752	18.018	36.341
-	ENSSSCG00000035733	43.9014	37.2811	70.5482	33.1938	64.0195	51.5406	26.7468	60.2188	61.2141	25.9201	27.7648	21.2616	29.8512	21.8898
NDUFV1	ENSSSCG00000012896	20.1244	21.486	18.6936	23.412	19.5132	17.3189	20.8385	22.4507	20.3598	33.9778	14.9713	22.9887	10.0587	29.7225
CRELD2	ENSSSCG00000000981	42.255	35.656	17.6728	17.1861	20.7601	16.8377	28.0671	24.2343	21.1161	27.0937	19.3739	24.9175	22.5757	22.6072
SCARA3	ENSSSCG00000020846	93.9975	84.8287	57.5759	36.6645	49.2117	38.7567	20.8984	32.3441	31.6611	21.5146	24.1939	16.4778	24.1752	20.3903
TMED4	ENSSSCG00000016744	32.4403	29.9987	34.4247	37.0537	42.431	38.666	35.5237	37.8927	37.0591	36.972	28.9515	31.1181	18.1319	33.1992
LMOD2	ENSSSCG00000016605	19.2453	17.1929	1.43556	0.941515	1.38437	2.60641	1.6198	2.752	0.384288	0.506523	4.4125	1.45401	1.31863	2.6094
ETF1	ENSSSCG00000014337	22.5645	22.4958	23.4959	27.48	21.7077	23.1502	34.943	25.6945	26.0175	31.5559	38.553	33.1119	34.1621	31.3439
SIRT2	ENSSSCG00000026794	28.3681	27.2479	33.8988	40.8804	37.4949	41.9511	30.4829	38.333	36.0757	48.7783	29.5788	33.4337	32.2434	23.8147
SERPINE2	ENSSSCG00000016233	90.0067	95.3022	91.7632	52.291	80.4924	75.9855	12.56	11.842	10.6341	13.1168	15.3953	15.2002	27.5866	26.1905
-	ENSSSCG00000032959	29.983	29.0267	26.5129	44.7207	26.0982	27.6604	41.9546	25.4487	21.7374	38.8116	27.3002	34.4053	26.7489	49.2595
TCEA1	ENSSSCG00000006261	24.8222	27.6733	23.6712	36.4849	27.3136	29.4242	47.4415	27.0084	29.888	39.1923	42.5489	47.5817	48.3864	36.149
ESD	ENSSSCG00000009407	23.1402	21.5793	20.9259	35.7217	26.8798	28.0123	39.8617	24.7005	27.8683	51.2813	39.562	61.3039	47.2015	63.4848
-	ENSSSCG00000026430	25.9664	22.5179	26.6523	29.504	26.9249	34.8584	31.3985	27.3915	30.7416	31.4473	42.358	35.0896	43.7853	34.8236
NPPB	ENSSSCG00000003431	15.5561	10.437	0.834414	0.133678	0.454434	0.262097	0.551959	0.686328	0	0.146117	0.515517	0	0	3.93776
YBEY	ENSSSCG00000033116	26.9326	27.8275	24.7477	31.7192	25.0852	24.1573	28.5121	26.6949	23.5841	32.2731	21.5476	26.6407	29.1967	16.4207
ASRGL1	ENSSSCG00000013065	30.721	29.5802	31.1698	34.199	33.9125	30.1999	34.7866	29.5626	28.6277	37.3072	27.5379	31.7787	30.3152	47.8775
SFRP1	ENSSSCG00000025822	78.7774	75.9429	115.533	72.6492	81.8264	70.7758	12.4808	10.789	9.54955	8.85153	14.0695	19.2615	29.1473	30.3797
-	ENSSSCG00000004441	17.5273	20.6161	39.7133	34.303	40.7548	41.0629	54.5885	55.415	53.535	44.2473	63.3442	48.0217	56.9922	60.3591
CLTB	ENSSSCG00000014058	20.0929	19.7442	18.15	20.4897	17.4402	15.4723	29.412	20.7031	18.161	28.5979	22.9323	30.2178	19.2266	32.7779
ABCF1	ENSSSCG00000001346	31.8832	33.2706	31.0107	27.9303	27.1673	27.1735	23.8227	32.4395	28.9549	32.775	24.8438	28.2631	24.0557	22.3888
TM9SF2	ENSSSCG00000031808	36.0588	37.1444	31.8841	33.7022	38.6185	40.4281	37.801	32.1	38.433	32.2693	43.9382	39.5451	44.5623	36.7817
TBRG4	ENSSSCG00000016732	26.5254	27.3154	23.1895	26.95	22.6055	19.3089	22.4319	27.4945	23.6728	29.976	17.1245	24.3117	23.9696	32.3961
PHF11	ENSSSCG00000009396	36.7905	35.9274	28.2763	32.7153	35.0309	36.3348	28.5605	30.7334	33.08	35.3763	31.1864	32.899	42.1481	35.6122
SURF1	ENSSSCG00000035727	23.6586	20.7086	23.4558	28.6063	24.717	24.4985	36.9757	29.3473	25.1613	40.5501	23.5359	31.7529	32.0502	20.6952
SNRNP40	ENSSSCG00000003596	28.8212	29.153	20.2589	28.2982	19.9536	20.1431	31.7609	21.3494	21.0217	34.4002	28.6576	28.7086	20.8748	25.9364
HARS1	ENSSSCG00000014375	29.2459	26.796	26.5744	31.7015	27.9079	27.0899	32.4828	33.8253	25.9421	40.1536	24.9689	33.406	23.549	30.0496
MAGOHB	ENSSSCG00000000635	20.9937	24.2639	17.7469	22.3182	19.9736	19.8528	37.0568	18.6373	18.6403	33.4802	28.3215	37.8385	32.4872	34.258
DHRS3	ENSSSCG00000003439	109.684	98.1346	30.5231	37.4808	27.4851	20.6417	13.3126	14.3543	12.1508	8.0432	14.3548	10.2903	8.73505	8.3996
-	ENSSSCG00000028542	40.6434	40.0398	45.6555	34.5933	50.7844	44.9189	24.1974	42.9007	47.7633	35.7334	33.5951	29.0807	29.3413	19.5416
-	ENSSSCG00000023158	15.3936	13.3104	20.0688	34.5583	25.9322	26.7328	63.5338	23.3833	20.7283	43.4488	38.7052	57.9587	52.7485	66.3657
DKK3	ENSSSCG00000013401	37.0579	34.2869	58.6471	41.7988	64.9093	58.8806	36.4991	37.4597	38.3661	36.7779	37.1569	42.9468	39.2547	38.6093
SAR1A	ENSSSCG00000010260	26.826	27.2908	25.5355	29.3345	27.2204	28.117	39.1944	26.3939	27.1353	31.2834	37.2305	41.5076	48.4196	28.1981
EPRS1	ENSSSCG00000010821	34.0404	34.7789	33.1404	29.1279	35.6586	36.7379	24.8977	35.1465	39.8359	34.6359	35.3181	29.8251	25.1957	32.332
CXCR4	ENSSSCG00000039416	69.7026	65.0131	43.0098	58.3935	26.3308	34.3204	36.1114	23.8013	23.5908	15.0138	31.4077	22.6915	49.5916	30.1126
-	ENSSSCG00000036618	18.4065	17.7982	23.909	39.1058	33.4206	42.5187	57.4603	32.0767	39.3363	55.2394	42.3422	70.6884	48.7173	73.7948
SEMA7A	ENSSSCG00000023165	122.368	110.637	52.0152	36.2219	42.0858	39.8248	14.7437	16.7816	22.1332	12.0167	13.7916	11.7285	18.1553	18.5782
CDC42SE1	ENSSSCG00000031881	43.304	44.0574	26.7548	31.7659	28.1283	27.5817	27.4845	23.6648	25.6795	27.6486	26.0688	30.3484	26.0014	28.1503
SRSF11	ENSSSCG00000003791	30.2777	31.427	30.9821	27.8572	30.5716	32.8446	31.6889	26.507	32.7549	33.6294	42.3173	48.5868	44.9792	35.2348
PTK7	ENSSSCG00000001660	63.3528	58.5519	56.556	31.2949	51.0773	42.6023	25.1072	41.3749	41.0657	21.6339	27.4416	18.5428	25.5266	24.5686
-	ENSSSCG00000036820	19.5032	20.2486	26.4753	35.3323	26.3043	31.9801	45.8119	29.1149	29.0603	43.6381	33.8017	36.3896	42.4042	30.1416
MRPL16	ENSSSCG00000013118	22.8987	23.3896	22.7147	29.3603	24.7931	23.2791	35.9591	22.494	21.8026	35.58	28.7109	34.883	27.7947	41.1142
LOX	ENSSSCG00000014232	33.6376	35.7533	43.6222	32.9459	47.8156	51.323	50.6033	51.441	66.4418	33.3342	54.693	40.3918	52.8126	46.1656
NID1	ENSSSCG00000026819	65.2968	60.184	36.7237	12.8356	39.5903	29.4915	15.2933	46.0978	48.1465	16.7806	26.7415	18.024	24.8967	20.6515
HSD3B7	ENSSSCG00000032369	24.3699	20.8235	51.3012	64.9023	56.5244	56.953	46.7941	49.0429	49.2642	59.972	42.2807	48.5649	36.2356	47.5405
-	ENSSSCG00000038630	22.0802	23.3283	18.8131	29.6493	18.7449	22.3106	47.8302	21.9003	25.9169	39.92	29.9194	61.9841	34.5837	36.3854
SORBS3	ENSSSCG00000009626	50.4484	45.316	43.9796	42.849	42.4923	38.2685	32.4579	43.9932	36.2499	37.2699	24.5582	16.9612	20.8035	11.9414
GLIPR2	ENSSSCG00000031236	35.4307	37.2376	25.5807	31.1646	24.6876	21.4822	39.1301	23.361	21.1508	34.4461	28.2348	39.2551	32.4957	29.4655
TNIP1	ENSSSCG00000017091	36.2248	35.1981	33.8458	34.2147	29.9536	26.4472	23.1806	31.5052	22.2416	27.8424	21.7993	23.9272	22.8784	28.6278
DCTN3	ENSSSCG00000010972	23.5957	24.5033	23.9243	31.0024	24.5499	21.521	40.7457	23.3594	20.0941	37.7525	24.1415	40.5908	17.8537	35.8279
CTDNEP1	ENSSSCG00000017935	42.0523	34.7259	41.9717	33.1683	36.6607	33.6033	28.9701	36.0063	33.0344	28.2686	21.6868	27.0092	25.4194	34.5425
DNPEP	ENSSSCG00000016220	29.0801	29.5388	29.8103	40.559	30.2228	28.8916	31.8213	32.6193	30.1975	45.8253	27.4702	39.3931	27.3104	35.3271
WDR13	ENSSSCG00000023759	29.5115	31.6316	32.7933	34.0565	30.3509	28.0221	26.5252	30.4107	26.0871	35.2537	18.6936	27.6022	23.2761	32.1524
KITLG	ENSSSCG00000035495	29.0078	30.3588	56.9042	41.5265	52.1469	49.2159	44.5563	34.9178	40.8765	24.219	58.7028	43.6856	63.149	40.8822
PPP1R9B	ENSSSCG00000017584	44.424	38.0846	53.6963	29.1281	50.38	40.1336	25.7037	52.7853	48.4506	23.9695	33.1913	26.5001	28.7392	24.5765
IL27RA	ENSSSCG00000013766	30.6426	26.1059	47.5447	32.1291	47.3555	41.2078	34.826	36.4275	32.9107	27.6252	30.4049	30.9704	31.656	25.1704
AHCYL1	ENSSSCG00000006816	23.4231	24.5679	40.2178	35.582	38.1124	39.1436	50.4034	51.9592	56.0505	50.3667	49.0623	37.7817	43.6304	34.6818
ATP6AP2	ENSSSCG00000012247	25.0608	22.7412	28.4515	35.1679	37.9111	37.6574	49.2686	32.0215	35.6285	39.3488	41.436	50.3464	58.4542	54.6304
CHMP6	ENSSSCG00000017140	27.0007	21.2784	25.7019	26.7624	23.0063	20.5232	34.3008	28.8353	18.1578	34.1655	24.8877	40.9089	18.6323	14.2514
FJX1	ENSSSCG00000025588	48.4197	43.6715	42.5953	33.0931	32.2351	29.1017	27.407	40.0658	26.4338	13.3005	31.4865	21.5382	34.0086	25.9241
SMTN	ENSSSCG00000010017	42.9907	38.0465	39.6426	33.1249	45.7279	44.5684	17.9542	35.0235	30.4339	24.875	20.4522	16.5111	17.8971	13.8047
-	ENSSSCG00000016990	27.6973	23.6639	20.18	37.0475	30.6653	32.5003	40.8389	23.8863	23.5259	39.5241	28.3238	38.7256	54.9397	46.506
VAT1	ENSSSCG00000024059	53.1373	52.943	44.4961	50.9773	44.5275	42.9825	22.5432	33.4456	34.0157	33.6877	25.3683	33.5054	33.5252	25.5673
TMEM263	ENSSSCG00000038968	26.0803	25.5682	31.5118	37.0278	30.119	34.1554	47.519	30.5891	30.1828	33.9432	40.4864	37.6799	57.1588	39.0131
UTP11	ENSSSCG00000003645	20.0409	20.0469	19.7796	27.2397	25.9541	25.6614	39.868	22.2324	23.8383	38.4741	35.3184	42.119	27.2227	56.9147
TRABD	ENSSSCG00000000974	29.9888	31.0715	33.124	31.1862	27.3604	25.6278	29.1124	32.4116	25.9335	35.8015	22.4938	24.5591	32.9822	24.8445
TPM3	ENSSSCG00000006556	36.4291	37.8235	27.4285	35.21	26.9666	27.8868	31.6904	26.1743	25.5079	29.982	29.5936	30.5076	33.0397	24.9916
CLPTM1	ENSSSCG00000003085	39.7846	39.7284	35.1737	29.8305	41.9911	37.6757	19.833	38.1994	37.9112	26.7529	23.8058	22.9623	27.6009	26.116
TP53I13	ENSSSCG00000017788	27.4866	25.9032	41.5732	36.016	48.0852	46.2782	43.6883	43.716	40.2245	49.9388	27.813	53.7626	33.6494	46.1249
SEPTIN9	ENSSSCG00000017168	43.7426	41.0903	38.234	27.5125	38.5837	31.3737	18.3057	41.3467	38.6036	23.2332	24.7478	14.8163	23.9486	14.9275
SUCLG1	ENSSSCG00000008247	22.3264	19.4279	12.8363	17.2529	13.7133	13.1034	22.017	13.5994	13.1271	24.4013	15.5926	25.2876	16.358	34.546
-	ENSSSCG00000043175	20.7433	18.2769	11.7232	12.9844	11.5025	11.5089	27.7362	17.0005	10.4874	17.3822	16.9175	28.62	15.3672	19.6702
EZR	ENSSSCG00000004058	36.7333	37.2855	27.2405	26.0928	24.1898	24.2371	17.7077	30.9266	27.4332	27.2244	23.8772	21.0421	19.0488	24.0891
PDK4	ENSSSCG00000015334	42.3014	35.6365	7.89945	9.60171	9.43235	12.8258	28.25	28.8483	29.572	19.7985	34.6078	19.3447	30.8953	10.1277
IMP4	ENSSSCG00000015734	24.2087	24.9123	19.6799	25.9391	19.7903	19.6053	28.1695	23.9738	18.2506	36.9572	18.0179	37.9486	24.5943	37.0761
TMEM109	ENSSSCG00000013110	36.8774	37.2196	29.9813	28.8369	29.744	26.769	24.3723	31.1775	26.2163	22.525	19.3993	20.416	23.0057	26.8012
VGF	ENSSSCG00000039053	22.6328	20.2338	68.5995	24.8209	82.7576	45.8824	18.0105	91.3983	97.1553	21.7807	42.9309	27.5133	32.2896	23.1209
ZNF358	ENSSSCG00000025078	33.2267	34.6422	30.3181	35.1952	34.7283	30.3261	26.1386	33.9116	29.1834	31.379	16.4213	20.8121	27.1402	28.8573
CARHSP1	ENSSSCG00000026710	32.9541	30.0969	42.3359	47.2556	44.3438	39.0177	30.8732	36.0629	35.3201	39.4279	29.6101	38.0854	29.0641	47.7747
NUCKS1	ENSSSCG00000022398	32.2734	32.984	32.3606	26.7034	37.8944	33.9467	34.7277	32.4034	35.8666	26.0762	40.0651	31.2753	37.1282	41.4643
DPCD	ENSSSCG00000010565	24.8498	24.6083	18.6637	25.6561	19.7633	17.8515	37.4413	22.892	19.6507	38.7069	22.7196	48.0449	32.4736	45.327
AP1S1	ENSSSCG00000021145	28.2708	31.5628	30.9891	36.6826	30.6857	27.9164	32.9662	25.4097	26.6225	42.5977	28.3296	40.5148	26.7899	40.3317
SLC38A10	ENSSSCG00000022317	39.4768	32.4473	50.0152	21.6287	46.2322	33.7831	27.4431	45.5322	40.1498	21.9132	25.188	20.4953	25.9405	17.8279
-	ENSSSCG00000038364	25.7075	20.5219	22.3221	33.9028	24.3001	22.1766	49.1136	23.2593	17.5548	37.4242	25.2488	43.6834	28.4358	22.4633
CLTC	ENSSSCG00000022659	33.6064	35.4449	38.4336	33.6544	39.9251	42.8517	31.9088	36.9105	44.544	31.9875	40.9674	34.1532	42.9807	26.2769
LAMC1	ENSSSCG00000015555	80.8999	70.1792	55.637	19.8589	47.7586	35.3244	15.9032	30.4154	36.1413	10.8093	23.2536	12.8961	18.9273	13.1825
UROD	ENSSSCG00000003922	25.801	28.365	24.1197	37.3898	26.7216	26.744	34.8768	23.9933	24.6482	39.9204	25.3354	32.6304	34.9223	40.8797
ALOX5AP	ENSSSCG00000009330	6.87114	6.28451	10.7735	14.618	14.6685	14.0087	62.1154	54.0049	51.4698	82.2576	53.3543	88.4869	59.1349	78.1964
SPI1	ENSSSCG00000013237	28.8137	27.1572	27.0006	40.0252	29.9702	31.7964	23.0394	28.6876	29.7772	31.2557	21.3202	28.9861	29.4805	37.0597
DENND5A	ENSSSCG00000014578	36.1705	37.6076	46.019	44.2949	41.8186	41.0686	22.4232	40.3488	38.5922	34.6885	28.2202	22.2074	28.1141	17.6933
LIPG	ENSSSCG00000004509	20.7562	21.2475	55.259	27.1704	76.2826	71.4419	32.7439	49.4255	54.7396	23.6393	48.005	34.4066	45.6383	48.8032
-	ENSSSCG00000012916	39.4512	39.6594	33.9878	43.886	33.3279	34.2892	35.6669	27.809	31.9995	46.3811	30.9941	38.8769	38.2125	42.8344
LDB1	ENSSSCG00000010574	33.5872	31.5981	45.0278	33.0141	49.7499	40.4371	27.2142	39.2935	41.3395	25.4418	25.3692	25.7761	31.9986	29.411
UXS1	ENSSSCG00000008143	28.7878	29.5801	26.5183	27.4769	25.7551	25.5704	32.7479	29.6156	24.7194	33.0358	27.9341	30.3994	34.2188	35.686
THAP7	ENSSSCG00000033301	26.6129	25.4052	22.9604	31.437	18.8099	19.1718	30.2243	25.974	17.5257	31.9933	19.9165	26.9936	20.1452	49.0974
ARF5	ENSSSCG00000016593	42.8574	41.7298	29.1087	44.1676	28.3386	26.4948	28.3891	21.0148	18.8597	34.1047	19.7419	32.1085	26.7793	33.8737
CLDND1	ENSSSCG00000011980	20.399	19.1215	29.4773	41.0832	29.714	32.8305	53.0175	28.0552	31.3882	46.6456	44.4815	54.2033	50.7738	43.5819
MGARP	ENSSSCG00000009062	18.4011	14.52	12.9431	18.7875	12.6721	14.351	46.3167	12.1733	14.2328	30.9009	20.8518	35.4827	17.8425	45.8567
WBP2	ENSSSCG00000021672	30.6298	26.5258	42.1311	48.0068	43.9596	41.8587	27.9524	44.2707	37.8909	40.6051	29.0581	29.7635	19.4046	21.4295
C1QB	ENSSSCG00000033512	42.5358	39.6269	20.1058	28.8888	22.53	27.7891	27.3004	28.3153	30.243	32.9337	27.175	30.8198	31.5474	28.3737
MRPL3	ENSSSCG00000011179	23.308	26.9073	23.6487	28.4048	22.9549	24.2193	34.8379	24.4505	26.1549	36.3264	33.7801	41.9451	29.5998	33.5196
MXD4	ENSSSCG00000008687	38.0617	35.039	42.7818	34.1802	41.3768	34.0503	34.0213	46.3619	39.3053	37.77	32.4283	32.3165	28.4901	29.2351
AGT	ENSSSCG00000010184	2.43379	2.18881	14.1176	7.27529	10.662	14.6056	64.8678	76.3688	77.7213	79.6623	54.3737	48.6588	35.4795	39.0776
-	ENSSSCG00000012654	29.6371	28.2537	22.1783	24.6576	24.5058	23.5687	27.2437	29.4723	29.9042	43.9613	32.3986	35.1714	32.0057	37.7731
EWSR1	ENSSSCG00000009974	31.2988	31.1876	22.3656	20.4422	18.792	18.7707	18.5775	23.3503	20.4533	24.7277	24.2583	22.2836	20.1753	20.9951
KIF5B	ENSSSCG00000011027	31.0445	32.3906	29.3581	24.4198	29.8158	32.636	30.481	26.9136	31.8303	19.4291	37.6591	27.1601	34.4595	29.499
NQO1	ENSSSCG00000002754	25.0137	22.9719	20.555	25.9561	20.2399	20.5639	25.3194	14.9699	14.8238	21.4961	21.3726	25.6403	16.3873	27.5276
MRPL54	ENSSSCG00000024242	29.2533	27.5279	22.4633	29.8087	25.596	23.2546	27.5567	22.6693	22.6558	30.3066	25.3275	27.6761	20.1518	24.2262
CDK2AP2	ENSSSCG00000012902	37.283	35.1147	19.2419	28.1266	20.1743	18.7214	18.8416	24.5145	17.4052	22.6795	13.9859	18.0772	23.4979	11.0675
-	ENSSSCG00000031169	22.2107	23.5553	22.1303	32.8412	24.3032	27.5475	41.0492	26.4632	27.4035	36.0057	39.5435	37.7126	39.4685	20.4957
FLNC	ENSSSCG00000016578	17.3329	17.3467	13.4979	5.41884	13.4644	12.0754	3.7457	13.3669	14.3024	6.325	5.41578	4.3675	3.49028	3.35624
PALLD	ENSSSCG00000029331	45.9046	48.4096	49.6114	36.0215	48.7627	41.6704	17.7016	36.1014	34.9965	23.2869	26.6816	25.5999	25.2372	23.078
CA12	ENSSSCG00000004565	17.1168	14.9359	57.1313	31.7431	71.0101	63.0383	39.5842	61.2462	69.2738	41.2608	55.4832	40.828	45.4897	36.8731
API5	ENSSSCG00000013285	25.7555	27.0329	32.3452	37.553	33.2166	36.3329	38.9789	31.2728	33.3398	29.4518	41.0694	35.4911	46.7866	31.58
TNFSF12	ENSSSCG00000040188	33.8809	33.6211	28.6391	34.5936	28.877	26.9901	28.6771	30.3908	25.2301	36.2734	19.8366	30.1376	30.1291	36.4868
OSER1	ENSSSCG00000022714	27.676	22.8339	18.3992	22.7057	18.0585	19.9049	23.5913	15.6758	16.4353	21.0302	24.7879	18.7713	15.5918	31.4233
RELA	ENSSSCG00000012981	35.1787	37.1282	42.7373	44.3638	39.6983	39.6576	25.5357	41.5457	37.2895	36.1999	28.2296	27.1127	24.9316	19.6577
-	ENSSSCG00000040103	27.5655	26.9683	20.9332	24.4903	18.1397	16.5492	25.409	22.7599	17.5443	24.161	18.9566	27.593	22.036	26.1512
NDUFB5	ENSSSCG00000011764	19.1743	17.4428	11.1351	18.7702	12.9212	12.0155	34.8728	11.8664	11.8553	22.4677	17.4743	33.1574	21.1182	23.6882
-	ENSSSCG00000031381	21.6582	20.6284	25.3763	27.9021	30.3329	26.3388	48.2792	34.2918	31.4324	55.5683	32.8359	46.9671	31.9239	42.5615
PLSCR4	ENSSSCG00000011690	14.4953	15.4724	11.5981	13.2982	16.5373	17.3595	59.0184	47.3794	53.6842	56.3373	55.0667	53.429	33.8387	46.9176
-	ENSSSCG00000017106	32.5991	30.7863	23.996	30.3193	22.1102	21.2761	33.5425	24.8834	20.4829	22.2054	25.7358	23.5004	27.0702	23.2606
SMIM15	ENSSSCG00000033814	27.7686	27.6546	21.4393	25.5312	22.9277	25.5494	40.925	23.8591	24.6557	30.3473	39.9575	46.4566	35.1609	55.3385
KLF9	ENSSSCG00000021646	29.5984	31.5566	39.8818	36.6253	35.9828	39.1434	50.9765	46.7208	52.6265	37.5706	56.1519	39.1822	51.9751	38.6897
RBCK1	ENSSSCG00000007206	32.4742	32.5857	27.6041	29.0505	28.0486	23.367	35.2537	32.6899	27.1022	33.456	25.9263	25.5041	36.3951	31.8244
MRPL11	ENSSSCG00000012943	20.9564	24.609	17.7354	22.6815	20.2997	16.7793	32.6908	20.7165	20.3905	38.0535	23.6304	26.8452	22.2191	19.4333
SIVA1	ENSSSCG00000031132	25.5	29.4703	17.0238	22.5256	13.9666	12.6362	28.3664	15.4621	12.529	27.4134	16.5185	20.8695	18.1657	19.8595
FYN	ENSSSCG00000004421	48.598	44.2339	47.0919	49.6689	49.3683	45.0243	27.3564	28.6118	28.4837	23.9846	29.9169	21.8415	22.3345	25.7312
CD9	ENSSSCG00000022230	43.481	39.5079	36.2069	43.7962	36.4989	43.4238	29.8775	22.7584	20.4929	16.5264	27.8292	20.3955	20.8396	36.8059
VCAM1	ENSSSCG00000006862	9.17439	10.1687	34.0912	31.5116	34.201	42.5212	74.2318	40.7306	35.6539	46.1858	61.4889	52.115	72.5858	60.6269
HSPB7	ENSSSCG00000041935	18.0663	12.6931	0.550025	0.266956	0.542291	0.666157	0.537691	0.510011	0.212606	0.481584	0.185531	0.337093	1.0333	0.765131
TOMM20	ENSSSCG00000010158	19.8153	19.2075	15.7617	20.6882	16.2345	15.7929	33.688	20.0973	17.7581	27.5395	27.438	35.1262	31.3595	24.4364
SEC62	ENSSSCG00000029608	25.8573	24.3922	27.8088	32.7948	30.1704	34.5058	36.3771	23.6931	29.8603	35.4893	39.8157	51.4623	41.5791	48.2413
SYF2	ENSSSCG00000037481	22.7688	24.0099	25.0141	30.4336	25.658	26.9602	35.1576	24.246	23.0226	34.3185	35.0157	49.6307	40.9754	39.5034
KLF6	ENSSSCG00000035212	30.9146	31.9244	32.3429	28.6746	27.0309	32.014	24.944	28.4595	29.6647	20.946	32.2736	27.8214	31.0354	21.8508
MCM7	ENSSSCG00000032180	29.2258	29.9322	20.6108	25.6215	16.9336	16.8895	18.109	21.5859	19.4028	21.4153	18.5161	19.0208	17.5272	20.2409
MAP7D1	ENSSSCG00000003637	35.9645	35.2576	31.7993	26.5491	28.4225	26.6613	17.9738	28.4195	24.4486	20.665	17.4344	16.0594	18.3066	12.8185
RABL6	ENSSSCG00000005841	29.6777	27.9514	31.6454	28.278	28.1899	23.1099	22.1167	32.9041	27.3653	25.4328	16.8047	21.6462	24.0426	17.3354
LRRFIP1	ENSSSCG00000016330	23.8625	22.9284	36.6045	30.0814	39.0647	35.5194	27.5291	36.2212	35.9362	33.844	33.735	31.3415	29.899	41.497
DNASE2	ENSSSCG00000013731	29.8366	26.855	30.3122	32.685	38.2243	37.9923	36.0654	35.3459	35.2103	43.6759	36.6169	41.0222	45.9346	33.4473
VPS28	ENSSSCG00000005904	28.4677	25.126	26.8473	35.1085	27.8675	25.7775	30.8258	30.0065	23.612	41.0891	21.061	35.4299	30.2177	39.9725
TSC22D3	ENSSSCG00000030241	16.0137	18.058	25.0667	22.917	25.68	30.7734	59.4355	55.3411	61.8315	62.4463	50.9057	55.2389	55.5222	67.1055
MRPL18	ENSSSCG00000004047	23.1729	20.1805	18.5811	23.0941	21.7225	22.1121	31.0292	19.9504	17.7393	35.9891	24.1069	34.8106	17.4609	35.9558
PLP2	ENSSSCG00000012294	31.1493	30.8385	26.6116	40.6954	33.0248	33.4443	28.4483	28.5185	29.0735	34.9371	24.397	34.7156	30.5249	38.5088
SRPX2	ENSSSCG00000012482	34.0746	29.8176	33.4389	23.7663	43.1288	39.7246	34.1573	41.19	36.6358	34.1138	36.7405	30.3055	16.551	34.1723
BAD	ENSSSCG00000013033	32.8443	34.8275	28.6137	36.1367	35.3085	28.7304	40.2751	31.3622	28.1294	37.7954	18.7597	36.0666	39.7976	45.8079
CDKN1B	ENSSSCG00000037144	28.4328	30.0791	24.5399	26.6657	30.6746	31.0859	26.627	23.4091	30.6481	21.3034	21.007	30.9366	31.8864	38.6941
SRPRA	ENSSSCG00000015227	29.867	31.2703	32.3234	31.8565	33.5118	32.5994	27.7865	31.8459	31.5535	32.7667	31.4896	26.6227	30.0476	30.9541
SPON1	ENSSSCG00000013393	49.9784	46.0998	61.3877	34.3718	57.5778	46.6905	27.9703	37.442	44.925	22.8927	34.6251	26.8315	31.2574	39.2648
SUCLA2	ENSSSCG00000009405	14.0494	12.2824	12.2599	17.9006	14.0712	15.0893	22.758	11.1032	14.3064	20.9139	21.3551	24.152	32.4771	19.2956
-	ENSSSCG00000008056	33.7244	29.9176	35.8715	43.2591	37.1426	37.4272	26.148	33.8748	34.4253	45.6691	17.324	28.8558	34.7216	22.8116
THBS2	ENSSSCG00000004012	37.6154	35.0844	63.5634	26.2119	60.994	48.2984	30.0509	56.9782	65.8755	27.5644	34.5671	25.0085	36.9175	22.0179
TMEM126A	ENSSSCG00000025187	12.1867	9.1966	8.98339	13.798	13.5902	12.3131	32.5105	13.2624	12.83	28.7239	19.6652	46.9851	31.3525	23.5018
THAP11	ENSSSCG00000002769	29.4014	29.3362	30.0374	33.8557	26.1197	24.4502	26.7773	26.5774	22.2718	31.231	28.7547	28.1528	18.7037	24.8281
NR1H2	ENSSSCG00000003211	31.7012	28.1504	37.9098	42.1377	39.1281	36.1782	24.1357	31.7339	29.6683	35.8055	26.5535	32.3222	33.8245	16.6365
DNAJC5	ENSSSCG00000031602	32.2747	27.6051	23.5736	28.3753	25.9086	21.7631	22.4622	28.8584	21.7217	27.3105	17.776	24.5122	25.3339	35.1898
CDH5	ENSSSCG00000035772	76.1088	70.3569	45.087	38.1442	33.7775	37.9474	13.3022	18.5126	20.6749	7.89765	12.7048	11.021	14.5472	11.0853
CAV2	ENSSSCG00000016635	43.6696	42.5147	19.5195	32.0002	19.7181	23.6952	23.9743	13.7879	18.2238	17.9992	21.1308	22.3458	29.0254	28.8978
-	ENSSSCG00000010734	24.5289	23.0846	24.1055	30.7158	25.2036	28.0748	27.7047	26.1567	25.0222	37.4584	27.2811	37.3533	30.8731	19.0844
GET3	ENSSSCG00000038776	19.893	20.1773	16.9468	26.9955	17.3396	16.639	29.2432	18.6417	15.434	29.9711	18.2133	27.4361	25.5275	37.4923
PKIA	ENSSSCG00000006163	19.4325	19.1262	6.89389	7.7835	6.43209	6.20421	10.9009	6.90496	7.23493	7.74666	11.2758	9.36944	11.5	10.0969
RAB31	ENSSSCG00000037264	38.4646	42	37.1473	44.9938	38.8372	39.1052	38.5353	34.0999	37.6576	43.4824	38.0464	38.0161	31.7506	42.9729
BCL2A1	ENSSSCG00000040010	15.7151	12.5235	25.5495	43.5409	41.1398	44.4616	72.5404	23.9583	26.4996	53.1673	34.7435	72.6592	39.4168	78.0508
SPATS2L	ENSSSCG00000016090	43.9606	48.5048	32.9215	38.2534	30.1983	31.1117	24.5661	22.941	25.5445	28.9289	25.3633	24.0565	28.3371	26.842
DCTN6	ENSSSCG00000038895	22.6245	20.667	17.5723	24.4739	14.9434	20.2793	33.4263	16.4181	16.1257	33.2826	31.7819	36.4098	16.4886	39.5022
-	ENSSSCG00000035676	23.1142	24.4729	18.8245	23.0135	16.67	18.6582	26.3743	22.449	21.9887	27.7353	26.9922	27.2057	30.9079	23.7516
CAT	ENSSSCG00000013302	20.6031	23.3193	18.1181	26.0084	19.4726	21.808	39.3361	32.7711	32.0814	44.3525	41.4596	44.2055	26.347	28.815
PON2	ENSSSCG00000015331	27.7444	30.205	24.1506	30.9649	22.0473	23.7653	33.3989	20.355	21.7828	31.548	27.518	34.0892	41.0925	39.7262
RAD21	ENSSSCG00000006014	28.5254	30.9975	22.8189	27.1088	24.0781	28.6168	26.0434	23.3382	26.054	24.5656	34.2265	26.7639	35.3191	34.6368
GALNT1	ENSSSCG00000003743	22.228	23.6227	25.0745	29.3288	27.5463	27.5529	44.5247	32.879	37.4289	39.0682	48.6806	50.2869	52.016	45.8568
ERGIC1	ENSSSCG00000016988	21.3458	20.965	33.734	22.567	34.3899	34.3147	31.469	50.0126	48.4669	36.3107	38.199	28.6405	28.0197	29.3137
FCF1	ENSSSCG00000039202	17.76	18.1149	17.2668	25.5967	17.4863	19.4982	28.3486	20.0566	18.7689	37.4902	26.1755	36.1415	42.3635	62.9261
PPP2CB	ENSSSCG00000015842	31.0386	29.7202	29.354	31.8544	32.457	33.5658	29.3989	24.8029	28.0524	28.6462	34.42	34.7487	25.2418	28.1599
MAGT1	ENSSSCG00000012435	26.6153	26.1971	22.9432	25.6966	27.6055	29.1156	38.0666	24.716	29.1653	28.0218	32.8421	39.187	46.3317	37.9183
PSME3IP1	ENSSSCG00000034414	29.0396	25.4102	22.4212	28.0843	24.0768	26.0533	32.3902	22.3097	24.0012	31.9341	25.583	29.7404	21.1306	21.275
MARVELD1	ENSSSCG00000010527	35.717	44.4655	43.6445	34.2882	40.7498	36.3998	26.1738	49.1882	39.6722	28.4766	23.7666	17.6296	33.0247	12.4577
TYMS	ENSSSCG00000040678	9.85112	12.8014	32.7046	45.3313	34.4731	36.1217	51.8387	44.3495	43.1361	62.4675	43.1603	59.3097	50.7326	62.147
SPCS3	ENSSSCG00000015769	24.0329	20.6468	13.1009	19.1969	14.5227	14.0581	34.8565	16.0829	14.039	25.5145	23.9255	34.4362	33.016	24.522
ILF3	ENSSSCG00000013638	25.831	27.5191	28.6986	26.6456	27.7116	26.2481	20.5692	31.4261	29.8859	27.1728	27.8093	21.702	28.625	24.5574
UNC50	ENSSSCG00000025010	24.3735	24.5228	23.7287	30.2301	26.3663	28.5202	35.596	20.2653	25.891	39.0243	32.5159	50.8763	38.0034	45.737
SSR1	ENSSSCG00000001022	27.3328	25.4904	24.0805	19.7333	26.1556	23.2542	28.6323	30.4392	26.1587	26.5159	27.9514	27.6611	24.9836	25.1241
STAT6	ENSSSCG00000040435	28.7815	29.8165	40.0999	38.1983	39.4302	40.6449	25.5902	39.0821	36.8143	33.0815	26.3388	30.3323	31.6775	31.6247
LGALS3	ENSSSCG00000005055	13.6992	12.4216	36.3645	60.3617	46.7469	50.0056	46.5275	39.0426	33.7039	49.873	42.0031	52.0147	48.1855	47.7453
SNORA71	ENSSSCG00000025722	34.3099	31.865	21.3209	14.3518	22.354	9.31144	20.148	13.7545	12.1843	28.9169	6.88755	9.45661	15.6058	0
AAMP	ENSSSCG00000016189	28.7705	24.7106	28.7056	29.3708	28.0825	25.7142	25.6883	27.7028	25.1789	34.7895	25.1461	28.9786	25.7721	28.6931
TMEM128	ENSSSCG00000034122	29.259	25.8004	17.938	29.0799	21.6984	22.701	34.1166	19.26	21.2588	28.1994	28.0793	38.498	27.9235	32.962
DVL1	ENSSSCG00000003342	30.8804	30.4301	34.0054	28.2972	35.4657	29.6559	20.8441	31.8915	33.3312	25.7505	19.8178	20.0035	22.9448	28.8601
GPS2	ENSSSCG00000017940	31.4992	34.7196	26.9389	27.6681	25.8072	24.9024	21.2631	25.6652	25.1729	29.299	18.3707	17.0664	9.08942	21.4169
-	ENSSSCG00000040835	39.4694	40.7997	26.3399	30.0722	28.3054	26.6852	27.9109	27.2439	24.2342	24.2111	25.6673	23.7523	41.8809	25.7076
BABAM1	ENSSSCG00000031073	25.7341	24.313	23.4619	34.3452	28.0617	25.0558	30.3285	29.1291	24.8112	41.0572	25.3958	34.0766	18.1837	29.2663
ILRUN	ENSSSCG00000001527	29.5433	28.2871	29.3136	26.0703	29.3345	28.3979	17.4877	24.2457	25.17	21.1388	20.2562	18.9495	18.7619	14.0661
NDUFB11	ENSSSCG00000034487	17.4795	13.9819	11.6814	16.4121	14.4052	13.6206	19.897	12.6832	8.97206	20.0137	15.9634	19.2819	15.7502	15.2032
TAF15	ENSSSCG00000017707	30.79	33.1812	33.6608	23.4772	32.8093	29.1931	21.0601	30.1362	34.4691	34.239	23.258	27.7738	17.3659	12.8371
DNAJB4	ENSSSCG00000003766	25.3018	24.856	21.615	24.5223	17.5929	20.3404	39.3218	23.231	18.7093	22.0319	36.7577	31.8082	44.8081	30.8831
AGPAT2	ENSSSCG00000040845	25.8936	22.4518	23.3005	33.9414	29.5418	25.6453	24.7314	26.2299	20.0872	29.2797	17.6584	21.5645	21.2511	42.5649
CAST	ENSSSCG00000014170	22.2707	22.5947	22.2152	24.9627	25.9878	26.2866	26.2414	27.0196	29.6561	29.5724	34.857	28.2249	29.2871	21.8147
DEGS1	ENSSSCG00000024484	23.2912	20.4739	29.365	37.1324	29.2602	32.1591	36.4052	32.1597	29.2596	33.3956	32.8272	35.8277	28.3299	50.4052
KYAT3	ENSSSCG00000006925	21.0599	21.9499	21.3692	27.3616	24.8156	24.9228	35.1217	25.1678	27.4448	42.3153	29.2563	40.7967	28.5541	29.8152
PAIP1	ENSSSCG00000016874	25.0474	23.7821	22.6873	32.0285	24.9076	27.5382	35.5128	20.8657	22.0306	34.1083	28.2221	33.8308	37.4178	31.2025
-	ENSSSCG00000025673	26.1619	22.9729	26.9396	34.9854	25.1731	26.5702	30.4822	29.7447	26.0924	35.4976	24.9109	31.1422	20.6975	14.637
PRELID1	ENSSSCG00000031182	25.7158	26.646	22.2529	30.7193	22.8676	22.5552	28.8937	23.9658	21.4119	33.5885	25.7435	34.2107	30.3132	36.1073
BLOC1S4	ENSSSCG00000030673	20.2849	20.8441	26.1772	31.6304	20.4638	23.4577	40.8489	31.7632	23.6165	29.4792	29.9692	22.4	17.5489	57.8088
CD53	ENSSSCG00000006800	15.3588	12.3288	21.7806	33.0551	23.2377	27.5039	38.3178	29.0312	29.833	41.878	42.4635	44.8773	39.6111	44.2891
-	ENSSSCG00000026981	16.5526	17.0269	11.2315	17.6112	11.1675	12.0602	18.1281	11.0413	9.59579	14.1143	13.5085	20.8469	27.9074	17.1922
TOMM7	ENSSSCG00000015384	21.2287	12.356	12.0779	20.4467	19.5827	15.2435	37.5512	16.8587	11.713	16.9523	14.3353	33.0709	23.3476	30.0358
CYB561	ENSSSCG00000017297	7.51605	7.00137	22.5289	20.2242	25.8697	23.3935	56.7093	51.6022	43.8011	53.5638	43.4126	46.6782	49.4572	36.2227
YPEL3	ENSSSCG00000035430	28.5924	23.012	34.7515	41.8991	34.1589	31.8588	39.5453	35.1343	33.7203	35.6206	27.9523	29.574	30.9123	26.5899
DEAF1	ENSSSCG00000012850	23.0534	21.6985	28.8052	36.4185	30.4531	25.2387	30.271	37.0912	27.6183	41.6995	23.4074	37.3926	24.3146	26.1938
ARFRP1	ENSSSCG00000035304	31.5854	30.7161	29.7621	23.9233	24.7785	22.0182	25.8129	26.0944	21.1364	20.5739	17.856	19.5479	15.5424	22.2239
CTBP1	ENSSSCG00000031302	30.923	28.9368	34.7355	29.7852	32.8782	29.8005	22.6813	33.0044	28.7344	24.4776	25.5781	22.3223	19.3273	33.4368
KHSRP	ENSSSCG00000013538	33.2601	32.4923	35.1508	21.2843	29.0346	28.1991	10.2313	35.557	33.3436	20.0645	20.4095	17.1012	14.0826	9.01702
GTPBP4	ENSSSCG00000028602	20.8855	19.4465	27.552	24.5795	26.1839	24.3571	21.1076	34.8222	30.3216	30.87	29.4862	24.0507	19.5965	29.8267
MXRA8	ENSSSCG00000021880	40.5478	37.3427	59.3521	43.4383	66.5374	59.3842	26.7577	45.1563	47.0051	29.2631	23.2683	31.126	39.7044	29.8849
GUSB	ENSSSCG00000007739	27.1827	25.0673	41.6257	36.1248	43.5458	41.8239	31.8333	42.6417	43.1474	40.0578	35.2463	34.0941	34.4673	40.9003
CIAPIN1	ENSSSCG00000029519	21.3678	18.5894	24.4726	27.3949	23.4866	22.046	28.792	28.1288	23.7909	36.132	24.6218	31.1574	35.6208	12.8632
RNFT1	ENSSSCG00000017671	28.2205	30.0001	25.3022	39.9365	28.3108	31.1427	34.5018	20.9065	26.5822	36.159	34.3465	52.3764	48.1206	45.2612
CD68	ENSSSCG00000017956	26.6975	24.9392	41.6385	49.032	43.3719	50.2594	24.7372	38.2345	35.1208	35.4186	25.8906	35.6792	25.4449	38.7431
ALDH1A3	ENSSSCG00000004822	86.4647	91.6282	26.2425	38.1845	19.0498	19.2641	14.1291	11.0928	9.40518	11.77	12.712	11.8158	19.0462	17.5276
-	ENSSSCG00000012382	25.2386	25.4789	24.1184	33.315	24.9621	24.6421	35.3729	22.1144	24.7989	40.088	33.8762	37.0807	31.2937	45.0053
UBE2Q1	ENSSSCG00000006544	28.0603	27.8171	27.6626	34.177	33.0175	31.2405	32.105	28.5805	30.5618	30.5041	32.6244	33.3882	27.8062	16.6199
GNS	ENSSSCG00000023715	33.4447	32.7022	34.962	28.3476	38.8268	39.5536	30.1579	37.4757	40.0207	24.4746	39.1393	32.3075	35.1764	38.5152
-	ENSSSCG00000034415	18.6949	17.7842	19.5591	28.8766	23.1235	24.3487	47.6501	21.3885	20.0916	38.2894	30.7338	42.9282	50.3253	59.5503
VARS1	ENSSSCG00000038950	27.273	25.0589	29.5425	24.5084	30.2434	27.4853	16.9972	36.0656	33.744	35.7655	17.8629	21.9702	19.0295	16.45
SYNCRIP	ENSSSCG00000004294	21.5826	23.114	23.6319	24.0053	24.5738	25.6989	29.8582	25.9515	27.3049	25.1682	33.9565	29.4996	33.5268	38.4752
-	ENSSSCG00000013753	36.9779	33.6992	44.1175	40.0545	22.1776	21.5709	32.8412	32.961	18.6619	18.3118	25.3209	20.5106	35.8322	15.4175
RPN2	ENSSSCG00000028227	29.4755	30.2342	23.9711	20.313	27.9693	24.4631	29.0382	28.44	28.9745	27.8057	29.0326	25.6293	31.5045	23.5393
IDH3A	ENSSSCG00000032498	17.9112	17.9274	14.6981	19.3693	15.9256	16.5316	24.4758	20.3455	19.3405	26.6155	21.4074	24.376	21.1194	22.5931
-	ENSSSCG00000000697	40.5792	39.2414	39.0645	29.9813	38.9459	37.184	14.772	33.753	35.2921	25.782	26.3793	15.5038	19.9886	15.4247
C11orf58	ENSSSCG00000040570	21.2081	21.7339	19.6462	24.868	19.7054	20.6202	34.4868	18.2408	17.2553	28.959	27.8881	35.4527	31.9574	32.8021
COLEC12	ENSSSCG00000040397	21.7095	22.5946	26.215	15.9978	26.03	22.69	41.7957	39.542	33.7966	26.5672	42.5968	24.2205	29.8092	27.8361
ARF6	ENSSSCG00000005012	24.687	24.4415	31.5008	30.0322	25.3617	24.6819	36.4688	33.4976	25.781	21.5993	36.0973	28.6911	37.408	22.6051
NFKB2	ENSSSCG00000010580	33.9772	32.4772	43.5915	34.1563	43.0322	41.7566	23.2524	33.8464	35.8389	31.0055	24.1827	25.4055	27.3227	24.3694
SF3B2	ENSSSCG00000012957	30.3017	30.8497	31.8444	28.838	31.2511	27.6246	20.3621	30.5381	29.5116	31.1834	21.7009	22.0652	21.8452	14.6364
AEN	ENSSSCG00000005102	19.2877	17.0908	37.183	32.7283	34.3589	35.5308	33.7799	38.2652	34.3569	33.8591	30.4502	32.3604	31.8886	30.5154
AKT1S1	ENSSSCG00000003194	26.0881	24.9779	28.4115	30.6155	33.7223	28.4679	23.892	34.6151	29.9946	28.1338	19.2133	22.6341	5.74426	9.69723
TSSC4	ENSSSCG00000036015	21.4805	21.5959	21.8685	20.3127	15.1506	15.0258	19.8474	24.839	16.5113	23.5305	16.7431	23.9006	12.9113	22.0029
HADH	ENSSSCG00000009150	16.2471	15.9983	15.7335	20.1777	18.0498	18.3961	21.9534	17.4739	18.8144	26.9878	21.8219	24.6411	22.0308	15.988
-	ENSSSCG00000010954	14.917	13.955	12.6229	16.9583	13.222	14.0171	25.8646	14.5819	12.4414	24.106	19.6629	26.1767	17.16	20.767
SSB	ENSSSCG00000015938	21.5299	22.1945	18.3585	23.1607	20.926	22.8987	26.5173	21.621	22.5536	30.1913	31.0494	34.9439	23.1491	36.0702
TFG	ENSSSCG00000011961	24.6028	25.7271	29.6799	34.862	32.1979	32.789	34.1213	30.502	32.6172	43.8999	32.9378	38.3362	29.0083	39.9613
EGFL7	ENSSSCG00000005828	52.1715	39.1729	32.5776	34.0068	31.6867	29.3953	21.0447	22.273	19.6971	21.3062	15.1185	20.0785	16.3993	30.4887
C7H6orf125	ENSSSCG00000030668	28.1812	21.4654	12.1945	16.175	13.8871	11.4939	37.5333	14.3403	10.0384	21.9718	13.9285	25.3001	14.6118	21.3079
-	ENSSSCG00000022820	25.7303	25.2252	25.7427	36.0094	23.5715	21.1729	38.5406	20.3125	18.0246	35.6223	20.2983	39.9342	20.5903	41.307
SLC25A1	ENSSSCG00000010116	26.101	25.6443	25.4135	34.3425	29.7881	26.6895	29.4415	31.4769	25.2809	36.0085	23.0732	30.1097	23.5902	32.5972
-	ENSSSCG00000013038	20.3691	17.7567	19.8909	24.1843	21.4293	21.0941	17.354	20.244	17.8799	20.2612	12.4641	19.0294	15.249	36.4227
NSUN2	ENSSSCG00000017104	20.6873	21.2907	23.8414	22.6485	24.3738	22.8535	23.8914	30.8988	27.0653	29.3468	27.6103	20.6821	27.4964	15.5613
PNPLA2	ENSSSCG00000012841	25.3978	21.924	32.2025	27.0217	29.0538	26.0395	16.7559	34.443	27.2026	26.6553	18.4753	17.2805	19.9478	15.96
FAM120A	ENSSSCG00000008079	29.9594	33.1773	33.9266	27.0929	33.1054	34.0312	23.0109	36.0833	38.5959	24.7694	30.5926	25.5699	27.2477	23.8804
CLEC11A	ENSSSCG00000036814	40.4948	39.9152	32.8736	27.0826	34.5216	29.9814	34.8931	37.4301	32.9485	37.8468	24.822	27.7212	28.5346	26.6665
COL16A1	ENSSSCG00000003603	48.6721	41.2353	43.8194	13.2558	38.8375	26.1672	15.2639	35.3029	34.2737	13.5047	20.0262	10.9819	19.7742	12.6733
TRIB3	ENSSSCG00000039862	31.5374	31.14	23.2464	21.4022	18.8129	19.0448	21.5472	29.8037	30.0066	25.3693	21.9755	17.612	13.5081	12.8051
SULT1A3	ENSSSCG00000021557	12.5922	11.8206	28.6801	49.1667	32.8959	28.118	55.6675	32.2025	33.9865	44.7222	26.9068	38.1751	47.0775	49.3431
-	ENSSSCG00000027778	22.8149	23.9154	16.0124	24.2896	17.2466	18.4067	34.0005	19.4996	19.9137	33.2974	31.3867	37.4443	26.0329	25.2571
DPP7	ENSSSCG00000033991	25.7694	23.5591	33.2516	29.0548	34.2282	27.9203	31.0868	32.4249	32.0916	33.2161	22.4661	32.7385	26.4661	48.1221
ATPAF2	ENSSSCG00000028712	23.1314	18.7409	21.2037	25.4846	20.3198	18.833	24.5037	22.25	21.9377	36.0675	22.1013	31.1771	8.92446	36.8335
PGAM2	ENSSSCG00000016720	6.55197	5.26652	0.817903	0.713661	0.480874	0.729859	0.805114	1.14281	0.56029	0.283468	0.719372	0.688293	1.32373	6.5887
TRIM22	ENSSSCG00000014670	30.6666	28.3958	35.1451	40.1929	33.235	33.4138	36.6565	30.0243	32.1452	33.4192	35.7693	34.6117	51.467	43.0889
TRAF2	ENSSSCG00000005838	35.7016	33.3155	31.3709	28.5133	24.2824	22.2211	25.4419	34.2178	22.405	25.0895	19.8615	21.2493	20.2155	7.48739
TSPAN3	ENSSSCG00000001868	25.1807	24.5812	25.0892	30.5429	25.4754	26.3194	35.9122	22.947	24.7184	31.9294	27.7646	36.9125	33.5019	34.0951
UBL7	ENSSSCG00000001907	26.1177	22.1377	23.4658	30.5999	23.14	24.5459	24.9093	28.9129	24.1024	37.7242	20.8926	30.6169	26.6652	40.8795
-	ENSSSCG00000029857	23.7719	25.0612	17.9813	25.2059	21.3323	23.2706	30.0433	20.4378	23.8985	33.8187	30.7017	44.1426	30.1446	36.4607
ADAMTS4	ENSSSCG00000006359	60.918	52.3684	39.5756	24.8627	21.3833	17.329	16.2421	30.1521	19.0032	7.04857	18.8326	9.04332	21.0163	10.7791
SNAI2	ENSSSCG00000039568	40.5914	43.5942	15.7612	17.3482	15.8194	16.1463	26.3497	27.2136	28.1858	33.4886	28.5643	35.9364	25.4918	18.5164
PSMC5	ENSSSCG00000017287	22.3231	20.9063	19.1172	24.0394	19.0534	17.4957	24.2525	19.9729	17.6253	26.7138	18.464	24.5581	21.7232	29.0109
-	ENSSSCG00000032501	23.6408	17.2571	30.5818	32.967	30.2096	26.1982	34.0026	23.6947	20.8362	32.6354	21.638	31.9615	47.2581	30.1134
MICU2	ENSSSCG00000024667	24.4022	25.8763	23.2892	27.4509	27.1933	25.5118	25.4382	24.2907	22.1958	32.5936	28.3732	33.7338	35.6858	24.8054
LSP1	ENSSSCG00000031487	67.0599	61.2464	35.2246	38.7823	26.9535	23.8259	22.1547	24.7863	21.1665	23.9042	17.1065	17.1568	21.5198	26.2102
LAMA4	ENSSSCG00000004425	45.8771	40.4957	50.9725	26.241	48.9009	44.262	23.1647	27.9648	34.5893	14.85	25.6334	17.0337	30.2124	21.5202
ABHD12	ENSSSCG00000040449	32.0856	29.1741	29.127	30.473	29.0337	28.8181	26.5828	31.3399	27.5189	35.7086	20.6694	24.694	26.984	29.0827
ATG3	ENSSSCG00000011930	22.2535	22.5905	22.2892	27.2288	24.4347	23.8108	29.634	24.301	25.681	31.2763	28.5109	34.9822	23.5341	21.4601
PYGB	ENSSSCG00000022815	1.38776	1.53854	2.85612	2.45672	2.62577	2.28301	1.36455	3.25145	3.08656	3.28163	2.66762	2.55614	1.76749	1.22841
SEC23A	ENSSSCG00000001934	27.9002	26.1575	28.1785	32.1047	30.6337	32.8986	36.9288	29.8522	31.943	35.4194	40.1397	41.0289	41.8229	29.075
NOP10	ENSSSCG00000036960	27.973	17.7439	12.7295	29.7748	21.4118	19.0428	31.7339	21.3675	10.1873	19.0057	21.1286	32.7701	24.7272	35.0691
POLR2I	ENSSSCG00000039196	22.0166	18.6076	14.0888	20.2867	16.7935	14.8691	28.6309	18.024	12.9381	22.9313	16.3263	22.0504	12.6547	18.9601
CTDSP1	ENSSSCG00000036938	36.4992	33.8259	30.348	27.1013	30.1369	28.4172	23.3206	30.1837	26.9164	20.8656	18.5661	16.6374	20.6897	21.3965
ACTR1B	ENSSSCG00000008194	23.3185	22.8448	33.9893	36.0201	30.6007	28.0933	31.5856	28.6969	25.2706	41.0817	26.5176	26.3003	31.1565	37.4505
-	ENSSSCG00000050649	146.59	128.559	24.1958	22.8573	13.6908	12.0543	11.027	13.7114	13.1903	17.8367	9.7941	11.7243	9.79416	11.121
PQBP1	ENSSSCG00000025264	24.4208	19.1276	22.777	30.0367	25.0542	24.1808	28.5774	25.6554	20.6515	31.3016	23.3314	20.4348	20.8581	21.3724
XPO5	ENSSSCG00000001679	22.9197	22.6537	26.3349	22.2759	29.4166	28.7791	20.0593	34.5265	35.83	26.1543	29.8142	24.7745	28.693	23.8405
DKC1	ENSSSCG00000012823	20.8723	20.1353	17.689	18.575	16.8642	15.9137	19.391	23.42	20.2632	25.5229	19.396	21.1142	19.0197	19.9167
SNW1	ENSSSCG00000022932	25.1343	25.3729	26.6352	29.7529	25.0249	27.3689	28.6477	25.3223	26.1442	37.539	30.9788	35.9745	31.1653	44.714
PTRH1	ENSSSCG00000005615	22.5674	22.9358	21.6239	29.2286	20.2101	18.8629	34.733	21.112	15.9487	39.4977	15.5223	35.7596	16.2341	62.313
GOLPH3	ENSSSCG00000031705	21.6277	26.0344	30.3199	32.2665	30.7869	32.4553	33.2721	30.6988	29.8684	26.5146	34.7615	29.9762	40.4925	30.9031
-	ENSSSCG00000050616	34.4847	34.2049	49.8015	44.446	49.7772	44.2315	26.4659	24.4735	30.5885	20.4961	18.1409	20.1166	24.2877	37.5559
FBLN1	ENSSSCG00000000010	45.071	38.1111	31.2987	17.9411	27.2973	24.9148	17.292	25.5645	16.3577	14.9442	17.4258	12.3269	19.2794	7.49298
GSPT1	ENSSSCG00000021118	22.0461	22.929	23.1039	24.6487	23.2969	22.4094	26.6039	28.3646	25.6836	29.1551	29.4142	28.1775	32.7528	33.6665
-	ENSSSCG00000025674	19.7246	20.8333	16.4581	21.4839	18.2811	17.9109	39.2189	16.9103	18.6515	37.6115	25.8756	42.9991	18.9356	50.9776
KAT8	ENSSSCG00000031247	26.1272	22.1922	25.4365	31.2488	28.3993	25.7391	25.7796	23.3526	25.4133	36.2621	23.8013	25.3214	31.5879	18.8675
WTAP	ENSSSCG00000004050	22.6098	23.8016	22.8668	27.7077	19.8915	20.1617	32.9349	23.5857	20.9919	22.6892	30.0287	28.6333	28.3557	29.8884
PFDN1	ENSSSCG00000038493	18.8291	17.9241	14.0504	25.0163	18.4017	19.0073	29.535	16.5504	15.2765	30.6442	23.3975	34.5304	25.5101	32.2766
SNX14	ENSSSCG00000004293	30.4807	30.0122	30.3872	38.7889	31.5687	33.0416	37.5001	23.689	26.5722	29.6339	36.1549	31.9206	37.3937	44.122
PLXNA2	ENSSSCG00000026412	24.3752	21.5643	56.2128	21.7405	59.9779	47.0608	18.3614	71.9363	75.2003	26.1949	32.6544	21.413	30.2492	16.6913
RWDD1	ENSSSCG00000004446	19.7246	18.6652	13.5666	22.2893	15.9007	16.3562	31.8569	16.2087	17.2126	31.4521	24.598	41.4206	31.3496	31.7524
C9orf78	ENSSSCG00000030426	23.4179	19.698	22.4384	29.1827	21.2038	20.1462	37.175	22.7517	18.6494	32.3346	28.8068	33.2334	26.0846	31.8045
TMEM59	ENSSSCG00000034261	23.026	21.9681	24.772	33.2029	29.4509	30.4821	43.7984	24.8584	26.7593	37.8549	33.92	41.0434	32.0316	47.7724
ACTN4	ENSSSCG00000002965	36.3418	35.922	39.9611	31.1457	40.0555	38.7939	18.1038	46.0868	45.7094	32.2669	25.3173	19.2951	23.025	15.9846
MRPL17	ENSSSCG00000024693	21.6285	20.8643	16.9038	23.8599	18.6697	16.8397	28.5347	16.1316	14.1185	26.2822	18.2459	30.91	21.5044	25.0732
-	ENSSSCG00000039635	19.838	22.1514	14.1879	17.5735	12.4755	12.8835	25.0987	14.0758	13.2322	36.6712	23.4917	28.7926	15.5739	29.9788
TP53	ENSSSCG00000017950	24.1976	29.7282	26.5177	27.8765	27.4625	24.8239	27.8944	29.879	29.796	34.3656	19.2333	28.0398	26.1265	39.6689
ZFYVE21	ENSSSCG00000040945	28.387	24.9732	22.622	32.2096	24.6199	22.3562	23.9389	22.3383	21.0346	28.4176	18.177	27.3995	25.5229	56.2327
CDH11	ENSSSCG00000002795	41.0315	43.9453	39.521	33.2936	36.3288	36.1381	33.1481	31.2469	37.0851	24.5175	35.273	22.2772	33.1119	31.8084
ACP5	ENSSSCG00000032282	56.4899	45.653	43.0965	65.3487	46.3753	49.6938	15.6773	20.4036	20.5051	17.3655	19.4243	23.6126	15.8725	37.5139
SH3BP5	ENSSSCG00000024938	34.3489	35.8103	36.5198	36.4682	31.7511	32.9188	27.4634	32.6697	27.2277	26.368	26.5545	24.0074	26.3342	29.899
NSFL1C	ENSSSCG00000007187	24.4675	25.2835	19.9184	22.2198	17.7205	17.8901	18.3376	20.2032	15.0847	21.8629	18.7973	18.8785	26.1866	31.4476
NUDT1	ENSSSCG00000033926	23.5171	22.9697	16.6079	21.6655	15.8837	13.9844	29.0152	19.1194	18.1022	27.3448	15.9749	20.8782	12.3011	34.1622
NEXN	ENSSSCG00000003768	18.4715	18.6503	7.88462	7.83179	9.07562	8.97163	11.5482	9.26834	10.628	9.21638	16.004	13.1275	21.6301	12.6325
PRPF38A	ENSSSCG00000028288	21.1034	20.245	19.6515	24.8362	19.2435	18.2863	32.2926	20.8024	19.6455	29.0549	25.5665	27.1887	32.3872	38.9086
-	ENSSSCG00000013919	35.1961	38.4221	28.255	33.6325	25.2516	21.0987	24.5025	27.0324	21.7798	37.1687	16.5547	28.6297	15.6682	31.8172
OGFR	ENSSSCG00000034216	34.3018	31.566	38.9246	33.3507	30.8856	26.52	24.7724	33.5125	27.9363	31.4831	21.3153	24.3112	24.5857	13.3734
DDX1	ENSSSCG00000008619	20.1808	18.3628	22.4045	28.3293	24.804	24.828	34.9596	23.5324	26.5039	38.1012	35.3724	43.5496	32.3158	38.1582
CLINT1	ENSSSCG00000017047	21.2121	24.69	27.7422	27.5896	27.2771	28.3179	30.0119	28.0054	29.7489	30.4346	38.2383	34.521	30.8905	40.8287
MRPL46	ENSSSCG00000005105	17.3958	17.5229	12.8151	19.7033	13.137	14.6376	29.7061	19.9588	13.2193	24.7906	22.3311	28.0503	25.5821	24.6777
PFN2	ENSSSCG00000030260	24.3218	26.9677	20.4579	26.6865	21.9666	24.4886	25.198	19.4226	20.9209	29.8722	27.522	32.4748	25.4538	30.4685
ACTR10	ENSSSCG00000022299	22.8398	23.2141	21.0996	29.1502	24.8899	25.3984	34.2687	18.9595	22.1902	32.2802	31.1974	42.2424	37.8969	41.8232
MAPK3	ENSSSCG00000040682	35.2906	34.701	37.3919	39.4369	35.1511	31.8414	18.5226	29.137	28.8588	30.8377	18.3481	27.7562	21.6854	20.8108
TMEM101	ENSSSCG00000017371	24.2475	25.2721	22.0104	24.9337	24.9705	22.6302	32.2865	22.2215	23.521	33.2786	26.0614	29.2501	22.2939	34.6633
SNRPF	ENSSSCG00000000895	18.5784	17.3073	10.3488	15.7131	10.7547	10.1744	32.489	11.3598	12.4571	22.3791	19.4171	37.2576	23.0542	30.4511
FERMT2	ENSSSCG00000005041	26.2937	28.7431	24.1157	25.3289	27.7418	29.8647	32.1665	23.7586	25.2428	30.0246	31.518	33.8441	36.175	34.6405
BECN1	ENSSSCG00000017386	22.6788	25.4374	21.8799	26.6352	25.6251	22.3049	28.3679	22.7452	22.6625	32.1844	25.5036	33.4787	25.1872	36.8389
SEC13	ENSSSCG00000011572	21.7563	23	21.4587	26.0982	21.5678	21.8337	30.4405	23.7326	23.2341	40.9639	26.8109	37.1041	27.746	32.0517
NREP	ENSSSCG00000034993	75.8997	78.615	13.7678	19.4236	9.28626	8.59037	8.87905	6.06098	5.01873	3.78325	8.21637	4.1823	10.4255	6.63985
RNF7	ENSSSCG00000029774	21.8087	22.8255	17.937	23.3655	20.1404	17.2267	28.4889	16.43	15.5934	28.5573	20.6386	27.1204	20.753	21.3436
-	ENSSSCG00000035293	63.9243	54.745	19.329	19.3876	15.6826	14.6218	10.0111	10.4655	9.21776	8.37226	5.88817	5.05239	8.70951	9.7963
TMEM248	ENSSSCG00000007736	24.5365	23.2118	28.3462	33.2671	36.0021	34.0788	29.3026	31.5065	34.276	31.268	28.6528	29.3932	25.401	26.2463
ATP6V1G1	ENSSSCG00000032835	17.9781	20.3458	18.3388	28.503	20.1805	21.478	37.7885	16.0339	17.0128	30.127	24.6768	35.7764	28.4943	42.4426
SCAMP2	ENSSSCG00000001892	28.6095	26.1492	35.92	29.9309	37.9322	37.9223	27.0118	34.5841	33.8692	33.37	27.1323	26.7027	24.8404	19.5109
TCF25	ENSSSCG00000036102	27.684	26.3356	28.618	31.2027	26.5029	23.6007	24.087	28.3918	23.0404	32.6159	17.9361	25.555	20.7403	28.2452
PCID2	ENSSSCG00000009557	23.7772	19.6634	24.8712	29.3629	24.9212	22.5911	32.1724	26.4185	23.6175	28.6789	27.5853	32.7458	19.0746	31.8082
RFXANK	ENSSSCG00000036310	28.2125	26.0666	25.2828	28.1148	22.9871	21.5508	21.0345	23.8623	23.4763	37.6914	19.2009	27.2789	36.4822	29.6656
PEDS1	ENSSSCG00000027287	24.9887	25.2622	25.4207	27.0259	28.3754	24.0047	27.9776	26.0927	24.9539	28.3205	25.4627	28.2442	19.8097	25.6975
PYGM	ENSSSCG00000013022	22.1526	22.3742	23.1743	16.65	17.8632	15.5368	10.6169	22.9599	18.1733	12.1121	14.6889	10.9675	18.0304	9.06476
A4GALT	ENSSSCG00000026962	28.0595	26.5376	21.0212	18.0444	15.8623	14.5526	15.1127	18.8095	16.7318	17.5965	16.2113	13.8099	17.1209	24.0211
MRPS2	ENSSSCG00000005759	27.8145	27.4405	24.9548	28.5495	22.915	19.3243	19.0806	23.5672	20.67	28.2808	15.0631	23.09	18.9137	15.4858
LMF2	ENSSSCG00000000964	37.9001	34.2546	32.4468	23.6186	34.0988	28.1867	20.2286	30.5403	30.9302	20.4522	15.916	19.6375	24.0638	16.9186
ESM1	ENSSSCG00000016900	26.8041	26.3585	38.0226	32.3889	43.2358	34.2606	29.1894	20.8001	21.2453	23.0057	28.4712	29.0267	38.9776	37.6969
HSPH1	ENSSSCG00000009334	20.3727	19.8018	18.6776	18.8009	18.7225	18.2233	21.1003	20.5996	22.4476	20.3164	24.6695	20.3057	27.9309	29.5816
RCN2	ENSSSCG00000001866	22.663	23.102	17.3424	20.3812	21.0875	22.4548	35.7206	21.1922	25.3419	30.3863	25.1924	32.349	31.2299	24.6184
MFRP	ENSSSCG00000015119	34.7226	32.937	29.0885	27.9629	24.2148	22.3456	32.3526	27.9365	24.4116	30.4385	21.3723	25.0729	21.1234	26.1739
PPAN	ENSSSCG00000013662	21.595	20.9499	22.6408	21.3917	16.0455	15.791	26.9808	29.2841	18.7164	24.3848	25.6514	15.5931	17.5866	17.8941
MRPS23	ENSSSCG00000035193	21.8501	20.4579	14.3949	21.5999	16.7189	16.3184	31.638	19.083	17.5515	26.5972	21.6949	27.2223	19.182	26.2524
C1orf122	ENSSSCG00000038888	17.814	15.7194	19.3683	25.0373	20.3855	15.5049	27.7698	17.8325	14.9732	25.4373	17.4677	33.0207	22.775	37.11
TBCA	ENSSSCG00000014100	21.0633	18.8178	16.9519	24.1296	19.9134	18.6711	38.2424	17.1223	16.5822	33.3127	26.3031	42.5227	33.6316	45.5939
MBTPS1	ENSSSCG00000002682	32.6652	31.2802	33.2118	27.6024	32.9437	31.992	21.712	32.6125	31.5512	29.4943	24.5345	19.1902	19.3784	24.4652
TRAPPC4	ENSSSCG00000037439	25.6614	22.3862	24.2333	34.9288	29.0745	30.9896	36.0037	22.3071	23.6341	37.3036	25.3132	34.2074	16.9907	58.3993
MYBL2	ENSSSCG00000007366	31.3278	35.1994	16.6691	17.8362	11.8814	10.2311	12.2517	19.1438	15.8337	19.7256	12.4456	11.7381	15.1905	10.5246
ACLY	ENSSSCG00000017421	29.8369	31.8454	25.3797	23.2	24.3828	25.3121	16.424	30.9354	29.491	26.459	24.6858	24.3831	22.4802	22.9733
CS	ENSSSCG00000035686	19.3202	18.8704	15.599	15.5843	17.1075	16.8123	17.2775	18.1532	19.1008	19.9918	18.4612	19.2985	19.0081	15.1886
-	ENSSSCG00000000905	12.8165	12.189	10.5787	15.4724	13.2993	10.9232	24.85	13.1854	11.7725	24.4934	16.4938	24.7398	13.8622	35.2463
JUP	ENSSSCG00000017428	50.4175	47.4772	39.643	28.1328	35.4124	32.8886	11.5104	32.7051	27.3176	20.4904	16.7229	10.9049	14.7332	14.1855
ABHD11	ENSSSCG00000007715	23.2438	22.3235	21.4788	25.5761	20.67	20.7603	28.8253	21.2921	20.0431	37.7108	19.3376	30.1164	14.5791	37.1486
WRNIP1	ENSSSCG00000001010	28.0836	30.04	26.8807	26.0878	24.2671	22.258	20.5579	29.602	25.1431	23.0115	20.6595	22.1431	25.8759	13.3543
MYO1C	ENSSSCG00000021821	33.7191	33.4109	28.5784	27.2586	29.8869	26.8343	17.494	29.4914	28.9053	25.2536	19.2983	17.5783	15.0581	14.1702
S100A8	ENSSSCG00000006590	5.69752	5.09684	12.4961	19.0993	12.1854	12.9389	67.4634	18.6317	9.98805	32.9186	24.1679	35.1138	21.9258	57.2345
SNX9	ENSSSCG00000030535	23.9128	24.0648	33.3568	34.2597	34.542	35.4395	28.7463	30.2444	30.6856	30.8453	31.1174	29.7376	27.5425	28.8668
SLC25A20	ENSSSCG00000011366	26.5068	23.9848	20.0384	25.3934	20.8526	19.4443	29.6607	18.9004	21.4917	32.6532	27.5113	26.7809	29.982	20.9956
AP2B1	ENSSSCG00000017712	27.561	28.1019	27.5261	28.6679	32.4391	32.5095	21.0096	27.3472	31.5295	34.7222	26.8244	30.0953	28.605	26.6083
CDA	ENSSSCG00000021259	34.0712	35.9684	30.556	52.3613	39.6836	33.6738	19.0082	22.2154	20.5781	29.9357	21.0283	31.2599	27.0068	33.3482
TAF1D	ENSSSCG00000038682	18.735	18.9054	15.6425	24.0801	19.2184	21.687	42.4554	21.8346	25.159	37.9321	39.6036	47.1556	43.6752	41.1566
STK11	ENSSSCG00000013429	30.041	28.1009	27.4011	23.3121	26.4149	23.0803	22.425	27.1958	25.25	17.5156	25.1722	17.4661	19.9977	28.3303
TWF1	ENSSSCG00000000798	20.1827	21.0171	20.4942	27.1015	19.8213	21.5093	34.0961	20.6522	20.6644	28.1652	36.6656	34.9311	34.8723	35.0459
-	ENSSSCG00000000767	21.5556	20.4427	19.4673	27.3505	20.8001	21.7765	27.6978	17.8259	18.0626	29.49	26.2021	35.8044	26.3432	31.8578
PHLDA1	ENSSSCG00000000521	60.5171	62.0661	53.076	48.2991	26.3478	22.2717	23.2821	25.8916	16.4829	15.2851	23.3878	13.1934	19.9327	16.8598
TOP1	ENSSSCG00000007355	25.174	27.5544	27.1517	23.9644	27.6256	29.2819	29.6412	31.8743	33.2785	28.2094	36.6234	26.9146	24.2041	23.8641
-	ENSSSCG00000027124	29.2134	28.9284	30.392	32.1558	30.2967	33.189	39.3607	33.5159	35.4012	40.1335	24.0917	27.8534	28.8127	21.9955
DPF2	ENSSSCG00000012995	32.2566	28.7481	32.0552	31.5819	26.3311	25.4086	25.9471	30.5105	30.9706	26.1942	20.7423	19.2107	32.4053	21.9088
-	ENSSSCG00000008274	33.2027	30.2389	32.5881	26.6414	30.0891	27.5453	17.6984	30.9112	27.3925	22.4752	19.6087	14.228	23.1187	11.7544
ALDH3A2	ENSSSCG00000018041	24.4541	22.3893	35.956	33.2256	30.2788	28.3094	27.7149	32.8317	27.6813	28.3075	25.7288	23.0779	20.8058	15.5386
SART1	ENSSSCG00000012963	28.9043	27.1795	24.2006	22.8584	25.9647	22.8983	16.5271	26.9529	23.076	28.0353	16.2214	16.4527	16.3941	21.7926
TTLL12	ENSSSCG00000000034	27.5255	29.7845	25.805	25.4091	25.7717	21.4828	17.673	30.3707	27.2198	28.5043	17.0911	22.7328	23.2074	17.898
TWF2	ENSSSCG00000011435	28.7267	26.8884	16.5516	20.3834	18.71	17.9191	19.4755	17.7763	15.4494	25.9486	13.0369	26.5149	19.4843	22.4015
ACSL5	ENSSSCG00000031789	22.5105	19.9236	19.6113	22.6719	20.8225	19.6982	31.0747	25.0673	25.9065	30.2862	29.7806	30.6036	30.901	38.7624
TSKU	ENSSSCG00000014871	37.5661	35.5224	50.7738	29.3208	42.6147	33.9318	25.7893	42.787	35.1809	19.346	21.1833	16.4908	27.9672	14.9016
-	ENSSSCG00000005478	24.5876	25.7292	18.3722	24.4652	17.4898	18.5205	30.355	21.231	16.4406	22.8228	24.4003	28.0303	36.5992	13.4052
IGFBP5	ENSSSCG00000025924	44.2363	38.584	47.6792	27.7458	61.0247	54.4858	7.95467	11.6503	17.243	4.01653	8.66771	8.90026	11.4554	14.8831
RAB10	ENSSSCG00000008573	30.6385	31.4303	23.026	24.5675	23.671	25.0963	29.8375	20.8648	23.7576	22.4993	27.2881	28.6237	36.8596	35.0373
LTBR	ENSSSCG00000000706	34.3143	32.1957	26.9595	27.711	27.9308	26.3729	23.4437	26.9977	26.7354	20.9959	21.569	17.2928	22.2364	21.7955
DUS1L	ENSSSCG00000040352	23.6832	25.6155	20.315	20.7971	18.3213	16.9029	22.0943	23.8907	20.4906	25.9033	16.1084	22.4067	27.246	14.4445
VPS51	ENSSSCG00000013005	29.423	29.2545	25.1321	27.9151	23.8645	23.0114	22.2529	27.8472	22.0206	30.763	19.6556	20.5055	20.2047	16.3061
LASP1	ENSSSCG00000040642	36.2378	36.37	34.7407	31.905	34.4418	30.8264	22.1493	33.1086	29.7796	25.068	20.7741	18.3286	20.8346	18.5268
GPAT4	ENSSSCG00000007019	28.0732	26.5456	24.2689	17.7544	23.3741	19.6532	16.8696	23.0605	18.4633	13.3828	17.9613	10.7221	17.7751	25.6439
CAV1	ENSSSCG00000016634	35.4452	35.3367	19.6207	29.0649	18.7614	21.549	24.5859	21.2816	20.7319	25.8947	26.6048	39.4243	44.5214	34.3548
ADAM9	ENSSSCG00000015808	27.1507	28.1779	33.4541	22.8139	37.249	34.1003	36.7136	34.7006	41.1695	20.3237	42.1138	27.3528	33.4637	24.9767
PHGDH	ENSSSCG00000006717	50.9729	50.9147	17.5401	16.1645	16.3464	13.5434	21.9924	25.8113	20.4094	30.7782	19.1004	26.0975	16.0957	21.2954
ALKBH5	ENSSSCG00000035120	26.9618	23.5524	25.4231	21.8976	35.1586	28.6359	16.4801	25.5584	27.1656	17.0488	17.146	19.4329	20.3145	19.3826
MAT2B	ENSSSCG00000021229	22.6984	20.7143	17.5636	24.7171	22.8484	24.5785	33.7741	19.8239	22.9386	30.3641	26.2903	38.0536	32.7284	24.4405
SDE2	ENSSSCG00000010858	21.7932	19.6445	25.8397	26.9795	24.6903	23.8278	34.2945	32.2557	23.1538	32.6037	30.971	30.8474	41.6784	29.4396
-	ENSSSCG00000045776	18.0985	20.0029	18.1368	20.0528	15.195	14.293	27.2335	22.7262	18.8354	26.4761	19.7388	23.1515	13.8376	21.0268
BRD9	ENSSSCG00000035118	28.4082	25.707	30.1068	28.7482	27.2592	23.3527	22.8923	29.8915	23.2739	29.2987	20.9843	20.9262	23.9081	13.0293
C18orf21	ENSSSCG00000030002	16.753	15.0951	16.2022	23.0896	18.1659	20.7147	37.2355	19.5063	21.0779	38.4832	27.7094	50.4347	34.6346	45.8671
TMEM243	ENSSSCG00000025326	20.4736	19.8867	16.3693	21.4913	16.255	19.6242	26.9062	19.6286	22.6639	29.071	23.0629	29.4457	46.1299	21.5309
SYAP1	ENSSSCG00000012148	23.3714	23.9132	24.0578	32.8713	26.9009	27.7712	29.1694	23.1106	23.0436	33.5068	31.3397	34.0414	40.5607	38.9354
ZNF622	ENSSSCG00000016793	21.213	22.9223	23.9135	24.4622	19.8925	21.2322	22.1405	26.9937	22.1153	31.4492	20.6692	29.7737	15.3354	59.1994
NDUFA4L2	ENSSSCG00000027621	13.4197	11.5342	29.3951	34.4501	47.4729	47.6514	48.7612	47.2979	51.1498	63.8091	35.5301	48.518	26.5086	35.1106
HYAL2	ENSSSCG00000011405	31.4502	30.6273	27.6587	27.0642	25.9802	23.8045	26.2937	22.8094	21.3985	20.189	20.4079	22.538	28.7776	25.7731
OLFML3	ENSSSCG00000045712	30.4762	30.9985	35.9854	27.2921	36.2853	31.2178	32.6981	28.2903	24.495	29.7111	25.9875	25.2293	25.0294	33.8357
DYNLL1	ENSSSCG00000009904	28.4347	18.3872	12.5112	30.1183	19.2386	21.2056	32.7127	17.289	13.3076	23.5554	21.3396	31.4386	23.8513	30.0297
MOB2	ENSSSCG00000037847	29.4667	25.7411	25.7838	30.9457	27.3729	22.7512	22.3297	23.9382	21.0544	26.23	15.7703	25.2897	18.1007	33.6659
ETHE1	ENSSSCG00000003064	25.2626	27.2919	19.4236	25.7254	17.5619	17.3286	22.6724	20.2705	17.5216	33.7115	15.8879	29.0159	21.5098	43.3474
PIH1D1	ENSSSCG00000003169	21.7201	18.4806	19.8431	27.1746	22.6369	22.3991	38.6199	27.7388	19.3525	31.5491	21.5757	33.7396	23.0552	33.5336
MBD3	ENSSSCG00000013435	26.7125	23.8654	24.5883	22.5933	27.134	23.357	17.9666	23.1584	20.0632	18.8076	17.6006	17.1319	17.614	18.0099
PDLIM5	ENSSSCG00000009192	8.13612	8.55265	8.66919	6.73416	9.69473	9.59013	6.65486	8.07816	9.07229	6.22025	9.74033	6.67188	8.35555	14.9428
MAP4	ENSSSCG00000029251	34.1056	30.2296	33.6454	21.7726	31.7835	28.5929	12.4458	28.064	28.1621	17.295	19.309	12.7362	15.7546	11.9763
CCDC8	ENSSSCG00000033830	16.6643	18.4976	58.2463	47.5067	30.5901	29.7859	42.2867	45.4424	25.7526	26.3459	26.125	21.0594	31.6065	16.4857
MOBKL3	ENSSSCG00000016079	18.4357	18.5889	14.05	21.6833	17.9545	18.9396	30.1625	12.5602	15.5918	24.1232	24.5682	30.0637	28.9461	33.5601
HSD17B8	ENSSSCG00000001476	14.3445	11.829	13.3301	21.569	15.9918	16.4503	26.4269	16.5734	13.5842	25.2609	15.5017	30.1985	25.1577	23.7694
RPA1	ENSSSCG00000017822	22.7755	24.1083	21.4383	25.1732	23.0844	20.6158	27.0905	24.9689	23.3007	26.6114	27.801	27.3268	25.6338	23.6742
EXOSC5	ENSSSCG00000003015	23.0431	20.3251	20.8848	21.6905	21.0814	17.1973	31.2846	23.0634	19.2658	32.3167	17.5159	31.9805	16.0607	16.6741
TBX2	ENSSSCG00000027060	29.6742	30.6868	71.3386	41.7371	46.7445	36.1518	27.0072	49.7174	24.0105	14.8253	33.7611	15.8219	23.7632	9.16893
RHEB	ENSSSCG00000016434	17.644	18.2554	15.7788	20.4619	15.9635	16.5157	25.3908	15.1987	17.1754	24.7909	22.7948	30.4757	19.8396	32.755
STOM	ENSSSCG00000036639	37.1339	35.1358	24.2079	22.402	25.5135	27.6291	22.4809	25.1975	24.7676	18.1248	27.1577	16.6368	28.7519	23.5449
CHP1	ENSSSCG00000004751	23.8947	26.6596	21.5218	24.9599	22.1587	22.3428	25.2903	24.239	26.2009	30.6365	30.0037	31.7537	30.9134	27.3912
MRPS12	ENSSSCG00000031860	18.0879	19.5561	14.3918	20.4368	14.7607	12.4725	26.6797	19.7572	15.5868	27.1519	11.0712	23.7951	12.2489	20.9246
FAM3C	ENSSSCG00000016616	27.1418	28.1546	23.1426	21.6566	24.9872	24.1924	28.8739	20.8785	24.152	20.7305	30.6955	32.3458	43.6276	26.6322
CCDC59	ENSSSCG00000038987	16.2093	17.1221	14.559	17.6095	13.8611	15.1913	27.6361	17.7806	14.8968	22.6785	31.0286	31.3192	28.1815	28.5418
EIF2B5	ENSSSCG00000011783	22.3223	23.0056	21.276	23.0573	23.3158	22.3384	25.5349	24.2262	24.0712	28.1701	22.0987	27.5492	27.8976	29.8779
AKIP1	ENSSSCG00000033335	24.3317	21.8392	25.9099	24.943	23.4147	22.3362	27.2681	22.9855	20.4633	35.6766	24.2642	31.9046	25.9204	17.8532
P3H4	ENSSSCG00000017429	22.9749	21.6188	30.6123	26.8955	36.2432	30.159	31.6781	32.5372	30.0246	35.7832	22.3579	28.6945	30.6083	48.0319
JPT2	ENSSSCG00000008019	25.3732	27.114	21.0488	24.2847	20.7571	20.9629	17.4205	22.7681	19.35	25.0947	17.9131	26.2759	28.3343	19.694
CIR1	ENSSSCG00000027516	17.8827	16.9914	18.9251	24.714	21.6335	24.0537	31.2094	19.6439	22.3929	32.2741	39.5793	32.7766	21.1839	38.0369
-	ENSSSCG00000012757	18.7406	18.3414	13.8641	20.847	15.8774	15.3918	30.2435	15.7404	14.7181	30.2907	23.4817	28.4721	25.7092	24.7876
RRP1	ENSSSCG00000037061	23.0731	22.4806	25.9502	28.9192	19.7612	18.9862	24.5849	29.3375	18.0884	23.7303	20.4475	26.2321	22.9916	13.1849
SLC10A3	ENSSSCG00000025766	22.4178	20.2632	24.8659	26.4685	24.5543	20.5593	26.4222	23.6081	20.3914	23.8189	18.6792	31.8882	16.8034	24.0355
MRPL15	ENSSSCG00000030578	15.8885	16.5843	13.1703	18.1919	12.3168	12.897	23.6764	17.5919	13.6035	24.8296	19.3376	25.2206	12.8178	17.2141
RING1	ENSSSCG00000001477	26.1417	27.0365	29.5353	30.4526	26.7825	23.8093	25.848	28.8482	24.3465	30.6289	18.5361	28.9564	19.3335	22.5878
ALAS1	ENSSSCG00000011437	20.4254	18.5939	15.1913	15.8514	20.8884	19.0169	16.9183	17.3102	18.2215	19.1005	19.5468	18.9615	18.5468	21.0801
MPZL1	ENSSSCG00000006306	23.7141	26.4372	29.8293	25.4646	33.7528	30.2035	32.1081	26.0496	26.0332	25.082	25.5765	26.2581	24.9455	26.5158
SHARPIN	ENSSSCG00000005914	26.023	22.1068	23.3578	26.7063	24.8196	23.1468	21.2934	23.6085	18.1458	23.6577	14.1999	21.9085	33.884	4.31919
RBPMS	ENSSSCG00000015846	24.8634	22.8484	25.4586	24.0266	28.0015	26.4538	19.508	24.6238	25.7261	23.4692	18.2898	16.9072	24.3656	14.833
CYB5R3	ENSSSCG00000000038	34.5239	37.8554	31.5674	32.9421	29.3351	27.6816	19.1881	29.6201	24.3656	32.323	17.1424	23.5181	22.2297	15.0676
SLC22A17	ENSSSCG00000002025	35.6397	29.985	41.3718	28.2514	38.8527	34.864	23.4236	35.6176	31.1526	31.5803	21.844	21.6043	16.8003	25.8288
METTL21A	ENSSSCG00000036466	22.7569	22.4602	26.3387	31.6911	26.4843	21.6062	29.2689	21.5553	20.1896	27.9366	26.7248	29.5943	20.9739	42.6333
SIGMAR1	ENSSSCG00000037000	19.1942	21.6557	24.4897	23.9416	23.5837	22.8566	31.6983	29.9561	28.788	36.0852	23.97	31.8975	19.0835	49.9228
-	ENSSSCG00000016226	18.4789	19.1167	14.7604	20.5518	18.002	19.1104	22.8092	23.9263	22.5616	30.0877	27.8776	26.4711	19.6478	14.98
HES1	ENSSSCG00000031356	34.7984	33.1797	26.5078	34.3809	18.3037	17.6052	19.7371	26.8302	14.2728	13.2672	24.3815	15.7604	36.9229	8.95481
KRTCAP2	ENSSSCG00000006527	25.5207	19.2201	16.9081	26.6625	27.0456	25.4274	27.0396	22.5715	18.988	33.0247	21.3801	30.1711	35.4294	26.4466
ZNF511	ENSSSCG00000010774	23.4021	27.5383	22.6225	28.2696	24.0075	20.6648	24.3866	23.3975	15.7164	29.0278	17.9042	27.7974	28.0434	24.5591
-	ENSSSCG00000005638	4.26382	5.11588	57.3663	83.1291	76.1783	76.0058	52.2774	38.0345	58.7037	71.8751	32.3786	51.6567	38.8009	66.1091
IRF3	ENSSSCG00000003178	31.7332	29.4631	26.3884	30.4246	28.0791	25.2532	24.4035	27.1527	21.4072	22.2343	21.9978	23.5328	25.9998	33.8309
TRIM63	ENSSSCG00000027684	7.26939	4.77126	0.619168	1.19033	1.12658	0.795624	4.73937	3.40827	3.00761	5.77362	4.97293	5.60234	3.06093	0.188514
SDC2	ENSSSCG00000006088	17.5344	17.6417	32.5854	39.8915	35.1166	40.611	36.1098	28.6094	32.0438	33.5224	31.673	36.936	42.5745	52.8954
ACBD3	ENSSSCG00000024180	20.5926	23.3693	29.0023	29.9553	30.5907	30.3662	29.3791	28.1326	29.1727	28.7851	36.0529	31.1862	29.1594	24.4011
METAP2	ENSSSCG00000030608	19.9681	21.0552	18.7064	24.5178	20.6962	22.0079	29.4054	21.2302	22.782	30.3768	32.3318	34.8187	30.5633	22.6375
APLN	ENSSSCG00000048443	18.592	14.5196	65.5173	50.4956	67.5601	59.494	20.0617	27.0033	31.4978	17.131	16.2679	26.2949	22.8944	33.5152
CIAO2A	ENSSSCG00000034124	19.0272	21.1111	15.7182	23.5153	14.4993	17.5755	35.9611	14.4117	17.7225	32.257	23.3972	31.1887	30.492	15.3643
SPRYD3	ENSSSCG00000000262	31.8038	31.5124	29.5136	24.3299	24.8939	23.068	21.9772	25.3998	24.3937	26.54	24.4896	20.426	17.6017	23.9347
-	ENSSSCG00000005518	27.567	26.8165	21.0131	23.6952	20.1788	23.5264	27.3588	21.9926	23.4458	20.7365	27.2568	26.5248	38.3811	24.9467
SLC44A2	ENSSSCG00000013639	31.5554	29.8063	31.0867	29.852	30.5389	29.1461	22.1852	30.3216	31.2033	28.9757	23.5359	22.6984	23.6449	23.6004
MFAP1	ENSSSCG00000040383	24.9543	24.2352	23.2197	31.4235	25.4439	25.6949	26.1696	26.0126	24.9077	31.2428	31.0181	36.9322	26.6612	24.3262
IST1	ENSSSCG00000002743	26.6721	24.8761	26.8395	31.3055	26.0428	29.0689	25.4386	25.6343	24.7852	26.759	28.9033	30.5109	35.2503	21.937
RAF1	ENSSSCG00000024453	25.4524	25.868	25.3653	24.6265	24.2026	25.2875	19.3863	23.9045	23.545	22.2351	20.5283	19.3655	24.1395	19.2845
-	ENSSSCG00000026446	16.2044	15.2524	15.5953	19.9481	18.5379	19.3387	30.2911	19.9361	22.2726	34.4155	23.6195	29.8629	29.8627	28.4131
SF3B6	ENSSSCG00000008587	17.8023	17.404	14.4389	22.1152	15.4058	16.5704	34.3296	14.8766	14.4552	27.9776	20.6916	38.2109	21.8081	21.5385
ZNF75D	ENSSSCG00000012689	19.2771	19.1356	18.42	20.439	17.6092	16.8599	27.6404	20.4776	19.8813	30.4158	23.9315	31.4398	29.5846	8.95809
C1orf43	ENSSSCG00000006554	21.9189	20.3516	19.2491	25.5611	19.7768	21.2953	34.0089	18.8851	18.6431	27.0386	21.4319	31.1493	27.2541	27.4606
RSL24D1	ENSSSCG00000024983	15.3764	14.8654	12.046	19.6314	13.5447	14.4065	31.0804	16.3994	15.9812	23.8199	31.4449	32.3659	22.6337	17.591
EXOSC4	ENSSSCG00000005925	20.8245	22.5615	14.6381	17.3839	15.4218	14.9094	24.6499	18.8197	15.0732	24.8882	13.6707	23.789	8.8439	31.936
AMD1	ENSSSCG00000004392	14.5558	15.7546	10.9761	14.7108	9.9602	11.3623	19.4695	16.7527	13.3307	14.2066	21.0791	18.8247	24.1565	14.8303
TMEM30A	ENSSSCG00000033155	23.0337	24.0683	23.9785	24.6744	25.7656	26.9676	31.5525	24.9434	28.801	26.718	37.1024	33.726	40.3634	36.3375
SF3A3	ENSSSCG00000003643	22.8674	21.3304	17.5649	19.6025	18.3781	18.6202	21.9418	18.6867	20.2712	29.0868	22.5476	27.099	17.5731	17.081
SCARB2	ENSSSCG00000008980	19.9852	17.7099	32.4108	25.6373	36.878	35.3992	34.4363	35.4888	41.1316	32.9916	31.279	34.3156	38.2924	33.8724
SPRY2	ENSSSCG00000009482	26.4803	25.8952	27.1619	28.1103	26.7319	26.4088	29.9248	25.7366	18.2685	22.564	26.2176	24.6907	22.7473	25.3809
DMAC2	ENSSSCG00000032711	22.9295	23.7734	25.4957	23.9175	28.4148	25.6105	25.1779	28.4007	29.5545	28.2771	19.2509	28.1	20.2483	37.6478
MGMT	ENSSSCG00000010756	9.18779	8.86528	31.7831	39.9871	36.2707	31.6851	44.0316	37.5201	29.4442	50.6698	28.7539	45.2308	28.9719	55.1942
PFDN4	ENSSSCG00000007487	17.8482	15.8343	13.0994	21.2919	14.6918	15.0823	37.8943	12.9034	12.786	27.2524	22.5331	36.9004	30.9401	26.6274
POR	ENSSSCG00000038320	34.062	30.4222	30.1407	29.5714	31.3402	32.184	16.9522	32.2907	29.5995	21.5883	20.9781	20.4809	13.2033	20.7885
-	ENSSSCG00000014351	47.3755	34.9297	24.1587	33.1459	24.5337	24.462	14.4021	11.3913	9.69974	10.5946	11.8992	10.8917	11.7011	14.6599
RPUSD1	ENSSSCG00000008000	28.6803	26.5693	36.7566	25.5564	30.4886	26.3532	26.4583	36.0361	28.1639	25.9524	18.3745	16.2735	26.6186	13.5409
-	ENSSSCG00000033700	15.6624	16.5318	10.9993	15.263	9.16119	10.8317	21.3471	14.114	11.9265	24.4142	18.1533	25.7862	13.5604	25.2341
MRPS31	ENSSSCG00000009372	17.9676	20.4085	17.3063	27.6476	19.9836	20.1577	29.6601	21.5637	20.0521	28.8104	34.898	41.6986	11.1425	16.4083
PPT1	ENSSSCG00000036673	22.7669	22.7367	21.2408	25.4778	27.1236	26.7931	32.0086	25.5602	27.676	31.8659	28.7041	29.2692	31.8866	30.6378
CTSA	ENSSSCG00000007431	25.8753	24.106	33.2474	26.6417	33.974	30.9759	20.3501	34.2061	33.6366	25.0815	21.709	16.8971	18.4176	22.8231
PAM	ENSSSCG00000014184	29.8542	27.2733	17.8171	13.2775	19.1872	16.1762	15.6344	16.6216	17.5599	11.007	17.9627	12.9228	21.8799	11.7346
CCM2	ENSSSCG00000016734	23.3157	26.0193	19.5424	26.3256	19.3983	19.0497	16.0812	21.118	18.727	30.2085	14.7916	28.2157	24.3404	19.9624
-	ENSSSCG00000030015	24.2033	23.9563	16.6306	22.4554	15.6845	13.5875	33.209	17.9881	17.6997	28.7481	17.2565	30.6009	12.0771	10.7386
PSMD13	ENSSSCG00000014559	21.3049	20.0751	18.7958	24.4357	20.4082	18.6661	27.6061	17.5394	17.447	27.3877	20.5851	29.1712	14.9891	26.1441
PGP	ENSSSCG00000036614	17.0575	19.5048	17.4086	19.9118	16.9593	15.808	21.4249	17.6364	17.8002	27.1136	13.982	22.767	22.1301	17.9586
TFPT	ENSSSCG00000003262	21.0925	21.0383	16.8915	20.4167	17.2815	14.6964	21.1999	18.8422	15.5488	20.5669	17.3478	20.0428	5.59186	38.7053
POP7	ENSSSCG00000007672	21.6215	21.5754	14.2768	23.218	16.0817	14.1717	29.7667	18.3848	15.4863	30.8208	14.7785	22.6201	22.8379	30.2434
ATG101	ENSSSCG00000033687	22.2542	23.2476	23.0809	24.2537	21.2575	18.0007	24.9773	21.0679	17.0012	24.9171	24.2774	21.1192	28.7115	24.117
SMC3	ENSSSCG00000010625	23.4949	22.9139	22.6471	24.6857	25.3545	28.7773	26.69	23.0125	26.108	25.8373	33.4079	26.2847	46.5925	25.7976
TMX1	ENSSSCG00000038422	19.237	20.2454	17.6513	24.8114	21.792	22.7174	33.7209	21.8462	21.9018	26.5269	33.8719	34.7978	46.98	40.7508
RGCC	ENSSSCG00000009434	32.7688	28.7294	14.389	19.2954	12.7253	14.3959	20.4317	10.2528	8.73475	8.49978	13.1941	13.3336	12.4281	24.5543
PLA2G4A	ENSSSCG00000023351	20.7203	22.1592	39.9979	39.159	48.3931	48.5747	24.8908	18.7395	22.8511	27.7008	25.6559	31.484	33.2887	26.3116
DHX9	ENSSSCG00000026806	24.1364	25.5194	29.4721	24.9876	24.9322	25.1991	19.5683	27.9138	26.5928	21.7846	28.8218	17.3319	21.4622	12.9553
BAP1	ENSSSCG00000011438	26.1126	24.3118	24.4629	23.2289	25.36	24.3119	23.0223	29.2403	27.481	24.7103	19.9004	22.8809	19.5709	21.5143
CCL3L1	ENSSSCG00000017700	2.07589	1.3075	3.38219	4.82303	3.47788	5.12614	4.54834	2.22226	2.62475	2.27795	2.81289	4.8342	0	0
-	ENSSSCG00000016444	23.9781	21.6285	45.4865	61.0785	52.5995	52.3847	27.1635	28.4926	30.9176	37.6899	25.5078	29.8013	23.4467	54.774
-	ENSSSCG00000017928	27.6883	26.1129	20.9316	27.2413	21.3023	19.1646	24.3327	19.1473	16.3458	27.9511	14.882	24.4256	13.1847	30.1786
BCAR1	ENSSSCG00000028878	38.4827	37.2355	36.3504	24.6947	28.8241	26.0732	14.2751	27.1461	23.6051	15.5357	16.2624	11.4418	19.0789	22.4365
CDC20	ENSSSCG00000003949	33.2297	36.0258	9.51141	12.6914	7.26362	6.53381	11.7016	13.5878	10.3043	21.3173	12.7505	18.7992	17.7739	5.32733
NDUFAB1	ENSSSCG00000010795	14.5713	13.1966	10.6195	15.596	12.5919	12.7671	18.4491	11.4946	11.2091	22.7357	16.8656	27.4728	16.6703	30.1222
FHL1	ENSSSCG00000012699	16.7122	15.0186	10.6693	10.0475	10.1654	9.75963	6.84209	8.80572	7.30276	6.78401	8.42224	6.32691	7.95041	7.73988
IMMT	ENSSSCG00000024564	18.646	17.0375	13.0694	14.8677	15.019	12.7327	11.9973	14.3427	14.4189	21.5026	15.4256	17.5456	15.8681	15.442
-	ENSSSCG00000005623	23.1221	21.7568	31.4856	32.4749	31.5826	27.5882	24.433	28.2588	28.0354	33.1967	21.5864	28.8074	28.1804	27.8408
MFAP4	ENSSSCG00000036007	14.3148	15.0214	17.6125	20.3797	15.4067	14.8126	38.6011	42.2239	35.1186	46.0342	26.5726	27.8408	23.0575	29.3188
PTPN12	ENSSSCG00000015411	27.24	30.6169	24.5722	27.1593	23.8187	28.5482	27.4244	22.4468	27.1124	21.4724	33.2067	24.8853	24.9691	30.6344
COL8A1	ENSSSCG00000011973	96.9645	99.423	37.1036	23.9867	32.2819	25.2936	7.40533	8.1609	8.45733	3.99663	9.41058	7.84122	11.0466	13.4586
CYTH2	ENSSSCG00000003136	34.1224	32.3251	24.8584	30.9039	23.2274	21.1485	18.3156	20.9935	16.5945	23.3011	18.041	16.1419	12.3672	27.0303
PPP6R1	ENSSSCG00000003301	35.3582	32.3655	35.4268	22.23	33.4977	27.9865	13.3049	31.2885	30.1593	16.2768	16.4343	12.5398	16.5998	8.11743
HERPUD1	ENSSSCG00000040663	19.6972	20.9831	18.9492	23.1988	17.3338	18.6064	23.083	21.9568	18.5249	21.2208	23.4834	18.7097	19.5472	20.853
DBN1	ENSSSCG00000040706	42.1081	41.9208	36.1457	32.8419	31.618	27.3313	11.4127	21.48	18.9603	15.8448	14.5312	16.2254	19.457	14.9832
STC1	ENSSSCG00000009642	31.2443	26.4745	12.7396	15.7471	32.383	31.786	11.6001	14.4525	26.7154	12.6178	12.3339	15.0329	19.8041	23.0689
IK	ENSSSCG00000014372	20.9437	19.8135	23.5569	25.0622	24.5636	25.0938	24.9072	24.3931	25.2499	32.1644	26.6973	28.6952	26.7777	24.6615
ODC1	ENSSSCG00000027121	17.9802	17.0212	11.4012	14.3829	8.35243	9.28892	16.6641	14.3296	12.3697	15.936	15.0726	14.3155	10.8531	17.2387
CRTAP	ENSSSCG00000039054	27.0366	27.1894	28.0333	26.4909	30.3531	28.6684	26.1693	29.6723	29.0618	37.5823	26.1681	36.913	30.9526	27.6528
MGAT1	ENSSSCG00000014538	29.5692	26.6314	29.9627	27.1359	26.9171	24.2371	23.3559	26.7096	22.6708	16.6093	25.3596	19.4131	17.9817	33.2988
EPAS1	ENSSSCG00000008443	20.5922	18.3839	35.6396	26.6322	37.7466	37.8119	16.2723	27.4141	28.1449	17.0779	20.095	10.8056	18.5416	9.7319
MECP2	ENSSSCG00000034742	23.4647	26.0806	26.8648	28.8236	26.4896	23.014	21.9613	25.2099	22.6403	25.9592	18.0307	24.9458	17.0788	25.9178
SRP54	ENSSSCG00000001955	19.017	20.7466	19.5932	22.3077	22.2008	23.9845	26.1508	21.1082	24.0122	28.8064	29.4447	35.5493	19.7332	37.2645
YIF1B	ENSSSCG00000002952	26.4833	26.1743	17.5489	21.0919	19.3263	15.3965	20.6544	19.2802	16.5976	30.8233	18.0701	20.5385	22.1582	27.1989
TK1	ENSSSCG00000037120	24.7001	25.2423	8.98173	14.7898	6.63211	7.14312	12.3302	11.9356	9.13541	14.7142	10.4675	15.8844	9.84063	11.7534
SUPT16H	ENSSSCG00000022900	22.0971	22.5106	23.5947	23.8241	26.1462	26.83	22.2148	24.7349	27.7254	26.9995	31.2806	31.0624	24.5166	31.867
-	ENSSSCG00000005643	26.6624	26.1375	33.81	24.5909	30.7771	29.5996	19.6673	32.3847	27.5829	23.9925	25.3193	19.8648	15.8203	16.7137
TMEM203	ENSSSCG00000034562	20.2988	16.9063	21.7721	28.2013	19.2091	18.9535	24.009	22.2372	19.6722	25.1186	23.981	26.1698	21.0047	37.6027
MSRB3	ENSSSCG00000026004	15.6571	16.5813	18.3265	18.5971	19.1108	18.6094	24.437	19.7362	22.6344	21.321	26.0563	20.5688	30.2138	17.0978
EDEM1	ENSSSCG00000034197	30.1609	29.1338	31.444	25.3704	34.2652	34.0743	23.6024	34.729	36.3137	20.203	32.7401	24.2655	21.8306	30.2323
SNAI1	ENSSSCG00000032613	36.649	35.6819	43.8556	37.5126	18.5676	20.0642	18.6555	30.3639	11.0971	15.5603	20.6621	11.3669	21.9265	15.6855
MAPK6	ENSSSCG00000004624	19.0998	19.7763	17.6894	21.1781	16.2007	18.8998	28.5278	19.6806	20.0328	17.0393	30.4982	22.9774	34.2191	24.6849
ADD1	ENSSSCG00000008692	34.9605	30.4145	34.0199	23.9817	31.7097	26.2977	15.5169	29.7007	27.835	20.7284	17.3127	15.5329	22.0382	7.36897
CZIB	ENSSSCG00000003850	22.2825	19.1548	13.8033	20.2353	14.2684	12.2721	27.8506	14.186	11.7371	23.4201	14.4053	32.1277	15.4693	11.9263
SH3GLB1	ENSSSCG00000006930	22.7298	24.9332	21.7833	27.6989	24.9932	24.366	24.1579	21.6575	22.6183	29.9535	24.3373	31.5216	24.814	28.6618
USP5	ENSSSCG00000000684	23.7545	25.341	21.0835	21.5988	19.9569	18.7661	17.3325	22.1495	20.1275	22.9817	15.9528	19.2973	18.1051	16.419
KLF2	ENSSSCG00000038911	26.2553	23.9627	20.5292	24.7584	28.7878	31.3218	12.7154	18.678	18.2549	20.1217	12.5927	12.699	10.911	16.7507
PSMD12	ENSSSCG00000017273	16.4401	19.4893	17.8938	21.2486	17.1894	20.299	28.8557	19.7356	18.3696	23.3003	28.4867	27.9251	29.4826	30.8194
PCK2	ENSSSCG00000002009	38.7843	43.4966	20.0768	19.7193	18.2047	16.4155	15.8824	21.6296	17.4472	24.8664	12.1731	19.9881	17.0488	25.2722
COQ10B	ENSSSCG00000016076	14.479	14.5594	16.7416	24.5387	11.3782	11.8839	24.1916	11.844	9.5551	11.9023	20.0785	15.573	28.4696	5.21595
GDI1	ENSSSCG00000030421	27.1091	27.3515	35.7117	31.5875	33.8052	30.1545	16.9561	27.1664	23.2747	21.632	17.3968	16.9958	18.3673	20.116
PINK1	ENSSSCG00000003506	15.2612	13.6153	15.4362	18.6664	16.3163	16.0299	12.7195	14.2388	13.8507	17.1164	14.7029	15.0163	11.5859	14.8527
ORAI3	ENSSSCG00000007770	24.0418	30.3574	28.0835	28.1841	30.1879	26.9742	22.9671	29.5355	29.5166	28.4023	19.665	22.1217	23.8386	35.8554
DPM1	ENSSSCG00000034952	18.983	19.7679	16.3335	20.3301	17.2418	19.3498	26.4789	16.4909	17.167	21.4899	27.2695	34.9149	22.577	27.604
IL4R	ENSSSCG00000007817	33.1859	29.6183	39.8158	24.8448	28.7343	26.3016	17.4769	37.754	25.241	13.2582	21.2158	9.29164	20.258	13.531
-	ENSSSCG00000037510	21.9429	19.7888	16.9754	23.273	19.2028	17.2688	20.4861	16.2077	13.4787	21.5477	17.2993	23.2749	22.2137	21.3629
AQP1	ENSSSCG00000033190	38.8822	32.1646	24.7267	20.4951	21.6594	25.7623	10.072	12.1863	14.9569	14.7333	8.53993	14.3694	10.3556	15.3385
ERF	ENSSSCG00000032154	31.2357	32.7398	39.057	33.4681	32.3423	28.3272	18.281	33.2199	26.4927	18.704	15.8602	15.6531	17.1432	37.3585
PHB2	ENSSSCG00000024655	16.4925	19.8777	16.1688	21.626	15.7523	16.681	24.8358	19.2321	18.6877	37.4473	16.2313	27.6697	24.2645	27.6578
TMEM214	ENSSSCG00000008559	29.1797	29.3246	27.9384	22.9905	25.3936	24.1858	17.5873	27.0877	24.8117	21.3232	15.046	17.3241	13.8737	24.2348
CNEP1R1	ENSSSCG00000036005	20.3762	20.7446	18.1414	25.1459	17.1472	20.3397	31.3042	17.5233	19.3583	18.6973	27.2882	32.9414	30.1797	11.9472
PDXK	ENSSSCG00000034758	10.2578	8.34028	17.7072	19.7296	23.1195	22.0977	33.7946	34.5676	31.8357	41.7	25.3038	36.3054	26.3754	42.4574
TES	ENSSSCG00000040344	18.3864	20.0782	17.6865	21.1433	17.4189	17.151	31.5183	25.5052	21.0001	29.2029	32.1479	29.1209	23.7995	15.6832
NANS	ENSSSCG00000005373	22.956	21.6272	15.9434	19.0031	18.417	18.6218	23.4029	17.0824	18.5686	27.2074	20.8628	27.11	23.0258	24.5775
TEAD2	ENSSSCG00000025568	32.132	32.0494	22.7522	29.0321	21.8502	20.8948	14.7659	15.758	14.7814	19.1536	13.4799	18.1038	9.22804	23.99
DYNLL2	ENSSSCG00000020962	18.1975	17.6255	16.9168	14.132	14.1073	13.3228	15.1314	15.503	15.512	10.0598	16.1446	13.7179	12.1841	12.1758
ETS1	ENSSSCG00000015235	36.0943	35.5522	31.9534	28.2029	28.7111	31.4028	15.011	21.3915	24.8539	12.2914	20.5947	15.4826	16.9439	16.7133
BAG6	ENSSSCG00000001410	28.8399	27.9929	29.0865	25.144	29.6275	26.3422	11.8103	25.725	25.5061	25.5617	14.1836	15.5444	15.4937	15.6995
DIPK1B	ENSSSCG00000005837	31.5226	22.8411	20.9921	25.8781	26.294	24.8021	27.9289	22.751	18.8589	20.0949	16.3927	23.2476	19.279	31.2305
DHX15	ENSSSCG00000008756	17.7698	18.8588	17.3115	21.3923	18.1712	20.2323	26.7239	18.8623	20.0793	22.8466	28.9943	25.0124	31.8303	20.4373
SNORD34	ENSSSCG00000023143	18.9723	10.7933	20.9397	14.9301	14.9529	24.1476	27.3985	16.3062	12.6391	37.3735	18.2444	26.0256	63.3783	56.3977
COPZ1	ENSSSCG00000000290	19.3738	19.3974	20.7953	26.3769	20.2938	20.3541	24.6281	21.5319	21.3788	30.0103	22.8674	29.3172	24.1825	25.2726
NAXD	ENSSSCG00000029502	25.8255	28.0926	30.2793	27.376	27.4339	24.2111	26.6189	26.8451	24.7663	27.908	15.0942	23.7228	25.6506	29.5278
CD44	ENSSSCG00000013297	20.1461	18.7174	32.6299	23.2791	42.7702	39.7012	26.1538	28.6145	35.8468	27.4934	28.8665	26.5312	23.11	30.625
RNASE4	ENSSSCG00000031538	6.38437	6.67874	22.5596	31.2725	26.3154	29.6664	47.3542	25.2088	28.4665	41.5143	39.1966	48.9359	37.9471	34.639
COPB2	ENSSSCG00000011662	19.1294	20.4579	23.2823	28.7316	24.0763	25.5107	24.9475	25.0611	26.4169	36.4345	30.1817	32.3998	30.5072	31.9088
TMEM223	ENSSSCG00000038711	15.1866	14.9214	18.5306	29.5685	23.1218	19.9987	30.3375	23.8743	21.4389	33.7614	18.9561	33.9636	26.8095	36.897
WBP1	ENSSSCG00000035061	25.2925	24.8224	22.4869	31.4413	23.2529	19.3275	24.733	19.999	16.0813	27.4471	13.7242	28.9342	23.2505	21.877
ICAM1	ENSSSCG00000013655	26.4572	22.7688	34.0988	23.9868	35.6841	32.2671	26.3284	36.807	34.0013	18.4614	25.4461	17.8069	24.9523	13.8951
ACOT9	ENSSSCG00000012172	20.3881	19.0074	13.845	18.6462	15.8895	15.5566	21.8572	14.5393	15.8258	23.3837	18.2068	25.1496	18.2799	18.5614
TIMM17B	ENSSSCG00000022647	21.2559	20.3772	15.8625	25.9206	17.8435	13.9174	18.3296	17.2647	10.2368	22.1164	14.1332	21.1147	17.9662	19.2682
FCER1G	ENSSSCG00000006357	14.3467	14.7675	21.0834	29.4307	22.75	27.501	32.1762	31.9782	28.4922	47.3077	28.8578	36.558	30.6467	23.9879
ELK3	ENSSSCG00000023803	28.0507	28.6683	27.3894	26.2945	28.9102	29.4817	22.6839	27.554	25.5779	18.4182	28.7561	20.6838	24.5297	29.0171
-	ENSSSCG00000036483	20.3501	20.1109	18.7837	24.7202	18.8099	18.8274	27.6282	19.1342	18.5772	27.9453	22.9523	27.3183	21.7677	19.1426
RAB3D	ENSSSCG00000016928	15.1333	19.3759	35.8222	35.1422	27.9112	32.5078	31.9582	31.8464	23.8209	30.6737	23.7571	32.7657	42.0829	20.6115
TAF11	ENSSSCG00000001533	17.856	18.9306	14.9055	22.8021	15.3144	15.1691	25.5233	14.4181	14.9078	23.5175	20.8488	23.842	31.6216	28.6621
NTMT1	ENSSSCG00000005678	18.2765	16.0975	18.3581	19.1796	17.6157	14.8571	19.4125	17.5906	15.0383	24.9028	12.0645	24.956	14.2696	23.8489
LIMA1	ENSSSCG00000032269	25.0256	27.2071	28.3463	25.0453	31.4259	31.4536	27.6511	28.5804	33.8515	23.5874	31.332	22.207	23.6595	24.1781
VWA1	ENSSSCG00000003344	51.7168	38.76	41.2296	32.2911	40.969	35.91	17.3699	20.9958	18.7525	14.1284	10.1157	11.3122	16.3023	14.5492
ARFGAP3	ENSSSCG00000000037	20.2606	22.4813	25.1505	30.4762	28.5785	31.0201	28.9306	28.1924	29.609	37.127	27.8527	31.9585	35.1801	31.2787
ZNF330	ENSSSCG00000009052	18.1887	19.8135	18.8904	21.5912	21.8554	23.7458	30.0876	19.4179	23.2909	28.638	27.8207	40.6206	24.9684	22.3146
TSEN34	ENSSSCG00000003268	27.3481	24.8783	23.8621	30.1965	24.5484	21.9257	26.0084	21.9573	18.3126	29.7491	17.7807	25.4174	18.5492	14.4197
-	ENSSSCG00000013453	20.5573	21.7596	16.6444	20.3322	17.33	14.8247	21.7783	18.6842	16.1423	21.6611	14.587	18.0177	14.2091	24.0806
KCTD10	ENSSSCG00000009934	23.9271	25.2796	26.5299	26.0559	26.214	25.1699	22.061	27.8134	25.721	23.9171	24.1346	23.5104	23.0153	19.8385
GRK5	ENSSSCG00000010683	30.8543	30.6922	25.0572	18.1536	20.6627	17.0862	14.1756	18.6377	16.1421	16.6195	17.6683	19.1936	7.52488	7.55884
SEC24D	ENSSSCG00000009112	23.2882	24.6574	29.0972	30.0573	29.8781	31.9445	21.3841	31.2547	36.9373	34.8671	30.8339	30.6446	27.6166	30.8153
B3GAT3	ENSSSCG00000020809	26.4164	23.4977	23.904	27.3312	27.7543	25.4373	20.5696	22.8437	27.7425	32.9608	17.8591	26.538	23.5151	23.5283
RNPEP	ENSSSCG00000034151	28.2187	30.2719	24.9733	27.9219	23.3464	19.6503	16.9073	23.3409	19.4535	23.6618	16.7298	20.8328	19.332	23.8662
MTDH	ENSSSCG00000006084	18.2899	19.6308	19.729	19.6345	20.7319	21.7219	26.4268	21.6438	23.1852	18.1288	29.1757	23.2351	32.5095	32.469
ENAH	ENSSSCG00000038646	17.0365	17.6198	43.9279	25.9954	44.5661	40.256	20.4248	31.1946	33.7959	18.7097	37.1829	25.2193	35.2485	27.1993
GFER	ENSSSCG00000008035	22.4955	20.2893	19.4411	25.2502	20.8433	19.8488	23.7783	20.243	13.5075	24.8726	20.0771	22.1217	24.4675	27.3857
SRSF9	ENSSSCG00000009906	19.5324	20.5855	19.4769	25.034	20.1373	18.2551	22.9988	20.3468	19.0554	29.2529	21.2509	27.7177	21.6602	26.4962
-	ENSSSCG00000012088	33.2397	28.448	29.22	23.3835	27.4049	21.9816	25.9254	26.1391	20.6262	20.6581	15.9791	17.2747	21.1859	18.1247
PDK1	ENSSSCG00000015958	20.3052	20.4635	18.9877	22.0838	23.4225	25.7026	26.6063	20.4146	23.9884	28.5564	27.1544	32.1203	24.7043	26.0218
GPRC5B	ENSSSCG00000007864	40.1016	38.7189	36.575	22.1686	39.3222	32.2543	17.6066	23.8224	18.7888	13.4244	19.0032	12.9709	23.0873	16.572
SMIM19	ENSSSCG00000031857	17.735	17.727	17.0471	22.9512	19.9807	17.5591	32.6845	17.0778	18.4376	28.5065	23.7926	38.5051	26.2371	33.8513
SPR	ENSSSCG00000008309	18.9885	19.7279	15.3731	21.5536	15.9863	15.2901	23.9693	19.0676	16.5556	29.8888	17.1595	25.4186	9.5376	19.4977
ENY2	ENSSSCG00000038444	16.082	14.1328	10.9315	16.0587	13.544	12.9321	28.4632	13.5037	11.724	22.946	20.7565	27.9295	22.9451	26.0413
TMEM41B	ENSSSCG00000014579	17.4064	19.8887	19.5163	22.0744	19.643	20.6199	25.0917	19.0531	18.653	20.9851	23.4452	24.95	24.0425	33.098
NFKBIL1	ENSSSCG00000001402	20.6389	20.882	23.902	24.6519	25.1111	22.7085	22.2307	20.2437	20.5274	26.9029	19.2092	21.6092	31.3803	25.528
P2RY2	ENSSSCG00000040207	3.84785	3.56334	48.6227	33.7831	51.9071	50.3464	32.5342	42.6996	36.8944	35.7587	27.1595	36.0452	27.3019	22.746
-	ENSSSCG00000038362	19.8038	20.1413	27.6974	34.317	27.7691	27.7178	36.7623	23.0209	31.4241	21.6054	30.3349	22.7828	15.3692	18.2073
NCOA4	ENSSSCG00000010399	16.2773	17.3052	16.3214	22.621	18.7423	20.4807	28.4514	23.1286	23.2305	28.3648	29.809	30.5439	33.3261	19.137
MYBBP1A	ENSSSCG00000017882	20.598	20.1842	25.372	15.5915	25.9484	23.9364	7.49196	33.6594	31.0209	19.1053	14.6814	11.0545	9.35811	6.24921
RAE1	ENSSSCG00000007503	19.5274	19.5492	23.0095	23.4869	18.2787	21.0038	23.1695	24.3883	22.8153	26.7311	25.4649	23.3121	14.2711	28.0294
[truncated: 11,643 more rows]
